# Supplementary material for: Nanobody repertoire generated against the spike protein of ancestral SARS-CoV-2 remains efficacious against the rapidly evolving virus
Source: bioRxiv preprint, doi:10.1101/2023.07.14.549041, version 2 (2024-01-29)
Supplement: Supplemental Data 2 [file 549041_file03.xlsx]

## Sheet: Sheet1
experiment	replicate	nb1.name	nb1.conc	nb1.conc.units	nb2.name	nb2.conc	nb2.conc.units	effect	effect.norm	VoC
1	1	S1-1	4.05	µM	S1-23	0.646833	µM	31	0.0818136	WuhanPSV
1	1	S1-1	4.05	µM	S1-23	0.215611	µM	31	0.0818136	WuhanPSV
1	1	S1-1	4.05	µM	S1-23	0.0718704	µM	80	0.392178	WuhanPSV
1	1	S1-1	4.05	µM	S1-23	0.0239568	µM	61	0.271832	WuhanPSV
1	1	S1-1	4.05	µM	S1-23	0.0079856	µM	19	0.00580613	WuhanPSV
1	1	S1-1	4.05	µM	S1-23	0.00266187	µM	68	0.31617	WuhanPSV
1	1	S1-1	4.05	µM	S1-23	0.000887289	µM	84	0.417513	WuhanPSV
1	1	S1-1	4.05	µM	S1-23	0.000295763	µM	12	-0.0385316	WuhanPSV
1	1	S1-1	4.05	µM	S1-23	9.85876e-05	µM	33	0.0944815	WuhanPSV
1	1	S1-1	4.05	µM	S1-23	3.28625e-05	µM	14	-0.0258637	WuhanPSV
1	1	S1-1	4.05	µM	S1-23	1.09542e-05	µM	11	-0.0448655	WuhanPSV
1	1	S1-1	4.05	µM	S1-23	3.65139e-06	µM	7	-0.0702014	WuhanPSV
1	1	S1-1	4.05	µM	S1-23	0	µM	16	-0.0131957	WuhanPSV
1	1	S1-1	1.35	µM	S1-23	0.646833	µM	63	0.2845	WuhanPSV
1	1	S1-1	1.35	µM	S1-23	0.215611	µM	62	0.278166	WuhanPSV
1	1	S1-1	1.35	µM	S1-23	0.0718704	µM	55	0.233829	WuhanPSV
1	1	S1-1	1.35	µM	S1-23	0.0239568	µM	36	0.113483	WuhanPSV
1	1	S1-1	1.35	µM	S1-23	0.0079856	µM	51	0.208493	WuhanPSV
1	1	S1-1	1.35	µM	S1-23	0.00266187	µM	18	-0.00052783	WuhanPSV
1	1	S1-1	1.35	µM	S1-23	0.000887289	µM	14	-0.0258637	WuhanPSV
1	1	S1-1	1.35	µM	S1-23	0.000295763	µM	20	0.0121401	WuhanPSV
1	1	S1-1	1.35	µM	S1-23	9.85876e-05	µM	60	0.265498	WuhanPSV
1	1	S1-1	1.35	µM	S1-23	3.28625e-05	µM	19	0.00580613	WuhanPSV
1	1	S1-1	1.35	µM	S1-23	1.09542e-05	µM	20	0.0121401	WuhanPSV
1	1	S1-1	1.35	µM	S1-23	3.65139e-06	µM	113	0.601198	WuhanPSV
1	1	S1-1	1.35	µM	S1-23	0	µM	21	0.018474	WuhanPSV
1	1	S1-1	0.45	µM	S1-23	0.646833	µM	74	0.354174	WuhanPSV
1	1	S1-1	0.45	µM	S1-23	0.215611	µM	33	0.0944815	WuhanPSV
1	1	S1-1	0.45	µM	S1-23	0.0718704	µM	44	0.164155	WuhanPSV
1	1	S1-1	0.45	µM	S1-23	0.0239568	µM	42	0.151487	WuhanPSV
1	1	S1-1	0.45	µM	S1-23	0.0079856	µM	21	0.018474	WuhanPSV
1	1	S1-1	0.45	µM	S1-23	0.00266187	µM	15	-0.0195297	WuhanPSV
1	1	S1-1	0.45	µM	S1-23	0.000887289	µM	74	0.354174	WuhanPSV
1	1	S1-1	0.45	µM	S1-23	0.000295763	µM	21	0.018474	WuhanPSV
1	1	S1-1	0.45	µM	S1-23	9.85876e-05	µM	33	0.0944815	WuhanPSV
1	1	S1-1	0.45	µM	S1-23	3.28625e-05	µM	47	0.183157	WuhanPSV
1	1	S1-1	0.45	µM	S1-23	1.09542e-05	µM	20	0.0121401	WuhanPSV
1	1	S1-1	0.45	µM	S1-23	3.65139e-06	µM	12	-0.0385316	WuhanPSV
1	1	S1-1	0.45	µM	S1-23	0	µM	26	0.0501438	WuhanPSV
1	1	S1-1	0.15	µM	S1-23	0.646833	µM	24	0.0374759	WuhanPSV
1	1	S1-1	0.15	µM	S1-23	0.215611	µM	73	0.34784	WuhanPSV
1	1	S1-1	0.15	µM	S1-23	0.0718704	µM	21	0.018474	WuhanPSV
1	1	S1-1	0.15	µM	S1-23	0.0239568	µM	31	0.0818136	WuhanPSV
1	1	S1-1	0.15	µM	S1-23	0.0079856	µM	27	0.0564778	WuhanPSV
1	1	S1-1	0.15	µM	S1-23	0.00266187	µM	23	0.031142	WuhanPSV
1	1	S1-1	0.15	µM	S1-23	0.000887289	µM	7	-0.0702014	WuhanPSV
1	1	S1-1	0.15	µM	S1-23	0.000295763	µM	86	0.430181	WuhanPSV
1	1	S1-1	0.15	µM	S1-23	9.85876e-05	µM	15	-0.0195297	WuhanPSV
1	1	S1-1	0.15	µM	S1-23	3.28625e-05	µM	29	0.0691457	WuhanPSV
1	1	S1-1	0.15	µM	S1-23	1.09542e-05	µM	12	-0.0385316	WuhanPSV
1	1	S1-1	0.15	µM	S1-23	3.65139e-06	µM	63	0.2845	WuhanPSV
1	1	S1-1	0.15	µM	S1-23	0	µM	1219	7.60656	WuhanPSV
1	1	S1-1	0.05	µM	S1-23	0.646833	µM	37	0.119817	WuhanPSV
1	1	S1-1	0.05	µM	S1-23	0.215611	µM	26	0.0501438	WuhanPSV
1	1	S1-1	0.05	µM	S1-23	0.0718704	µM	64	0.290834	WuhanPSV
1	1	S1-1	0.05	µM	S1-23	0.0239568	µM	17	-0.00686179	WuhanPSV
1	1	S1-1	0.05	µM	S1-23	0.0079856	µM	77	0.373176	WuhanPSV
1	1	S1-1	0.05	µM	S1-23	0.00266187	µM	13	-0.0321976	WuhanPSV
1	1	S1-1	0.05	µM	S1-23	0.000887289	µM	42	0.151487	WuhanPSV
1	1	S1-1	0.05	µM	S1-23	0.000295763	µM	81	0.398512	WuhanPSV
1	1	S1-1	0.05	µM	S1-23	9.85876e-05	µM	22	0.024808	WuhanPSV
1	1	S1-1	0.05	µM	S1-23	3.28625e-05	µM	22	0.024808	WuhanPSV
1	1	S1-1	0.05	µM	S1-23	1.09542e-05	µM	270	1.59563	WuhanPSV
1	1	S1-1	0.05	µM	S1-23	3.65139e-06	µM	3782	23.8405	WuhanPSV
1	1	S1-1	0.05	µM	S1-23	0	µM	6429	40.6065	WuhanPSV
1	1	S1-1	0.0166667	µM	S1-23	0.646833	µM	0	-0.0131957	WuhanPSV
1	1	S1-1	0.0166667	µM	S1-23	0.215611	µM	16	0.0628117	WuhanPSV
1	1	S1-1	0.0166667	µM	S1-23	0.0718704	µM	28	0.0628117	WuhanPSV
1	1	S1-1	0.0166667	µM	S1-23	0.0239568	µM	28	0.145153	WuhanPSV
1	1	S1-1	0.0166667	µM	S1-23	0.0079856	µM	41	0.107149	WuhanPSV
1	1	S1-1	0.0166667	µM	S1-23	0.00266187	µM	35	0.37951	WuhanPSV
1	1	S1-1	0.0166667	µM	S1-23	0.000887289	µM	78	3.52749	WuhanPSV
1	1	S1-1	0.0166667	µM	S1-23	0.000295763	µM	575	9.74743	WuhanPSV
1	1	S1-1	0.0166667	µM	S1-23	9.85876e-05	µM	1557	18.2159	WuhanPSV
1	1	S1-1	0.0166667	µM	S1-23	3.28625e-05	µM	2894	16.1764	WuhanPSV
1	1	S1-1	0.0166667	µM	S1-23	1.09542e-05	µM	2572	15.524	WuhanPSV
1	1	S1-1	0.0166667	µM	S1-23	3.65139e-06	µM	2469	23.3781	WuhanPSV
1	1	S1-1	0.0166667	µM	S1-23	0	µM	3709	71.9152	WuhanPSV
1	1	S1-1	0.00555556	µM	S1-23	0.646833	µM	41	0.145153	WuhanPSV
1	1	S1-1	0.00555556	µM	S1-23	0.215611	µM	61	0.271832	WuhanPSV
1	1	S1-1	0.00555556	µM	S1-23	0.0718704	µM	35	0.107149	WuhanPSV
1	1	S1-1	0.00555556	µM	S1-23	0.0239568	µM	28	0.0628117	WuhanPSV
1	1	S1-1	0.00555556	µM	S1-23	0.0079856	µM	572	3.50848	WuhanPSV
1	1	S1-1	0.00555556	µM	S1-23	0.00266187	µM	1273	7.94859	WuhanPSV
1	1	S1-1	0.00555556	µM	S1-23	0.000887289	µM	2429	15.2706	WuhanPSV
1	1	S1-1	0.00555556	µM	S1-23	0.000295763	µM	7974	50.3924	WuhanPSV
1	1	S1-1	0.00555556	µM	S1-23	9.85876e-05	µM	5092	32.138	WuhanPSV
1	1	S1-1	0.00555556	µM	S1-23	3.28625e-05	µM	2562	16.1131	WuhanPSV
1	1	S1-1	0.00555556	µM	S1-23	1.09542e-05	µM	2091	13.1298	WuhanPSV
1	1	S1-1	0.00555556	µM	S1-23	3.65139e-06	µM	9139	57.7715	WuhanPSV
1	1	S1-1	0.00555556	µM	S1-23	0	µM	18620	117.824	WuhanPSV
1	1	S1-1	0.00185185	µM	S1-23	0.646833	µM	35	0.107149	WuhanPSV
1	1	S1-1	0.00185185	µM	S1-23	0.215611	µM	55	0.233829	WuhanPSV
1	1	S1-1	0.00185185	µM	S1-23	0.0718704	µM	78	0.37951	WuhanPSV
1	1	S1-1	0.00185185	µM	S1-23	0.0239568	µM	1294	8.0816	WuhanPSV
1	1	S1-1	0.00185185	µM	S1-23	0.0079856	µM	1394	8.715	WuhanPSV
1	1	S1-1	0.00185185	µM	S1-23	0.00266187	µM	6599	41.6832	WuhanPSV
1	1	S1-1	0.00185185	µM	S1-23	0.000887289	µM	8289	52.3876	WuhanPSV
1	1	S1-1	0.00185185	µM	S1-23	0.000295763	µM	7945	50.2088	WuhanPSV
1	1	S1-1	0.00185185	µM	S1-23	9.85876e-05	µM	11469	72.5296	WuhanPSV
1	1	S1-1	0.00185185	µM	S1-23	3.28625e-05	µM	12647	79.991	WuhanPSV
1	1	S1-1	0.00185185	µM	S1-23	1.09542e-05	µM	9938	62.8323	WuhanPSV
1	1	S1-1	0.00185185	µM	S1-23	3.65139e-06	µM	11708	74.0434	WuhanPSV
1	1	S1-1	0.00185185	µM	S1-23	0	µM	15655	99.0436	WuhanPSV
1	1	S1-1	0.000617284	µM	S1-23	0.646833	µM	24	0.0374759	WuhanPSV
1	1	S1-1	0.000617284	µM	S1-23	0.215611	µM	26	0.0501438	WuhanPSV
1	1	S1-1	0.000617284	µM	S1-23	0.0718704	µM	181	1.03191	WuhanPSV
1	1	S1-1	0.000617284	µM	S1-23	0.0239568	µM	698	4.30656	WuhanPSV
1	1	S1-1	0.000617284	µM	S1-23	0.0079856	µM	5280	33.3288	WuhanPSV
1	1	S1-1	0.000617284	µM	S1-23	0.00266187	µM	10247	64.7895	WuhanPSV
1	1	S1-1	0.000617284	µM	S1-23	0.000887289	µM	15703	99.3476	WuhanPSV
1	1	S1-1	0.000617284	µM	S1-23	0.000295763	µM	7716	48.7583	WuhanPSV
1	1	S1-1	0.000617284	µM	S1-23	9.85876e-05	µM	13937	88.1618	WuhanPSV
1	1	S1-1	0.000617284	µM	S1-23	3.28625e-05	µM	15606	98.7332	WuhanPSV
1	1	S1-1	0.000617284	µM	S1-23	1.09542e-05	µM	12541	79.3196	WuhanPSV
1	1	S1-1	0.000617284	µM	S1-23	3.65139e-06	µM	9815	62.0533	WuhanPSV
1	1	S1-1	0.000617284	µM	S1-23	0	µM	13569	85.8309	WuhanPSV
1	1	S1-1	0.000205761	µM	S1-23	0.646833	µM	43	0.157821	WuhanPSV
1	1	S1-1	0.000205761	µM	S1-23	0.215611	µM	58	0.25283	WuhanPSV
1	1	S1-1	0.000205761	µM	S1-23	0.0718704	µM	56	0.240163	WuhanPSV
1	1	S1-1	0.000205761	µM	S1-23	0.0239568	µM	2104	13.2121	WuhanPSV
1	1	S1-1	0.000205761	µM	S1-23	0.0079856	µM	9936	62.8197	WuhanPSV
1	1	S1-1	0.000205761	µM	S1-23	0.00266187	µM	16387	103.68	WuhanPSV
1	1	S1-1	0.000205761	µM	S1-23	0.000887289	µM	22102	139.879	WuhanPSV
1	1	S1-1	0.000205761	µM	S1-23	0.000295763	µM	15541	98.3215	WuhanPSV
1	1	S1-1	0.000205761	µM	S1-23	9.85876e-05	µM	11655	73.7077	WuhanPSV
1	1	S1-1	0.000205761	µM	S1-23	3.28625e-05	µM	12340	78.0465	WuhanPSV
1	1	S1-1	0.000205761	µM	S1-23	1.09542e-05	µM	15280	96.6683	WuhanPSV
1	1	S1-1	0.000205761	µM	S1-23	3.65139e-06	µM	9840	62.2116	WuhanPSV
1	1	S1-1	0.000205761	µM	S1-23	0	µM	14765	93.4063	WuhanPSV
1	1	S1-1	6.85871e-05	µM	S1-23	0.646833	µM	33	0.0944815	WuhanPSV
1	1	S1-1	6.85871e-05	µM	S1-23	0.215611	µM	87	0.436515	WuhanPSV
1	1	S1-1	6.85871e-05	µM	S1-23	0.0718704	µM	132	0.721543	WuhanPSV
1	1	S1-1	6.85871e-05	µM	S1-23	0.0239568	µM	2184	13.7188	WuhanPSV
1	1	S1-1	6.85871e-05	µM	S1-23	0.0079856	µM	7261	45.8763	WuhanPSV
1	1	S1-1	6.85871e-05	µM	S1-23	0.00266187	µM	9037	57.1254	WuhanPSV
1	1	S1-1	6.85871e-05	µM	S1-23	0.000887289	µM	17849	112.94	WuhanPSV
1	1	S1-1	6.85871e-05	µM	S1-23	0.000295763	µM	14402	91.1071	WuhanPSV
1	1	S1-1	6.85871e-05	µM	S1-23	9.85876e-05	µM	11998	75.8803	WuhanPSV
1	1	S1-1	6.85871e-05	µM	S1-23	3.28625e-05	µM	12967	82.0179	WuhanPSV
1	1	S1-1	6.85871e-05	µM	S1-23	1.09542e-05	µM	15582	98.5812	WuhanPSV
1	1	S1-1	6.85871e-05	µM	S1-23	3.65139e-06	µM	12200	77.1597	WuhanPSV
1	1	S1-1	6.85871e-05	µM	S1-23	0	µM	13928	88.1048	WuhanPSV
1	1	S1-1	2.28624e-05	µM	S1-23	0.646833	µM	35	0.107149	WuhanPSV
1	1	S1-1	2.28624e-05	µM	S1-23	0.215611	µM	71	0.335172	WuhanPSV
1	1	S1-1	2.28624e-05	µM	S1-23	0.0718704	µM	97	0.499855	WuhanPSV
1	1	S1-1	2.28624e-05	µM	S1-23	0.0239568	µM	1478	9.24705	WuhanPSV
1	1	S1-1	2.28624e-05	µM	S1-23	0.0079856	µM	8070	51.0005	WuhanPSV
1	1	S1-1	2.28624e-05	µM	S1-23	0.00266187	µM	12086	76.4377	WuhanPSV
1	1	S1-1	2.28624e-05	µM	S1-23	0.000887289	µM	20873	132.094	WuhanPSV
1	1	S1-1	2.28624e-05	µM	S1-23	0.000295763	µM	11978	75.7536	WuhanPSV
1	1	S1-1	2.28624e-05	µM	S1-23	9.85876e-05	µM	13896	87.9021	WuhanPSV
1	1	S1-1	2.28624e-05	µM	S1-23	3.28625e-05	µM	18251	115.487	WuhanPSV
1	1	S1-1	2.28624e-05	µM	S1-23	1.09542e-05	µM	19972	126.387	WuhanPSV
1	1	S1-1	2.28624e-05	µM	S1-23	3.65139e-06	µM	15496	98.0365	WuhanPSV
1	1	S1-1	2.28624e-05	µM	S1-23	0	µM	15503	98.0808	WuhanPSV
1	1	S1-1	0	µM	S1-23	0.646833	µM	87	0.436515	WuhanPSV
1	1	S1-1	0	µM	S1-23	0.215611	µM	53	0.221161	WuhanPSV
1	1	S1-1	0	µM	S1-23	0.0718704	µM	47	0.183157	WuhanPSV
1	1	S1-1	0	µM	S1-23	0.0239568	µM	1573	9.84878	WuhanPSV
1	1	S1-1	0	µM	S1-23	0.0079856	µM	5149	32.499	WuhanPSV
1	1	S1-1	0	µM	S1-23	0.00266187	µM	12716	80.4281	WuhanPSV
1	1	S1-1	0	µM	S1-23	0.000887289	µM	18217	115.271	WuhanPSV
1	1	S1-1	0	µM	S1-23	0.000295763	µM	14089	89.1246	WuhanPSV
1	1	S1-1	0	µM	S1-23	9.85876e-05	µM	13196	83.4684	WuhanPSV
1	1	S1-1	0	µM	S1-23	3.28625e-05	µM	14368	90.8918	WuhanPSV
1	1	S1-1	0	µM	S1-23	1.09542e-05	µM	14001	88.5672	WuhanPSV
1	1	S1-1	0	µM	S1-23	3.65139e-06	µM	11226	70.9905	WuhanPSV
1	2	S1-1	4.05	µM	S1-23	0.646833	µM	24	0.0374759	WuhanPSV
1	2	S1-1	4.05	µM	S1-23	0.215611	µM	24	0.0374759	WuhanPSV
1	2	S1-1	4.05	µM	S1-23	0.0718704	µM	13	-0.0321976	WuhanPSV
1	2	S1-1	4.05	µM	S1-23	0.0239568	µM	35	0.107149	WuhanPSV
1	2	S1-1	4.05	µM	S1-23	0.0079856	µM	29	0.0691457	WuhanPSV
1	2	S1-1	4.05	µM	S1-23	0.00266187	µM	20	0.0121401	WuhanPSV
1	2	S1-1	4.05	µM	S1-23	0.000887289	µM	5	-0.0828693	WuhanPSV
1	2	S1-1	4.05	µM	S1-23	0.000295763	µM	27	0.0564778	WuhanPSV
1	2	S1-1	4.05	µM	S1-23	9.85876e-05	µM	21	0.018474	WuhanPSV
1	2	S1-1	4.05	µM	S1-23	3.28625e-05	µM	47	0.183157	WuhanPSV
1	2	S1-1	4.05	µM	S1-23	1.09542e-05	µM	14	-0.0258637	WuhanPSV
1	2	S1-1	4.05	µM	S1-23	3.65139e-06	µM	7	-0.0702014	WuhanPSV
1	2	S1-1	4.05	µM	S1-23	0	µM	20	0.0121401	WuhanPSV
1	2	S1-1	1.35	µM	S1-23	0.646833	µM	29	0.0691457	WuhanPSV
1	2	S1-1	1.35	µM	S1-23	0.215611	µM	21	0.018474	WuhanPSV
1	2	S1-1	1.35	µM	S1-23	0.0718704	µM	63	0.2845	WuhanPSV
1	2	S1-1	1.35	µM	S1-23	0.0239568	µM	21	0.018474	WuhanPSV
1	2	S1-1	1.35	µM	S1-23	0.0079856	µM	19	0.00580613	WuhanPSV
1	2	S1-1	1.35	µM	S1-23	0.00266187	µM	20	0.0121401	WuhanPSV
1	2	S1-1	1.35	µM	S1-23	0.000887289	µM	21	0.018474	WuhanPSV
1	2	S1-1	1.35	µM	S1-23	0.000295763	µM	25	0.0438099	WuhanPSV
1	2	S1-1	1.35	µM	S1-23	9.85876e-05	µM	11	-0.0448655	WuhanPSV
1	2	S1-1	1.35	µM	S1-23	3.28625e-05	µM	51	0.208493	WuhanPSV
1	2	S1-1	1.35	µM	S1-23	1.09542e-05	µM	12	-0.0385316	WuhanPSV
1	2	S1-1	1.35	µM	S1-23	3.65139e-06	µM	11	-0.0448655	WuhanPSV
1	2	S1-1	1.35	µM	S1-23	0	µM	87	0.436515	WuhanPSV
1	2	S1-1	0.45	µM	S1-23	0.646833	µM	19	0.00580613	WuhanPSV
1	2	S1-1	0.45	µM	S1-23	0.215611	µM	34	0.100815	WuhanPSV
1	2	S1-1	0.45	µM	S1-23	0.0718704	µM	43	0.157821	WuhanPSV
1	2	S1-1	0.45	µM	S1-23	0.0239568	µM	61	0.271832	WuhanPSV
1	2	S1-1	0.45	µM	S1-23	0.0079856	µM	65	0.297168	WuhanPSV
1	2	S1-1	0.45	µM	S1-23	0.00266187	µM	25	0.0438099	WuhanPSV
1	2	S1-1	0.45	µM	S1-23	0.000887289	µM	19	0.00580613	WuhanPSV
1	2	S1-1	0.45	µM	S1-23	0.000295763	µM	16	-0.0131957	WuhanPSV
1	2	S1-1	0.45	µM	S1-23	9.85876e-05	µM	18	-0.00052783	WuhanPSV
1	2	S1-1	0.45	µM	S1-23	3.28625e-05	µM	26	0.0501438	WuhanPSV
1	2	S1-1	0.45	µM	S1-23	1.09542e-05	µM	78	0.37951	WuhanPSV
1	2	S1-1	0.45	µM	S1-23	3.65139e-06	µM	10	-0.0511995	WuhanPSV
1	2	S1-1	0.45	µM	S1-23	0	µM	112	0.594864	WuhanPSV
1	2	S1-1	0.15	µM	S1-23	0.646833	µM	19	0.00580613	WuhanPSV
1	2	S1-1	0.15	µM	S1-23	0.215611	µM	43	0.157821	WuhanPSV
1	2	S1-1	0.15	µM	S1-23	0.0718704	µM	36	0.113483	WuhanPSV
1	2	S1-1	0.15	µM	S1-23	0.0239568	µM	34	0.100815	WuhanPSV
1	2	S1-1	0.15	µM	S1-23	0.0079856	µM	17	-0.00686179	WuhanPSV
1	2	S1-1	0.15	µM	S1-23	0.00266187	µM	18	-0.00052783	WuhanPSV
1	2	S1-1	0.15	µM	S1-23	0.000887289	µM	42	0.151487	WuhanPSV
1	2	S1-1	0.15	µM	S1-23	0.000295763	µM	24	0.0374759	WuhanPSV
1	2	S1-1	0.15	µM	S1-23	9.85876e-05	µM	15	-0.0195297	WuhanPSV
1	2	S1-1	0.15	µM	S1-23	3.28625e-05	µM	92	0.468185	WuhanPSV
1	2	S1-1	0.15	µM	S1-23	1.09542e-05	µM	44	0.164155	WuhanPSV
1	2	S1-1	0.15	µM	S1-23	3.65139e-06	µM	9	-0.0575335	WuhanPSV
1	2	S1-1	0.15	µM	S1-23	0	µM	774	4.78794	WuhanPSV
1	2	S1-1	0.05	µM	S1-23	0.646833	µM	30	0.0754797	WuhanPSV
1	2	S1-1	0.05	µM	S1-23	0.215611	µM	99	0.512523	WuhanPSV
1	2	S1-1	0.05	µM	S1-23	0.0718704	µM	24	0.0374759	WuhanPSV
1	2	S1-1	0.05	µM	S1-23	0.0239568	µM	26	0.0501438	WuhanPSV
1	2	S1-1	0.05	µM	S1-23	0.0079856	µM	51	0.208493	WuhanPSV
1	2	S1-1	0.05	µM	S1-23	0.00266187	µM	17	-0.00686179	WuhanPSV
1	2	S1-1	0.05	µM	S1-23	0.000887289	µM	52	0.214827	WuhanPSV
1	2	S1-1	0.05	µM	S1-23	0.000295763	µM	21	0.018474	WuhanPSV
1	2	S1-1	0.05	µM	S1-23	9.85876e-05	µM	42	0.151487	WuhanPSV
1	2	S1-1	0.05	µM	S1-23	3.28625e-05	µM	89	0.449183	WuhanPSV
1	2	S1-1	0.05	µM	S1-23	1.09542e-05	µM	134	0.734211	WuhanPSV
1	2	S1-1	0.05	µM	S1-23	3.65139e-06	µM	420	2.54572	WuhanPSV
1	2	S1-1	0.05	µM	S1-23	0	µM	10537	66.6264	WuhanPSV
1	2	S1-1	0.0166667	µM	S1-23	0.646833	µM	23	0.031142	WuhanPSV
1	2	S1-1	0.0166667	µM	S1-23	0.215611	µM	53	0.221161	WuhanPSV
1	2	S1-1	0.0166667	µM	S1-23	0.0718704	µM	22	0.024808	WuhanPSV
1	2	S1-1	0.0166667	µM	S1-23	0.0239568	µM	18	-0.00052783	WuhanPSV
1	2	S1-1	0.0166667	µM	S1-23	0.0079856	µM	28	0.0628117	WuhanPSV
1	2	S1-1	0.0166667	µM	S1-23	0.00266187	µM	86	0.430181	WuhanPSV
1	2	S1-1	0.0166667	µM	S1-23	0.000887289	µM	342	2.05167	WuhanPSV
1	2	S1-1	0.0166667	µM	S1-23	0.000295763	µM	2325	14.6119	WuhanPSV
1	2	S1-1	0.0166667	µM	S1-23	9.85876e-05	µM	3099	19.5144	WuhanPSV
1	2	S1-1	0.0166667	µM	S1-23	3.28625e-05	µM	2808	17.6712	WuhanPSV
1	2	S1-1	0.0166667	µM	S1-23	1.09542e-05	µM	1752	10.9826	WuhanPSV
1	2	S1-1	0.0166667	µM	S1-23	3.65139e-06	µM	2552	16.0497	WuhanPSV
1	2	S1-1	0.0166667	µM	S1-23	0	µM	16884	106.828	WuhanPSV
1	2	S1-1	0.00555556	µM	S1-23	0.646833	µM	35	0.107149	WuhanPSV
1	2	S1-1	0.00555556	µM	S1-23	0.215611	µM	37	0.119817	WuhanPSV
1	2	S1-1	0.00555556	µM	S1-23	0.0718704	µM	39	0.132485	WuhanPSV
1	2	S1-1	0.00555556	µM	S1-23	0.0239568	µM	65	0.297168	WuhanPSV
1	2	S1-1	0.00555556	µM	S1-23	0.0079856	µM	1060	6.59946	WuhanPSV
1	2	S1-1	0.00555556	µM	S1-23	0.00266187	µM	1781	11.1662	WuhanPSV
1	2	S1-1	0.00555556	µM	S1-23	0.000887289	µM	1424	8.90502	WuhanPSV
1	2	S1-1	0.00555556	µM	S1-23	0.000295763	µM	5741	36.2487	WuhanPSV
1	2	S1-1	0.00555556	µM	S1-23	9.85876e-05	µM	7810	49.3537	WuhanPSV
1	2	S1-1	0.00555556	µM	S1-23	3.28625e-05	µM	4825	30.4468	WuhanPSV
1	2	S1-1	0.00555556	µM	S1-23	1.09542e-05	µM	9792	61.9076	WuhanPSV
1	2	S1-1	0.00555556	µM	S1-23	3.65139e-06	µM	7676	48.5049	WuhanPSV
1	2	S1-1	0.00555556	µM	S1-23	0	µM	14461	91.4808	WuhanPSV
1	2	S1-1	0.00185185	µM	S1-23	0.646833	µM	40	0.138819	WuhanPSV
1	2	S1-1	0.00185185	µM	S1-23	0.215611	µM	78	0.37951	WuhanPSV
1	2	S1-1	0.00185185	µM	S1-23	0.0718704	µM	89	0.449183	WuhanPSV
1	2	S1-1	0.00185185	µM	S1-23	0.0239568	µM	2832	17.8232	WuhanPSV
1	2	S1-1	0.00185185	µM	S1-23	0.0079856	µM	5333	33.6645	WuhanPSV
1	2	S1-1	0.00185185	µM	S1-23	0.00266187	µM	8923	56.4034	WuhanPSV
1	2	S1-1	0.00185185	µM	S1-23	0.000887289	µM	9928	62.769	WuhanPSV
1	2	S1-1	0.00185185	µM	S1-23	0.000295763	µM	15013	94.9772	WuhanPSV
1	2	S1-1	0.00185185	µM	S1-23	9.85876e-05	µM	12202	77.1724	WuhanPSV
1	2	S1-1	0.00185185	µM	S1-23	3.28625e-05	µM	8981	56.7707	WuhanPSV
1	2	S1-1	0.00185185	µM	S1-23	1.09542e-05	µM	16265	102.907	WuhanPSV
1	2	S1-1	0.00185185	µM	S1-23	3.65139e-06	µM	17695	111.965	WuhanPSV
1	2	S1-1	0.00185185	µM	S1-23	0	µM	12796	80.9348	WuhanPSV
1	2	S1-1	0.000617284	µM	S1-23	0.646833	µM	38	0.126151	WuhanPSV
1	2	S1-1	0.000617284	µM	S1-23	0.215611	µM	42	0.151487	WuhanPSV
1	2	S1-1	0.000617284	µM	S1-23	0.0718704	µM	70	0.328838	WuhanPSV
1	2	S1-1	0.000617284	µM	S1-23	0.0239568	µM	1663	10.4188	WuhanPSV
1	2	S1-1	0.000617284	µM	S1-23	0.0079856	µM	11390	72.0292	WuhanPSV
1	2	S1-1	0.000617284	µM	S1-23	0.00266187	µM	9827	62.1293	WuhanPSV
1	2	S1-1	0.000617284	µM	S1-23	0.000887289	µM	11695	73.9611	WuhanPSV
1	2	S1-1	0.000617284	µM	S1-23	0.000295763	µM	11879	75.1265	WuhanPSV
1	2	S1-1	0.000617284	µM	S1-23	9.85876e-05	µM	13874	87.7628	WuhanPSV
1	2	S1-1	0.000617284	µM	S1-23	3.28625e-05	µM	15115	95.6232	WuhanPSV
1	2	S1-1	0.000617284	µM	S1-23	1.09542e-05	µM	12616	79.7947	WuhanPSV
1	2	S1-1	0.000617284	µM	S1-23	3.65139e-06	µM	23058	145.934	WuhanPSV
1	2	S1-1	0.000617284	µM	S1-23	0	µM	11790	74.5628	WuhanPSV
1	2	S1-1	0.000205761	µM	S1-23	0.646833	µM	114	0.607532	WuhanPSV
1	2	S1-1	0.000205761	µM	S1-23	0.215611	µM	32	0.0881476	WuhanPSV
1	2	S1-1	0.000205761	µM	S1-23	0.0718704	µM	759	4.69293	WuhanPSV
1	2	S1-1	0.000205761	µM	S1-23	0.0239568	µM	2938	18.4946	WuhanPSV
1	2	S1-1	0.000205761	µM	S1-23	0.0079856	µM	8281	52.337	WuhanPSV
1	2	S1-1	0.000205761	µM	S1-23	0.00266187	µM	13585	85.9323	WuhanPSV
1	2	S1-1	0.000205761	µM	S1-23	0.000887289	µM	11533	72.935	WuhanPSV
1	2	S1-1	0.000205761	µM	S1-23	0.000295763	µM	13209	83.5507	WuhanPSV
1	2	S1-1	0.000205761	µM	S1-23	9.85876e-05	µM	15180	96.0349	WuhanPSV
1	2	S1-1	0.000205761	µM	S1-23	3.28625e-05	µM	13669	86.4643	WuhanPSV
1	2	S1-1	0.000205761	µM	S1-23	1.09542e-05	µM	12842	81.2261	WuhanPSV
1	2	S1-1	0.000205761	µM	S1-23	3.65139e-06	µM	12221	77.2928	WuhanPSV
1	2	S1-1	0.000205761	µM	S1-23	0	µM	15829	100.146	WuhanPSV
1	2	S1-1	6.85871e-05	µM	S1-23	0.646833	µM	46	0.176823	WuhanPSV
1	2	S1-1	6.85871e-05	µM	S1-23	0.215611	µM	38	0.126151	WuhanPSV
1	2	S1-1	6.85871e-05	µM	S1-23	0.0718704	µM	232	1.35494	WuhanPSV
1	2	S1-1	6.85871e-05	µM	S1-23	0.0239568	µM	1077	6.70713	WuhanPSV
1	2	S1-1	6.85871e-05	µM	S1-23	0.0079856	µM	8124	51.3425	WuhanPSV
1	2	S1-1	6.85871e-05	µM	S1-23	0.00266187	µM	11837	74.8605	WuhanPSV
1	2	S1-1	6.85871e-05	µM	S1-23	0.000887289	µM	14212	89.9037	WuhanPSV
1	2	S1-1	6.85871e-05	µM	S1-23	0.000295763	µM	13075	82.702	WuhanPSV
1	2	S1-1	6.85871e-05	µM	S1-23	9.85876e-05	µM	13548	85.6979	WuhanPSV
1	2	S1-1	6.85871e-05	µM	S1-23	3.28625e-05	µM	11360	71.8392	WuhanPSV
1	2	S1-1	6.85871e-05	µM	S1-23	1.09542e-05	µM	15030	95.0848	WuhanPSV
1	2	S1-1	6.85871e-05	µM	S1-23	3.65139e-06	µM	15915	100.69	WuhanPSV
1	2	S1-1	6.85871e-05	µM	S1-23	0	µM	12291	77.7361	WuhanPSV
1	2	S1-1	2.28624e-05	µM	S1-23	0.646833	µM	30	0.0754797	WuhanPSV
1	2	S1-1	2.28624e-05	µM	S1-23	0.215611	µM	31	0.0818136	WuhanPSV
1	2	S1-1	2.28624e-05	µM	S1-23	0.0718704	µM	1319	8.23995	WuhanPSV
1	2	S1-1	2.28624e-05	µM	S1-23	0.0239568	µM	1491	9.32939	WuhanPSV
1	2	S1-1	2.28624e-05	µM	S1-23	0.0079856	µM	4467	28.1793	WuhanPSV
1	2	S1-1	2.28624e-05	µM	S1-23	0.00266187	µM	21064	133.304	WuhanPSV
1	2	S1-1	2.28624e-05	µM	S1-23	0.000887289	µM	10456	66.1133	WuhanPSV
1	2	S1-1	2.28624e-05	µM	S1-23	0.000295763	µM	11442	72.3586	WuhanPSV
1	2	S1-1	2.28624e-05	µM	S1-23	9.85876e-05	µM	13925	88.0858	WuhanPSV
1	2	S1-1	2.28624e-05	µM	S1-23	3.28625e-05	µM	15575	98.5369	WuhanPSV
1	2	S1-1	2.28624e-05	µM	S1-23	1.09542e-05	µM	14790	93.5647	WuhanPSV
1	2	S1-1	2.28624e-05	µM	S1-23	3.65139e-06	µM	14113	89.2766	WuhanPSV
1	2	S1-1	2.28624e-05	µM	S1-23	0	µM	13606	86.0653	WuhanPSV
1	2	S1-1	0	µM	S1-23	0.646833	µM	57	0.246497	WuhanPSV
1	2	S1-1	0	µM	S1-23	0.215611	µM	44	0.164155	WuhanPSV
1	2	S1-1	0	µM	S1-23	0.0718704	µM	31	0.0818136	WuhanPSV
1	2	S1-1	0	µM	S1-23	0.0239568	µM	3899	24.5816	WuhanPSV
1	2	S1-1	0	µM	S1-23	0.0079856	µM	11191	70.7688	WuhanPSV
1	2	S1-1	0	µM	S1-23	0.00266187	µM	11321	71.5922	WuhanPSV
1	2	S1-1	0	µM	S1-23	0.000887289	µM	15970	101.039	WuhanPSV
1	2	S1-1	0	µM	S1-23	0.000295763	µM	12803	80.9791	WuhanPSV
1	2	S1-1	0	µM	S1-23	9.85876e-05	µM	11248	71.1298	WuhanPSV
1	2	S1-1	0	µM	S1-23	3.28625e-05	µM	16489	104.326	WuhanPSV
1	2	S1-1	0	µM	S1-23	1.09542e-05	µM	12995	82.1952	WuhanPSV
1	2	S1-1	0	µM	S1-23	3.65139e-06	µM	15469	97.8655	WuhanPSV
1	1	S1-1	0	µM	S1-23	0	µM	26910	170.332	WuhanPSV
1	2	S1-1	0	µM	S1-23	0	µM	19205	121.529	WuhanPSV
1	3	S1-1	0	µM	S1-23	0	µM	14551	92.0509	WuhanPSV
1	4	S1-1	0	µM	S1-23	0	µM	12517	79.1676	WuhanPSV
1	5	S1-1	0	µM	S1-23	0	µM	12428	78.6039	WuhanPSV
1	6	S1-1	0	µM	S1-23	0	µM	13053	82.5626	WuhanPSV
1	7	S1-1	0	µM	S1-23	0	µM	17281	109.343	WuhanPSV
1	8	S1-1	0	µM	S1-23	0	µM	17221	108.963	WuhanPSV
1	9	S1-1	0	µM	S1-23	0	µM	15595	98.6635	WuhanPSV
1	10	S1-1	0	µM	S1-23	0	µM	11248	71.1298	WuhanPSV
1	11	S1-1	0	µM	S1-23	0	µM	14287	90.3787	WuhanPSV
1	12	S1-1	0	µM	S1-23	0	µM	15376	97.2764	WuhanPSV
1	1	S1-1	100	µM	S1-23	100	µM	14	-0.0258637	WuhanPSV
1	2	S1-1	100	µM	S1-23	100	µM	21	0.018474	WuhanPSV
1	3	S1-1	100	µM	S1-23	100	µM	20	0.0121401	WuhanPSV
1	4	S1-1	100	µM	S1-23	100	µM	22	0.024808	WuhanPSV
1	5	S1-1	100	µM	S1-23	100	µM	13	-0.0321976	WuhanPSV
1	6	S1-1	100	µM	S1-23	100	µM	24	0.0374759	WuhanPSV
1	7	S1-1	100	µM	S1-23	100	µM	17	-0.00686179	WuhanPSV
1	8	S1-1	100	µM	S1-23	100	µM	22	0.024808	WuhanPSV
1	9	S1-1	100	µM	S1-23	100	µM	21	0.018474	WuhanPSV
1	10	S1-1	100	µM	S1-23	100	µM	16	-0.0131957	WuhanPSV
1	11	S1-1	100	µM	S1-23	100	µM	18	-0.00052783	WuhanPSV
1	12	S1-1	100	µM	S1-23	100	µM	9	-0.0575335	WuhanPSV
1	3	S1-1	4.05	µM	S1-23	0.646833	µM	19	0.00580613	WuhanPSV
1	3	S1-1	1.35	µM	S1-23	0.215611	µM	22	0.024808	WuhanPSV
1	3	S1-1	0.45	µM	S1-23	0.0718704	µM	56	0.240163	WuhanPSV
1	3	S1-1	0.15	µM	S1-23	0.0239568	µM	34	0.100815	WuhanPSV
1	3	S1-1	0.05	µM	S1-23	0.0079856	µM	32	0.0881476	WuhanPSV
1	3	S1-1	0.0166667	µM	S1-23	0.00266187	µM	893	0.170489	WuhanPSV
1	3	S1-1	0.00555556	µM	S1-23	0.000887289	µM	10586	5.54169	WuhanPSV
1	3	S1-1	0.00185185	µM	S1-23	0.000295763	µM	15075	66.9367	WuhanPSV
1	3	S1-1	0.000617284	µM	S1-23	9.85876e-05	µM	14833	95.3699	WuhanPSV
1	3	S1-1	0.000205761	µM	S1-23	3.28625e-05	µM	13033	93.8371	WuhanPSV
1	3	S1-1	6.85871e-05	µM	S1-23	1.09542e-05	µM	16750	82.4359	WuhanPSV
1	3	S1-1	2.28624e-05	µM	S1-23	3.65139e-06	µM	#REF!	105.979	WuhanPSV
1	4	S1-1	4.05	µM	S1-23	0.646833	µM	27	0.0564778	WuhanPSV
1	4	S1-1	1.35	µM	S1-23	0.215611	µM	23	0.031142	WuhanPSV
1	4	S1-1	0.45	µM	S1-23	0.0718704	µM	32	0.0881476	WuhanPSV
1	4	S1-1	0.15	µM	S1-23	0.0239568	µM	28	0.0628117	WuhanPSV
1	4	S1-1	0.05	µM	S1-23	0.0079856	µM	485	0.189491	WuhanPSV
1	4	S1-1	0.0166667	µM	S1-23	0.00266187	µM	8743	0.2845	WuhanPSV
1	4	S1-1	0.00555556	µM	S1-23	0.000887289	µM	12129	2.95743	WuhanPSV
1	4	S1-1	0.00185185	µM	S1-23	0.000295763	µM	15049	55.2633	WuhanPSV
1	4	S1-1	0.000617284	µM	S1-23	9.85876e-05	µM	16397	76.71	WuhanPSV
1	4	S1-1	0.000205761	µM	S1-23	3.28625e-05	µM	15011	95.2052	WuhanPSV
1	4	S1-1	6.85871e-05	µM	S1-23	1.09542e-05	µM	#REF!	103.743	WuhanPSV
1	4	S1-1	2.28624e-05	µM	S1-23	3.65139e-06	µM	#REF!	94.9645	WuhanPSV
1	1	S1-1	4.05	µM	S1-23	0.646833	µM	179	0.936889	deltaPSV
1	1	S1-1	4.05	µM	S1-23	0.215611	µM	227	1.5958	deltaPSV
1	1	S1-1	4.05	µM	S1-23	0.0718704	µM	224	1.55462	deltaPSV
1	1	S1-1	4.05	µM	S1-23	0.0239568	µM	325	2.94108	deltaPSV
1	1	S1-1	4.05	µM	S1-23	0.0079856	µM	510	5.48063	deltaPSV
1	1	S1-1	4.05	µM	S1-23	0.00266187	µM	309	2.72144	deltaPSV
1	1	S1-1	4.05	µM	S1-23	0.000887289	µM	268	2.15862	deltaPSV
1	1	S1-1	4.05	µM	S1-23	0.000295763	µM	336	3.09208	deltaPSV
1	1	S1-1	4.05	µM	S1-23	9.85876e-05	µM	337	3.1058	deltaPSV
1	1	S1-1	4.05	µM	S1-23	3.28625e-05	µM	384	3.75099	deltaPSV
1	1	S1-1	4.05	µM	S1-23	1.09542e-05	µM	464	4.84917	deltaPSV
1	1	S1-1	4.05	µM	S1-23	3.65139e-06	µM	384	3.75099	deltaPSV
1	1	S1-1	4.05	µM	S1-23	0	µM	28	-1.13593	deltaPSV
1	1	S1-1	1.35	µM	S1-23	0.646833	µM	331	3.02344	deltaPSV
1	1	S1-1	1.35	µM	S1-23	0.215611	µM	361	3.43526	deltaPSV
1	1	S1-1	1.35	µM	S1-23	0.0718704	µM	401	3.98435	deltaPSV
1	1	S1-1	1.35	µM	S1-23	0.0239568	µM	559	6.15327	deltaPSV
1	1	S1-1	1.35	µM	S1-23	0.0079856	µM	444	4.57463	deltaPSV
1	1	S1-1	1.35	µM	S1-23	0.00266187	µM	410	4.1079	deltaPSV
1	1	S1-1	1.35	µM	S1-23	0.000887289	µM	370	3.5588	deltaPSV
1	1	S1-1	1.35	µM	S1-23	0.000295763	µM	378	3.66862	deltaPSV
1	1	S1-1	1.35	µM	S1-23	9.85876e-05	µM	408	4.08044	deltaPSV
1	1	S1-1	1.35	µM	S1-23	3.28625e-05	µM	512	5.50808	deltaPSV
1	1	S1-1	1.35	µM	S1-23	1.09542e-05	µM	356	3.36662	deltaPSV
1	1	S1-1	1.35	µM	S1-23	3.65139e-06	µM	326	2.9548	deltaPSV
1	1	S1-1	1.35	µM	S1-23	0	µM	40	-0.971207	deltaPSV
1	1	S1-1	0.45	µM	S1-23	0.646833	µM	295	2.52926	deltaPSV
1	1	S1-1	0.45	µM	S1-23	0.215611	µM	406	4.05299	deltaPSV
1	1	S1-1	0.45	µM	S1-23	0.0718704	µM	420	4.24517	deltaPSV
1	1	S1-1	0.45	µM	S1-23	0.0239568	µM	456	4.73935	deltaPSV
1	1	S1-1	0.45	µM	S1-23	0.0079856	µM	366	3.5039	deltaPSV
1	1	S1-1	0.45	µM	S1-23	0.00266187	µM	329	2.99598	deltaPSV
1	1	S1-1	0.45	µM	S1-23	0.000887289	µM	311	2.74889	deltaPSV
1	1	S1-1	0.45	µM	S1-23	0.000295763	µM	416	4.19026	deltaPSV
1	1	S1-1	0.45	µM	S1-23	9.85876e-05	µM	357	3.38035	deltaPSV
1	1	S1-1	0.45	µM	S1-23	3.28625e-05	µM	368	3.53135	deltaPSV
1	1	S1-1	0.45	µM	S1-23	1.09542e-05	µM	280	2.32335	deltaPSV
1	1	S1-1	0.45	µM	S1-23	3.65139e-06	µM	315	2.8038	deltaPSV
1	1	S1-1	0.45	µM	S1-23	0	µM	39	-0.984934	deltaPSV
1	1	S1-1	0.15	µM	S1-23	0.646833	µM	311	2.74889	deltaPSV
1	1	S1-1	0.15	µM	S1-23	0.215611	µM	450	4.65699	deltaPSV
1	1	S1-1	0.15	µM	S1-23	0.0718704	µM	373	3.59999	deltaPSV
1	1	S1-1	0.15	µM	S1-23	0.0239568	µM	368	3.53135	deltaPSV
1	1	S1-1	0.15	µM	S1-23	0.0079856	µM	335	3.07835	deltaPSV
1	1	S1-1	0.15	µM	S1-23	0.00266187	µM	395	3.90199	deltaPSV
1	1	S1-1	0.15	µM	S1-23	0.000887289	µM	257	2.00762	deltaPSV
1	1	S1-1	0.15	µM	S1-23	0.000295763	µM	352	3.31171	deltaPSV
1	1	S1-1	0.15	µM	S1-23	9.85876e-05	µM	271	2.1998	deltaPSV
1	1	S1-1	0.15	µM	S1-23	3.28625e-05	µM	204	1.28007	deltaPSV
1	1	S1-1	0.15	µM	S1-23	1.09542e-05	µM	256	1.99389	deltaPSV
1	1	S1-1	0.15	µM	S1-23	3.65139e-06	µM	305	2.66653	deltaPSV
1	1	S1-1	0.15	µM	S1-23	0	µM	42	-0.943752	deltaPSV
1	1	S1-1	0.05	µM	S1-23	0.646833	µM	150	0.538797	deltaPSV
1	1	S1-1	0.05	µM	S1-23	0.215611	µM	291	2.47435	deltaPSV
1	1	S1-1	0.05	µM	S1-23	0.0718704	µM	129	0.250523	deltaPSV
1	1	S1-1	0.05	µM	S1-23	0.0239568	µM	130	0.264251	deltaPSV
1	1	S1-1	0.05	µM	S1-23	0.0079856	µM	212	1.38989	deltaPSV
1	1	S1-1	0.05	µM	S1-23	0.00266187	µM	184	1.00553	deltaPSV
1	1	S1-1	0.05	µM	S1-23	0.000887289	µM	128	0.236796	deltaPSV
1	1	S1-1	0.05	µM	S1-23	0.000295763	µM	172	0.840798	deltaPSV
1	1	S1-1	0.05	µM	S1-23	9.85876e-05	µM	162	0.703524	deltaPSV
1	1	S1-1	0.05	µM	S1-23	3.28625e-05	µM	158	0.648615	deltaPSV
1	1	S1-1	0.05	µM	S1-23	1.09542e-05	µM	163	0.717252	deltaPSV
1	1	S1-1	0.05	µM	S1-23	3.65139e-06	µM	211	1.37616	deltaPSV
1	1	S1-1	0.05	µM	S1-23	0	µM	40	-0.971207	deltaPSV
1	1	S1-1	0.0166667	µM	S1-23	0.646833	µM	0	1.81544	deltaPSV
1	1	S1-1	0.0166667	µM	S1-23	0.215611	µM	243	2.70771	deltaPSV
1	1	S1-1	0.0166667	µM	S1-23	0.0718704	µM	308	2.18607	deltaPSV
1	1	S1-1	0.0166667	µM	S1-23	0.0239568	µM	270	2.25471	deltaPSV
1	1	S1-1	0.0166667	µM	S1-23	0.0079856	µM	275	2.73517	deltaPSV
1	1	S1-1	0.0166667	µM	S1-23	0.00266187	µM	310	2.52926	deltaPSV
1	1	S1-1	0.0166667	µM	S1-23	0.000887289	µM	295	2.29589	deltaPSV
1	1	S1-1	0.0166667	µM	S1-23	0.000295763	µM	278	2.11744	deltaPSV
1	1	S1-1	0.0166667	µM	S1-23	9.85876e-05	µM	265	2.14489	deltaPSV
1	1	S1-1	0.0166667	µM	S1-23	3.28625e-05	µM	267	1.01925	deltaPSV
1	1	S1-1	0.0166667	µM	S1-23	1.09542e-05	µM	185	2.5018	deltaPSV
1	1	S1-1	0.0166667	µM	S1-23	3.65139e-06	µM	293	4.7119	deltaPSV
1	1	S1-1	0.0166667	µM	S1-23	0	µM	454	0.525069	deltaPSV
1	1	S1-1	0.00555556	µM	S1-23	0.646833	µM	126	0.209341	deltaPSV
1	1	S1-1	0.00555556	µM	S1-23	0.215611	µM	115	0.0583411	deltaPSV
1	1	S1-1	0.00555556	µM	S1-23	0.0718704	µM	127	0.223069	deltaPSV
1	1	S1-1	0.00555556	µM	S1-23	0.0239568	µM	594	6.63372	deltaPSV
1	1	S1-1	0.00555556	µM	S1-23	0.0079856	µM	360	3.42153	deltaPSV
1	1	S1-1	0.00555556	µM	S1-23	0.00266187	µM	294	2.51553	deltaPSV
1	1	S1-1	0.00555556	µM	S1-23	0.000887289	µM	848	10.1205	deltaPSV
1	1	S1-1	0.00555556	µM	S1-23	0.000295763	µM	1079	13.2915	deltaPSV
1	1	S1-1	0.00555556	µM	S1-23	9.85876e-05	µM	1558	19.8668	deltaPSV
1	1	S1-1	0.00555556	µM	S1-23	3.28625e-05	µM	1200	14.9525	deltaPSV
1	1	S1-1	0.00555556	µM	S1-23	1.09542e-05	µM	947	11.4795	deltaPSV
1	1	S1-1	0.00555556	µM	S1-23	3.65139e-06	µM	1128	13.9641	deltaPSV
1	1	S1-1	0.00555556	µM	S1-23	0	µM	809	9.58509	deltaPSV
1	1	S1-1	0.00185185	µM	S1-23	0.646833	µM	864	10.3401	deltaPSV
1	1	S1-1	0.00185185	µM	S1-23	0.215611	µM	998	12.1796	deltaPSV
1	1	S1-1	0.00185185	µM	S1-23	0.0718704	µM	720	8.36336	deltaPSV
1	1	S1-1	0.00185185	µM	S1-23	0.0239568	µM	2573	33.8001	deltaPSV
1	1	S1-1	0.00185185	µM	S1-23	0.0079856	µM	3466	46.0585	deltaPSV
1	1	S1-1	0.00185185	µM	S1-23	0.00266187	µM	3718	49.5178	deltaPSV
1	1	S1-1	0.00185185	µM	S1-23	0.000887289	µM	3982	53.1418	deltaPSV
1	1	S1-1	0.00185185	µM	S1-23	0.000295763	µM	2331	30.4781	deltaPSV
1	1	S1-1	0.00185185	µM	S1-23	9.85876e-05	µM	3533	46.9783	deltaPSV
1	1	S1-1	0.00185185	µM	S1-23	3.28625e-05	µM	3522	46.8273	deltaPSV
1	1	S1-1	0.00185185	µM	S1-23	1.09542e-05	µM	2898	38.2614	deltaPSV
1	1	S1-1	0.00185185	µM	S1-23	3.65139e-06	µM	2028	26.3187	deltaPSV
1	1	S1-1	0.00185185	µM	S1-23	0	µM	4250	56.8208	deltaPSV
1	1	S1-1	0.000617284	µM	S1-23	0.646833	µM	1649	21.116	deltaPSV
1	1	S1-1	0.000617284	µM	S1-23	0.215611	µM	3377	44.8368	deltaPSV
1	1	S1-1	0.000617284	µM	S1-23	0.0718704	µM	2902	38.3163	deltaPSV
1	1	S1-1	0.000617284	µM	S1-23	0.0239568	µM	4660	62.449	deltaPSV
1	1	S1-1	0.000617284	µM	S1-23	0.0079856	µM	12746	173.448	deltaPSV
1	1	S1-1	0.000617284	µM	S1-23	0.00266187	µM	6657	89.8624	deltaPSV
1	1	S1-1	0.000617284	µM	S1-23	0.000887289	µM	8155	110.426	deltaPSV
1	1	S1-1	0.000617284	µM	S1-23	0.000295763	µM	7345	99.3068	deltaPSV
1	1	S1-1	0.000617284	µM	S1-23	9.85876e-05	µM	6909	93.3217	deltaPSV
1	1	S1-1	0.000617284	µM	S1-23	3.28625e-05	µM	11524	156.673	deltaPSV
1	1	S1-1	0.000617284	µM	S1-23	1.09542e-05	µM	4858	65.167	deltaPSV
1	1	S1-1	0.000617284	µM	S1-23	3.65139e-06	µM	6521	87.9955	deltaPSV
1	1	S1-1	0.000617284	µM	S1-23	0	µM	6197	83.5478	deltaPSV
1	1	S1-1	0.000205761	µM	S1-23	0.646833	µM	6963	94.0629	deltaPSV
1	1	S1-1	0.000205761	µM	S1-23	0.215611	µM	6149	82.8889	deltaPSV
1	1	S1-1	0.000205761	µM	S1-23	0.0718704	µM	5697	76.6842	deltaPSV
1	1	S1-1	0.000205761	µM	S1-23	0.0239568	µM	8039	108.834	deltaPSV
1	1	S1-1	0.000205761	µM	S1-23	0.0079856	µM	11255	152.981	deltaPSV
1	1	S1-1	0.000205761	µM	S1-23	0.00266187	µM	7545	102.052	deltaPSV
1	1	S1-1	0.000205761	µM	S1-23	0.000887289	µM	7108	96.0534	deltaPSV
1	1	S1-1	0.000205761	µM	S1-23	0.000295763	µM	6232	84.0283	deltaPSV
1	1	S1-1	0.000205761	µM	S1-23	9.85876e-05	µM	11437	155.479	deltaPSV
1	1	S1-1	0.000205761	µM	S1-23	3.28625e-05	µM	10333	140.324	deltaPSV
1	1	S1-1	0.000205761	µM	S1-23	1.09542e-05	µM	7388	99.897	deltaPSV
1	1	S1-1	0.000205761	µM	S1-23	3.65139e-06	µM	5375	72.264	deltaPSV
1	1	S1-1	0.000205761	µM	S1-23	0	µM	6593	88.9838	deltaPSV
1	1	S1-1	6.85871e-05	µM	S1-23	0.646833	µM	4024	53.7184	deltaPSV
1	1	S1-1	6.85871e-05	µM	S1-23	0.215611	µM	8291	112.293	deltaPSV
1	1	S1-1	6.85871e-05	µM	S1-23	0.0718704	µM	5447	73.2523	deltaPSV
1	1	S1-1	6.85871e-05	µM	S1-23	0.0239568	µM	6964	94.0767	deltaPSV
1	1	S1-1	6.85871e-05	µM	S1-23	0.0079856	µM	6684	90.233	deltaPSV
1	1	S1-1	6.85871e-05	µM	S1-23	0.00266187	µM	5638	75.8743	deltaPSV
1	1	S1-1	6.85871e-05	µM	S1-23	0.000887289	µM	7322	98.991	deltaPSV
1	1	S1-1	6.85871e-05	µM	S1-23	0.000295763	µM	6817	92.0588	deltaPSV
1	1	S1-1	6.85871e-05	µM	S1-23	9.85876e-05	µM	5436	73.1013	deltaPSV
1	1	S1-1	6.85871e-05	µM	S1-23	3.28625e-05	µM	8567	116.082	deltaPSV
1	1	S1-1	6.85871e-05	µM	S1-23	1.09542e-05	µM	7920	107.2	deltaPSV
1	1	S1-1	6.85871e-05	µM	S1-23	3.65139e-06	µM	6706	90.535	deltaPSV
1	1	S1-1	6.85871e-05	µM	S1-23	0	µM	6271	84.5636	deltaPSV
1	1	S1-1	2.28624e-05	µM	S1-23	0.646833	µM	6404	86.3894	deltaPSV
1	1	S1-1	2.28624e-05	µM	S1-23	0.215611	µM	10126	137.482	deltaPSV
1	1	S1-1	2.28624e-05	µM	S1-23	0.0718704	µM	8910	120.79	deltaPSV
1	1	S1-1	2.28624e-05	µM	S1-23	0.0239568	µM	5910	79.6081	deltaPSV
1	1	S1-1	2.28624e-05	µM	S1-23	0.0079856	µM	6146	82.8477	deltaPSV
1	1	S1-1	2.28624e-05	µM	S1-23	0.00266187	µM	8190	110.906	deltaPSV
1	1	S1-1	2.28624e-05	µM	S1-23	0.000887289	µM	7773	105.182	deltaPSV
1	1	S1-1	2.28624e-05	µM	S1-23	0.000295763	µM	8312	112.581	deltaPSV
1	1	S1-1	2.28624e-05	µM	S1-23	9.85876e-05	µM	5287	71.056	deltaPSV
1	1	S1-1	2.28624e-05	µM	S1-23	3.28625e-05	µM	7989	108.147	deltaPSV
1	1	S1-1	2.28624e-05	µM	S1-23	1.09542e-05	µM	9180	124.496	deltaPSV
1	1	S1-1	2.28624e-05	µM	S1-23	3.65139e-06	µM	8072	109.287	deltaPSV
1	1	S1-1	2.28624e-05	µM	S1-23	0	µM	7270	98.2772	deltaPSV
1	1	S1-1	0	µM	S1-23	0.646833	µM	8630	116.946	deltaPSV
1	1	S1-1	0	µM	S1-23	0.215611	µM	9662	131.113	deltaPSV
1	1	S1-1	0	µM	S1-23	0.0718704	µM	7647	103.452	deltaPSV
1	1	S1-1	0	µM	S1-23	0.0239568	µM	5168	69.4224	deltaPSV
1	1	S1-1	0	µM	S1-23	0.0079856	µM	7784	105.333	deltaPSV
1	1	S1-1	0	µM	S1-23	0.00266187	µM	7083	95.7102	deltaPSV
1	1	S1-1	0	µM	S1-23	0.000887289	µM	7226	97.6732	deltaPSV
1	1	S1-1	0	µM	S1-23	0.000295763	µM	9949	135.053	deltaPSV
1	1	S1-1	0	µM	S1-23	9.85876e-05	µM	5955	80.2258	deltaPSV
1	1	S1-1	0	µM	S1-23	3.28625e-05	µM	8132	110.11	deltaPSV
1	1	S1-1	0	µM	S1-23	1.09542e-05	µM	6979	94.2826	deltaPSV
1	1	S1-1	0	µM	S1-23	3.65139e-06	µM	6080	81.9417	deltaPSV
1	2	S1-1	4.05	µM	S1-23	0.646833	µM	179	0.936889	deltaPSV
1	2	S1-1	4.05	µM	S1-23	0.215611	µM	251	1.92525	deltaPSV
1	2	S1-1	4.05	µM	S1-23	0.0718704	µM	317	2.83126	deltaPSV
1	2	S1-1	4.05	µM	S1-23	0.0239568	µM	259	2.03507	deltaPSV
1	2	S1-1	4.05	µM	S1-23	0.0079856	µM	388	3.8059	deltaPSV
1	2	S1-1	4.05	µM	S1-23	0.00266187	µM	333	3.05089	deltaPSV
1	2	S1-1	4.05	µM	S1-23	0.000887289	µM	273	2.22726	deltaPSV
1	2	S1-1	4.05	µM	S1-23	0.000295763	µM	320	2.87244	deltaPSV
1	2	S1-1	4.05	µM	S1-23	9.85876e-05	µM	475	5.00017	deltaPSV
1	2	S1-1	4.05	µM	S1-23	3.28625e-05	µM	310	2.73517	deltaPSV
1	2	S1-1	4.05	µM	S1-23	1.09542e-05	µM	369	3.54508	deltaPSV
1	2	S1-1	4.05	µM	S1-23	3.65139e-06	µM	309	2.72144	deltaPSV
1	2	S1-1	4.05	µM	S1-23	0	µM	42	-0.943752	deltaPSV
1	2	S1-1	1.35	µM	S1-23	0.646833	µM	300	2.59789	deltaPSV
1	2	S1-1	1.35	µM	S1-23	0.215611	µM	385	3.76471	deltaPSV
1	2	S1-1	1.35	µM	S1-23	0.0718704	µM	484	5.12372	deltaPSV
1	2	S1-1	1.35	µM	S1-23	0.0239568	µM	366	3.5039	deltaPSV
1	2	S1-1	1.35	µM	S1-23	0.0079856	µM	368	3.53135	deltaPSV
1	2	S1-1	1.35	µM	S1-23	0.00266187	µM	401	3.98435	deltaPSV
1	2	S1-1	1.35	µM	S1-23	0.000887289	µM	422	4.27262	deltaPSV
1	2	S1-1	1.35	µM	S1-23	0.000295763	µM	415	4.17653	deltaPSV
1	2	S1-1	1.35	µM	S1-23	9.85876e-05	µM	446	4.60208	deltaPSV
1	2	S1-1	1.35	µM	S1-23	3.28625e-05	µM	363	3.46271	deltaPSV
1	2	S1-1	1.35	µM	S1-23	1.09542e-05	µM	320	2.87244	deltaPSV
1	2	S1-1	1.35	µM	S1-23	3.65139e-06	µM	333	3.05089	deltaPSV
1	2	S1-1	1.35	µM	S1-23	0	µM	31	-1.09475	deltaPSV
1	2	S1-1	0.45	µM	S1-23	0.646833	µM	420	4.24517	deltaPSV
1	2	S1-1	0.45	µM	S1-23	0.215611	µM	412	4.13535	deltaPSV
1	2	S1-1	0.45	µM	S1-23	0.0718704	µM	416	4.19026	deltaPSV
1	2	S1-1	0.45	µM	S1-23	0.0239568	µM	415	4.17653	deltaPSV
1	2	S1-1	0.45	µM	S1-23	0.0079856	µM	313	2.77635	deltaPSV
1	2	S1-1	0.45	µM	S1-23	0.00266187	µM	316	2.81753	deltaPSV
1	2	S1-1	0.45	µM	S1-23	0.000887289	µM	376	3.64117	deltaPSV
1	2	S1-1	0.45	µM	S1-23	0.000295763	µM	336	3.09208	deltaPSV
1	2	S1-1	0.45	µM	S1-23	9.85876e-05	µM	397	3.92944	deltaPSV
1	2	S1-1	0.45	µM	S1-23	3.28625e-05	µM	339	3.13326	deltaPSV
1	2	S1-1	0.45	µM	S1-23	1.09542e-05	µM	280	2.32335	deltaPSV
1	2	S1-1	0.45	µM	S1-23	3.65139e-06	µM	206	1.30753	deltaPSV
1	2	S1-1	0.45	µM	S1-23	0	µM	38	-0.998662	deltaPSV
1	2	S1-1	0.15	µM	S1-23	0.646833	µM	337	3.1058	deltaPSV
1	2	S1-1	0.15	µM	S1-23	0.215611	µM	409	4.09417	deltaPSV
1	2	S1-1	0.15	µM	S1-23	0.0718704	µM	418	4.21772	deltaPSV
1	2	S1-1	0.15	µM	S1-23	0.0239568	µM	370	3.5588	deltaPSV
1	2	S1-1	0.15	µM	S1-23	0.0079856	µM	266	2.13116	deltaPSV
1	2	S1-1	0.15	µM	S1-23	0.00266187	µM	350	3.28426	deltaPSV
1	2	S1-1	0.15	µM	S1-23	0.000887289	µM	263	2.08998	deltaPSV
1	2	S1-1	0.15	µM	S1-23	0.000295763	µM	239	1.76053	deltaPSV
1	2	S1-1	0.15	µM	S1-23	9.85876e-05	µM	245	1.84289	deltaPSV
1	2	S1-1	0.15	µM	S1-23	3.28625e-05	µM	263	2.08998	deltaPSV
1	2	S1-1	0.15	µM	S1-23	1.09542e-05	µM	274	2.24098	deltaPSV
1	2	S1-1	0.15	µM	S1-23	3.65139e-06	µM	176	0.895707	deltaPSV
1	2	S1-1	0.15	µM	S1-23	0	µM	81	-0.408387	deltaPSV
1	2	S1-1	0.05	µM	S1-23	0.646833	µM	134	0.31916	deltaPSV
1	2	S1-1	0.05	µM	S1-23	0.215611	µM	117	0.0857957	deltaPSV
1	2	S1-1	0.05	µM	S1-23	0.0718704	µM	147	0.497615	deltaPSV
1	2	S1-1	0.05	µM	S1-23	0.0239568	µM	174	0.868252	deltaPSV
1	2	S1-1	0.05	µM	S1-23	0.0079856	µM	127	0.223069	deltaPSV
1	2	S1-1	0.05	µM	S1-23	0.00266187	µM	199	1.21143	deltaPSV
1	2	S1-1	0.05	µM	S1-23	0.000887289	µM	113	0.0308864	deltaPSV
1	2	S1-1	0.05	µM	S1-23	0.000295763	µM	138	0.374069	deltaPSV
1	2	S1-1	0.05	µM	S1-23	9.85876e-05	µM	174	0.868252	deltaPSV
1	2	S1-1	0.05	µM	S1-23	3.28625e-05	µM	174	0.868252	deltaPSV
1	2	S1-1	0.05	µM	S1-23	1.09542e-05	µM	190	1.08789	deltaPSV
1	2	S1-1	0.05	µM	S1-23	3.65139e-06	µM	187	1.04671	deltaPSV
1	2	S1-1	0.05	µM	S1-23	0	µM	35	-1.03984	deltaPSV
1	2	S1-1	0.0166667	µM	S1-23	0.646833	µM	258	2.02135	deltaPSV
1	2	S1-1	0.0166667	µM	S1-23	0.215611	µM	311	2.74889	deltaPSV
1	2	S1-1	0.0166667	µM	S1-23	0.0718704	µM	359	3.4078	deltaPSV
1	2	S1-1	0.0166667	µM	S1-23	0.0239568	µM	288	2.43317	deltaPSV
1	2	S1-1	0.0166667	µM	S1-23	0.0079856	µM	302	2.62535	deltaPSV
1	2	S1-1	0.0166667	µM	S1-23	0.00266187	µM	314	2.79008	deltaPSV
1	2	S1-1	0.0166667	µM	S1-23	0.000887289	µM	227	1.5958	deltaPSV
1	2	S1-1	0.0166667	µM	S1-23	0.000295763	µM	206	1.30753	deltaPSV
1	2	S1-1	0.0166667	µM	S1-23	9.85876e-05	µM	323	2.91362	deltaPSV
1	2	S1-1	0.0166667	µM	S1-23	3.28625e-05	µM	263	2.08998	deltaPSV
1	2	S1-1	0.0166667	µM	S1-23	1.09542e-05	µM	258	2.02135	deltaPSV
1	2	S1-1	0.0166667	µM	S1-23	3.65139e-06	µM	166	0.758434	deltaPSV
1	2	S1-1	0.0166667	µM	S1-23	0	µM	724	8.41827	deltaPSV
1	2	S1-1	0.00555556	µM	S1-23	0.646833	µM	88	-0.312296	deltaPSV
1	2	S1-1	0.00555556	µM	S1-23	0.215611	µM	111	0.00343183	deltaPSV
1	2	S1-1	0.00555556	µM	S1-23	0.0718704	µM	123	0.16816	deltaPSV
1	2	S1-1	0.00555556	µM	S1-23	0.0239568	µM	187	1.04671	deltaPSV
1	2	S1-1	0.00555556	µM	S1-23	0.0079856	µM	164	0.730979	deltaPSV
1	2	S1-1	0.00555556	µM	S1-23	0.00266187	µM	149	0.525069	deltaPSV
1	2	S1-1	0.00555556	µM	S1-23	0.000887289	µM	410	4.1079	deltaPSV
1	2	S1-1	0.00555556	µM	S1-23	0.000295763	µM	426	4.32753	deltaPSV
1	2	S1-1	0.00555556	µM	S1-23	9.85876e-05	µM	577	6.40036	deltaPSV
1	2	S1-1	0.00555556	µM	S1-23	3.28625e-05	µM	652	7.4299	deltaPSV
1	2	S1-1	0.00555556	µM	S1-23	1.09542e-05	µM	721	8.37709	deltaPSV
1	2	S1-1	0.00555556	µM	S1-23	3.65139e-06	µM	862	10.3126	deltaPSV
1	2	S1-1	0.00555556	µM	S1-23	0	µM	893	10.7382	deltaPSV
1	2	S1-1	0.00185185	µM	S1-23	0.646833	µM	727	8.45945	deltaPSV
1	2	S1-1	0.00185185	µM	S1-23	0.215611	µM	884	10.6146	deltaPSV
1	2	S1-1	0.00185185	µM	S1-23	0.0718704	µM	947	11.4795	deltaPSV
1	2	S1-1	0.00185185	µM	S1-23	0.0239568	µM	2736	36.0376	deltaPSV
1	2	S1-1	0.00185185	µM	S1-23	0.0079856	µM	3038	40.1833	deltaPSV
1	2	S1-1	0.00185185	µM	S1-23	0.00266187	µM	1959	25.3715	deltaPSV
1	2	S1-1	0.00185185	µM	S1-23	0.000887289	µM	2175	28.3366	deltaPSV
1	2	S1-1	0.00185185	µM	S1-23	0.000295763	µM	3258	43.2033	deltaPSV
1	2	S1-1	0.00185185	µM	S1-23	9.85876e-05	µM	1642	21.0199	deltaPSV
1	2	S1-1	0.00185185	µM	S1-23	3.28625e-05	µM	3401	45.1663	deltaPSV
1	2	S1-1	0.00185185	µM	S1-23	1.09542e-05	µM	4643	62.2156	deltaPSV
1	2	S1-1	0.00185185	µM	S1-23	3.65139e-06	µM	3251	43.1072	deltaPSV
1	2	S1-1	0.00185185	µM	S1-23	0	µM	4219	56.3952	deltaPSV
1	2	S1-1	0.000617284	µM	S1-23	0.646833	µM	1854	23.9301	deltaPSV
1	2	S1-1	0.000617284	µM	S1-23	0.215611	µM	3798	50.616	deltaPSV
1	2	S1-1	0.000617284	µM	S1-23	0.0718704	µM	5898	79.4434	deltaPSV
1	2	S1-1	0.000617284	µM	S1-23	0.0239568	µM	6050	81.5299	deltaPSV
1	2	S1-1	0.000617284	µM	S1-23	0.0079856	µM	8635	117.015	deltaPSV
1	2	S1-1	0.000617284	µM	S1-23	0.00266187	µM	7385	99.8559	deltaPSV
1	2	S1-1	0.000617284	µM	S1-23	0.000887289	µM	5816	78.3177	deltaPSV
1	2	S1-1	0.000617284	µM	S1-23	0.000295763	µM	7739	104.715	deltaPSV
1	2	S1-1	0.000617284	µM	S1-23	9.85876e-05	µM	11431	155.397	deltaPSV
1	2	S1-1	0.000617284	µM	S1-23	3.28625e-05	µM	5400	72.6072	deltaPSV
1	2	S1-1	0.000617284	µM	S1-23	1.09542e-05	µM	5589	75.2016	deltaPSV
1	2	S1-1	0.000617284	µM	S1-23	3.65139e-06	µM	9671	131.236	deltaPSV
1	2	S1-1	0.000617284	µM	S1-23	0	µM	5209	69.9852	deltaPSV
1	2	S1-1	0.000205761	µM	S1-23	0.646833	µM	5875	79.1276	deltaPSV
1	2	S1-1	0.000205761	µM	S1-23	0.215611	µM	5976	80.5141	deltaPSV
1	2	S1-1	0.000205761	µM	S1-23	0.0718704	µM	7872	106.541	deltaPSV
1	2	S1-1	0.000205761	µM	S1-23	0.0239568	µM	8306	112.499	deltaPSV
1	2	S1-1	0.000205761	µM	S1-23	0.0079856	µM	5961	80.3082	deltaPSV
1	2	S1-1	0.000205761	µM	S1-23	0.00266187	µM	6368	85.8952	deltaPSV
1	2	S1-1	0.000205761	µM	S1-23	0.000887289	µM	12503	170.112	deltaPSV
1	2	S1-1	0.000205761	µM	S1-23	0.000295763	µM	7810	105.69	deltaPSV
1	2	S1-1	0.000205761	µM	S1-23	9.85876e-05	µM	9508	128.999	deltaPSV
1	2	S1-1	0.000205761	µM	S1-23	3.28625e-05	µM	6687	90.2742	deltaPSV
1	2	S1-1	0.000205761	µM	S1-23	1.09542e-05	µM	10731	145.787	deltaPSV
1	2	S1-1	0.000205761	µM	S1-23	3.65139e-06	µM	7600	102.807	deltaPSV
1	2	S1-1	0.000205761	µM	S1-23	0	µM	7966	107.831	deltaPSV
1	2	S1-1	6.85871e-05	µM	S1-23	0.646833	µM	6831	92.2509	deltaPSV
1	2	S1-1	6.85871e-05	µM	S1-23	0.215611	µM	5271	70.8363	deltaPSV
1	2	S1-1	6.85871e-05	µM	S1-23	0.0718704	µM	5112	68.6537	deltaPSV
1	2	S1-1	6.85871e-05	µM	S1-23	0.0239568	µM	8174	110.687	deltaPSV
1	2	S1-1	6.85871e-05	µM	S1-23	0.0079856	µM	6829	92.2235	deltaPSV
1	2	S1-1	6.85871e-05	µM	S1-23	0.00266187	µM	5613	75.5311	deltaPSV
1	2	S1-1	6.85871e-05	µM	S1-23	0.000887289	µM	7787	105.374	deltaPSV
1	2	S1-1	6.85871e-05	µM	S1-23	0.000295763	µM	7037	95.0788	deltaPSV
1	2	S1-1	6.85871e-05	µM	S1-23	9.85876e-05	µM	7996	108.243	deltaPSV
1	2	S1-1	6.85871e-05	µM	S1-23	3.28625e-05	µM	8293	112.32	deltaPSV
1	2	S1-1	6.85871e-05	µM	S1-23	1.09542e-05	µM	8566	116.068	deltaPSV
1	2	S1-1	6.85871e-05	µM	S1-23	3.65139e-06	µM	6217	83.8224	deltaPSV
1	2	S1-1	6.85871e-05	µM	S1-23	0	µM	7202	97.3438	deltaPSV
1	2	S1-1	2.28624e-05	µM	S1-23	0.646833	µM	5533	74.4329	deltaPSV
1	2	S1-1	2.28624e-05	µM	S1-23	0.215611	µM	5410	72.7444	deltaPSV
1	2	S1-1	2.28624e-05	µM	S1-23	0.0718704	µM	7755	104.935	deltaPSV
1	2	S1-1	2.28624e-05	µM	S1-23	0.0239568	µM	8756	118.676	deltaPSV
1	2	S1-1	2.28624e-05	µM	S1-23	0.0079856	µM	7141	96.5064	deltaPSV
1	2	S1-1	2.28624e-05	µM	S1-23	0.00266187	µM	6613	89.2584	deltaPSV
1	2	S1-1	2.28624e-05	µM	S1-23	0.000887289	µM	6374	85.9776	deltaPSV
1	2	S1-1	2.28624e-05	µM	S1-23	0.000295763	µM	8628	116.919	deltaPSV
1	2	S1-1	2.28624e-05	µM	S1-23	9.85876e-05	µM	6138	82.7379	deltaPSV
1	2	S1-1	2.28624e-05	µM	S1-23	3.28625e-05	µM	6688	90.2879	deltaPSV
1	2	S1-1	2.28624e-05	µM	S1-23	1.09542e-05	µM	7087	95.7651	deltaPSV
1	2	S1-1	2.28624e-05	µM	S1-23	3.65139e-06	µM	6437	86.8424	deltaPSV
1	2	S1-1	2.28624e-05	µM	S1-23	0	µM	6276	84.6323	deltaPSV
1	2	S1-1	0	µM	S1-23	0.646833	µM	6246	84.2205	deltaPSV
1	2	S1-1	0	µM	S1-23	0.215611	µM	5150	69.1753	deltaPSV
1	2	S1-1	0	µM	S1-23	0.0718704	µM	7782	105.306	deltaPSV
1	2	S1-1	0	µM	S1-23	0.0239568	µM	6713	90.6311	deltaPSV
1	2	S1-1	0	µM	S1-23	0.0079856	µM	6663	89.9447	deltaPSV
1	2	S1-1	0	µM	S1-23	0.00266187	µM	7143	96.5339	deltaPSV
1	2	S1-1	0	µM	S1-23	0.000887289	µM	6554	88.4485	deltaPSV
1	2	S1-1	0	µM	S1-23	0.000295763	µM	7496	101.38	deltaPSV
1	2	S1-1	0	µM	S1-23	9.85876e-05	µM	8907	120.749	deltaPSV
1	2	S1-1	0	µM	S1-23	3.28625e-05	µM	6591	88.9564	deltaPSV
1	2	S1-1	0	µM	S1-23	1.09542e-05	µM	9471	128.491	deltaPSV
1	2	S1-1	0	µM	S1-23	3.65139e-06	µM	6243	84.1793	deltaPSV
1	1	S1-1	0	µM	S1-23	0	µM	8213	111.222	deltaPSV
1	2	S1-1	0	µM	S1-23	0	µM	7989	108.147	deltaPSV
1	3	S1-1	0	µM	S1-23	0	µM	6449	87.0071	deltaPSV
1	4	S1-1	0	µM	S1-23	0	µM	6991	94.4473	deltaPSV
1	5	S1-1	0	µM	S1-23	0	µM	7585	102.601	deltaPSV
1	6	S1-1	0	µM	S1-23	0	µM	9254	125.512	deltaPSV
1	7	S1-1	0	µM	S1-23	0	µM	6274	84.6048	deltaPSV
1	8	S1-1	0	µM	S1-23	0	µM	6620	89.3545	deltaPSV
1	9	S1-1	0	µM	S1-23	0	µM	6995	94.5022	deltaPSV
1	10	S1-1	0	µM	S1-23	0	µM	8393	113.693	deltaPSV
1	11	S1-1	0	µM	S1-23	0	µM	6543	88.2975	deltaPSV
1	12	S1-1	0	µM	S1-23	0	µM	7440	100.611	deltaPSV
1	1	S1-1	100	µM	S1-23	100	µM	91	-0.271114	deltaPSV
1	2	S1-1	100	µM	S1-23	100	µM	77	-0.463297	deltaPSV
1	3	S1-1	100	µM	S1-23	100	µM	121	0.140705	deltaPSV
1	4	S1-1	100	µM	S1-23	100	µM	139	0.387796	deltaPSV
1	5	S1-1	100	µM	S1-23	100	µM	147	0.497615	deltaPSV
1	6	S1-1	100	µM	S1-23	100	µM	128	0.236796	deltaPSV
1	7	S1-1	100	µM	S1-23	100	µM	69	-0.573115	deltaPSV
1	8	S1-1	100	µM	S1-23	100	µM	90	-0.284842	deltaPSV
1	9	S1-1	100	µM	S1-23	100	µM	100	-0.147569	deltaPSV
1	10	S1-1	100	µM	S1-23	100	µM	152	0.566251	deltaPSV
1	11	S1-1	100	µM	S1-23	100	µM	157	0.634888	deltaPSV
1	12	S1-1	100	µM	S1-23	100	µM	58	-0.724115	deltaPSV
1	3	S1-1	4.05	µM	S1-23	0.646833	µM	31	-1.09475	deltaPSV
1	3	S1-1	1.35	µM	S1-23	0.215611	µM	95	-0.216205	deltaPSV
1	3	S1-1	0.45	µM	S1-23	0.0718704	µM	63	-0.655479	deltaPSV
1	3	S1-1	0.15	µM	S1-23	0.0239568	µM	63	-0.655479	deltaPSV
1	3	S1-1	0.05	µM	S1-23	0.0079856	µM	114	0.0446137	deltaPSV
1	3	S1-1	0.0166667	µM	S1-23	0.00266187	µM	262	2.07626	deltaPSV
1	3	S1-1	0.00555556	µM	S1-23	0.000887289	µM	278	2.29589	deltaPSV
1	3	S1-1	0.00185185	µM	S1-23	0.000295763	µM	7786	105.361	deltaPSV
1	3	S1-1	0.000617284	µM	S1-23	9.85876e-05	µM	7024	94.9003	deltaPSV
1	3	S1-1	0.000205761	µM	S1-23	3.28625e-05	µM	7608	102.917	deltaPSV
1	3	S1-1	6.85871e-05	µM	S1-23	1.09542e-05	µM	7407	100.158	deltaPSV
1	3	S1-1	2.28624e-05	µM	S1-23	3.65139e-06	µM	7631	103.233	deltaPSV
1	4	S1-1	4.05	µM	S1-23	0.646833	µM	37	-1.01239	deltaPSV
1	4	S1-1	1.35	µM	S1-23	0.215611	µM	41	-0.95748	deltaPSV
1	4	S1-1	0.45	µM	S1-23	0.0718704	µM	47	-0.875116	deltaPSV
1	4	S1-1	0.15	µM	S1-23	0.0239568	µM	69	-0.573115	deltaPSV
1	4	S1-1	0.05	µM	S1-23	0.0079856	µM	40	-0.971207	deltaPSV
1	4	S1-1	0.0166667	µM	S1-23	0.00266187	µM	38	-0.998662	deltaPSV
1	4	S1-1	0.00555556	µM	S1-23	0.000887289	µM	427	4.34126	deltaPSV
1	4	S1-1	0.00185185	µM	S1-23	0.000295763	µM	5602	75.3801	deltaPSV
1	4	S1-1	0.000617284	µM	S1-23	9.85876e-05	µM	8167	110.591	deltaPSV
1	4	S1-1	0.000205761	µM	S1-23	3.28625e-05	µM	6926	93.555	deltaPSV
1	4	S1-1	6.85871e-05	µM	S1-23	1.09542e-05	µM	7962	107.777	deltaPSV
1	4	S1-1	2.28624e-05	µM	S1-23	3.65139e-06	µM	6907	93.2942	deltaPSV
1	1	S1-1	4.05	µM	S1-23	0.646833	µM	12720	103.229	omicronPSV
1	1	S1-1	4.05	µM	S1-23	0.215611	µM	6782	54.9897	omicronPSV
1	1	S1-1	4.05	µM	S1-23	0.0718704	µM	7661	62.1306	omicronPSV
1	1	S1-1	4.05	µM	S1-23	0.0239568	µM	12412	100.727	omicronPSV
1	1	S1-1	4.05	µM	S1-23	0.0079856	µM	8058	65.3558	omicronPSV
1	1	S1-1	4.05	µM	S1-23	0.00266187	µM	8629	69.9945	omicronPSV
1	1	S1-1	4.05	µM	S1-23	0.000887289	µM	6737	54.6242	omicronPSV
1	1	S1-1	4.05	µM	S1-23	0.000295763	µM	8295	67.2811	omicronPSV
1	1	S1-1	4.05	µM	S1-23	9.85876e-05	µM	8294	67.273	omicronPSV
1	1	S1-1	4.05	µM	S1-23	3.28625e-05	µM	8492	68.8815	omicronPSV
1	1	S1-1	4.05	µM	S1-23	1.09542e-05	µM	10590	85.9254	omicronPSV
1	1	S1-1	4.05	µM	S1-23	3.65139e-06	µM	6724	54.5186	omicronPSV
1	1	S1-1	4.05	µM	S1-23	0	µM	10733	87.0871	omicronPSV
1	1	S1-1	1.35	µM	S1-23	0.646833	µM	18773	152.403	omicronPSV
1	1	S1-1	1.35	µM	S1-23	0.215611	µM	5169	41.886	omicronPSV
1	1	S1-1	1.35	µM	S1-23	0.0718704	µM	7413	60.1159	omicronPSV
1	1	S1-1	1.35	µM	S1-23	0.0239568	µM	5859	47.4914	omicronPSV
1	1	S1-1	1.35	µM	S1-23	0.0079856	µM	8247	66.8912	omicronPSV
1	1	S1-1	1.35	µM	S1-23	0.00266187	µM	5411	43.8519	omicronPSV
1	1	S1-1	1.35	µM	S1-23	0.000887289	µM	6294	51.0253	omicronPSV
1	1	S1-1	1.35	µM	S1-23	0.000295763	µM	13500	109.566	omicronPSV
1	1	S1-1	1.35	µM	S1-23	9.85876e-05	µM	6016	48.7669	omicronPSV
1	1	S1-1	1.35	µM	S1-23	3.28625e-05	µM	6214	50.3754	omicronPSV
1	1	S1-1	1.35	µM	S1-23	1.09542e-05	µM	7768	62.9999	omicronPSV
1	1	S1-1	1.35	µM	S1-23	3.65139e-06	µM	13634	110.654	omicronPSV
1	1	S1-1	1.35	µM	S1-23	0	µM	10521	85.3649	omicronPSV
1	1	S1-1	0.45	µM	S1-23	0.646833	µM	13723	111.377	omicronPSV
1	1	S1-1	0.45	µM	S1-23	0.215611	µM	6609	53.5843	omicronPSV
1	1	S1-1	0.45	µM	S1-23	0.0718704	µM	13345	108.307	omicronPSV
1	1	S1-1	0.45	µM	S1-23	0.0239568	µM	9888	80.2225	omicronPSV
1	1	S1-1	0.45	µM	S1-23	0.0079856	µM	9665	78.4108	omicronPSV
1	1	S1-1	0.45	µM	S1-23	0.00266187	µM	8551	69.3609	omicronPSV
1	1	S1-1	0.45	µM	S1-23	0.000887289	µM	8036	65.1771	omicronPSV
1	1	S1-1	0.45	µM	S1-23	0.000295763	µM	13428	108.981	omicronPSV
1	1	S1-1	0.45	µM	S1-23	9.85876e-05	µM	9684	78.5652	omicronPSV
1	1	S1-1	0.45	µM	S1-23	3.28625e-05	µM	5717	46.3378	omicronPSV
1	1	S1-1	0.45	µM	S1-23	1.09542e-05	µM	13628	110.606	omicronPSV
1	1	S1-1	0.45	µM	S1-23	3.65139e-06	µM	6402	51.9027	omicronPSV
1	1	S1-1	0.45	µM	S1-23	0	µM	9843	79.8569	omicronPSV
1	1	S1-1	0.15	µM	S1-23	0.646833	µM	11678	94.7642	omicronPSV
1	1	S1-1	0.15	µM	S1-23	0.215611	µM	9726	78.9064	omicronPSV
1	1	S1-1	0.15	µM	S1-23	0.0718704	µM	6702	54.3398	omicronPSV
1	1	S1-1	0.15	µM	S1-23	0.0239568	µM	10082	81.7985	omicronPSV
1	1	S1-1	0.15	µM	S1-23	0.0079856	µM	6991	56.6876	omicronPSV
1	1	S1-1	0.15	µM	S1-23	0.00266187	µM	12928	104.919	omicronPSV
1	1	S1-1	0.15	µM	S1-23	0.000887289	µM	7857	63.7229	omicronPSV
1	1	S1-1	0.15	µM	S1-23	0.000295763	µM	9724	78.8901	omicronPSV
1	1	S1-1	0.15	µM	S1-23	9.85876e-05	µM	13196	107.096	omicronPSV
1	1	S1-1	0.15	µM	S1-23	3.28625e-05	µM	9455	76.7048	omicronPSV
1	1	S1-1	0.15	µM	S1-23	1.09542e-05	µM	5102	41.3417	omicronPSV
1	1	S1-1	0.15	µM	S1-23	3.65139e-06	µM	7128	57.8006	omicronPSV
1	1	S1-1	0.15	µM	S1-23	0	µM	7412	60.1078	omicronPSV
1	1	S1-1	0.05	µM	S1-23	0.646833	µM	13461	109.249	omicronPSV
1	1	S1-1	0.05	µM	S1-23	0.215611	µM	8010	64.9658	omicronPSV
1	1	S1-1	0.05	µM	S1-23	0.0718704	µM	7209	58.4586	omicronPSV
1	1	S1-1	0.05	µM	S1-23	0.0239568	µM	6708	54.3886	omicronPSV
1	1	S1-1	0.05	µM	S1-23	0.0079856	µM	6368	51.6265	omicronPSV
1	1	S1-1	0.05	µM	S1-23	0.00266187	µM	9258	75.1044	omicronPSV
1	1	S1-1	0.05	µM	S1-23	0.000887289	µM	13551	109.98	omicronPSV
1	1	S1-1	0.05	µM	S1-23	0.000295763	µM	12934	104.968	omicronPSV
1	1	S1-1	0.05	µM	S1-23	9.85876e-05	µM	13882	112.669	omicronPSV
1	1	S1-1	0.05	µM	S1-23	3.28625e-05	µM	7102	57.5894	omicronPSV
1	1	S1-1	0.05	µM	S1-23	1.09542e-05	µM	13802	112.019	omicronPSV
1	1	S1-1	0.05	µM	S1-23	3.65139e-06	µM	8685	70.4495	omicronPSV
1	1	S1-1	0.05	µM	S1-23	0	µM	12886	104.578	omicronPSV
1	1	S1-1	0.0166667	µM	S1-23	0.646833	µM	0	113.319	omicronPSV
1	1	S1-1	0.0166667	µM	S1-23	0.215611	µM	13962	45.8098	omicronPSV
1	1	S1-1	0.0166667	µM	S1-23	0.0718704	µM	5652	96.6489	omicronPSV
1	1	S1-1	0.0166667	µM	S1-23	0.0239568	µM	11910	74.0971	omicronPSV
1	1	S1-1	0.0166667	µM	S1-23	0.0079856	µM	9134	52.975	omicronPSV
1	1	S1-1	0.0166667	µM	S1-23	0.00266187	µM	6534	64.8602	omicronPSV
1	1	S1-1	0.0166667	µM	S1-23	0.000887289	µM	7997	60.1728	omicronPSV
1	1	S1-1	0.0166667	µM	S1-23	0.000295763	µM	7420	46.216	omicronPSV
1	1	S1-1	0.0166667	µM	S1-23	9.85876e-05	µM	5702	103.237	omicronPSV
1	1	S1-1	0.0166667	µM	S1-23	3.28625e-05	µM	12721	64.4784	omicronPSV
1	1	S1-1	0.0166667	µM	S1-23	1.09542e-05	µM	7950	102.092	omicronPSV
1	1	S1-1	0.0166667	µM	S1-23	3.65139e-06	µM	12580	69.3284	omicronPSV
1	1	S1-1	0.0166667	µM	S1-23	0	µM	8547	96.2021	omicronPSV
1	1	S1-1	0.00555556	µM	S1-23	0.646833	µM	12320	99.9797	omicronPSV
1	1	S1-1	0.00555556	µM	S1-23	0.215611	µM	9366	75.9818	omicronPSV
1	1	S1-1	0.00555556	µM	S1-23	0.0718704	µM	8270	67.0781	omicronPSV
1	1	S1-1	0.00555556	µM	S1-23	0.0239568	µM	6912	56.0458	omicronPSV
1	1	S1-1	0.00555556	µM	S1-23	0.0079856	µM	5713	46.3053	omicronPSV
1	1	S1-1	0.00555556	µM	S1-23	0.00266187	µM	9132	74.0808	omicronPSV
1	1	S1-1	0.00555556	µM	S1-23	0.000887289	µM	9432	76.518	omicronPSV
1	1	S1-1	0.00555556	µM	S1-23	0.000295763	µM	5605	45.428	omicronPSV
1	1	S1-1	0.00555556	µM	S1-23	9.85876e-05	µM	5951	48.2388	omicronPSV
1	1	S1-1	0.00555556	µM	S1-23	3.28625e-05	µM	7491	60.7496	omicronPSV
1	1	S1-1	0.00555556	µM	S1-23	1.09542e-05	µM	5132	41.5854	omicronPSV
1	1	S1-1	0.00555556	µM	S1-23	3.65139e-06	µM	11959	97.047	omicronPSV
1	1	S1-1	0.00555556	µM	S1-23	0	µM	6985	56.6389	omicronPSV
1	1	S1-1	0.00185185	µM	S1-23	0.646833	µM	13155	106.763	omicronPSV
1	1	S1-1	0.00185185	µM	S1-23	0.215611	µM	6056	49.0918	omicronPSV
1	1	S1-1	0.00185185	µM	S1-23	0.0718704	µM	10183	82.619	omicronPSV
1	1	S1-1	0.00185185	µM	S1-23	0.0239568	µM	12430	100.873	omicronPSV
1	1	S1-1	0.00185185	µM	S1-23	0.0079856	µM	9362	75.9493	omicronPSV
1	1	S1-1	0.00185185	µM	S1-23	0.00266187	µM	10144	82.3022	omicronPSV
1	1	S1-1	0.00185185	µM	S1-23	0.000887289	µM	7897	64.0478	omicronPSV
1	1	S1-1	0.00185185	µM	S1-23	0.000295763	µM	5795	46.9715	omicronPSV
1	1	S1-1	0.00185185	µM	S1-23	9.85876e-05	µM	8213	66.615	omicronPSV
1	1	S1-1	0.00185185	µM	S1-23	3.28625e-05	µM	6016	48.7669	omicronPSV
1	1	S1-1	0.00185185	µM	S1-23	1.09542e-05	µM	9930	80.5637	omicronPSV
1	1	S1-1	0.00185185	µM	S1-23	3.65139e-06	µM	13761	111.686	omicronPSV
1	1	S1-1	0.00185185	µM	S1-23	0	µM	9522	77.2491	omicronPSV
1	1	S1-1	0.000617284	µM	S1-23	0.646833	µM	9276	75.2507	omicronPSV
1	1	S1-1	0.000617284	µM	S1-23	0.215611	µM	9396	76.2255	omicronPSV
1	1	S1-1	0.000617284	µM	S1-23	0.0718704	µM	9083	73.6827	omicronPSV
1	1	S1-1	0.000617284	µM	S1-23	0.0239568	µM	3240	26.215	omicronPSV
1	1	S1-1	0.000617284	µM	S1-23	0.0079856	µM	6128	49.6767	omicronPSV
1	1	S1-1	0.000617284	µM	S1-23	0.00266187	µM	10166	82.4809	omicronPSV
1	1	S1-1	0.000617284	µM	S1-23	0.000887289	µM	9006	73.0572	omicronPSV
1	1	S1-1	0.000617284	µM	S1-23	0.000295763	µM	5552	44.9974	omicronPSV
1	1	S1-1	0.000617284	µM	S1-23	9.85876e-05	µM	10845	87.997	omicronPSV
1	1	S1-1	0.000617284	µM	S1-23	3.28625e-05	µM	9172	74.4058	omicronPSV
1	1	S1-1	0.000617284	µM	S1-23	1.09542e-05	µM	8323	67.5086	omicronPSV
1	1	S1-1	0.000617284	µM	S1-23	3.65139e-06	µM	5318	43.0964	omicronPSV
1	1	S1-1	0.000617284	µM	S1-23	0	µM	6583	53.3731	omicronPSV
1	1	S1-1	0.000205761	µM	S1-23	0.646833	µM	6183	50.1236	omicronPSV
1	1	S1-1	0.000205761	µM	S1-23	0.215611	µM	5233	42.4059	omicronPSV
1	1	S1-1	0.000205761	µM	S1-23	0.0718704	µM	11912	96.6652	omicronPSV
1	1	S1-1	0.000205761	µM	S1-23	0.0239568	µM	6366	51.6102	omicronPSV
1	1	S1-1	0.000205761	µM	S1-23	0.0079856	µM	11359	92.1727	omicronPSV
1	1	S1-1	0.000205761	µM	S1-23	0.00266187	µM	10387	84.2763	omicronPSV
1	1	S1-1	0.000205761	µM	S1-23	0.000887289	µM	7066	57.2969	omicronPSV
1	1	S1-1	0.000205761	µM	S1-23	0.000295763	µM	7135	57.8575	omicronPSV
1	1	S1-1	0.000205761	µM	S1-23	9.85876e-05	µM	9987	81.0267	omicronPSV
1	1	S1-1	0.000205761	µM	S1-23	3.28625e-05	µM	11101	90.0767	omicronPSV
1	1	S1-1	0.000205761	µM	S1-23	1.09542e-05	µM	7956	64.5272	omicronPSV
1	1	S1-1	0.000205761	µM	S1-23	3.65139e-06	µM	12345	100.183	omicronPSV
1	1	S1-1	0.000205761	µM	S1-23	0	µM	12064	97.9	omicronPSV
1	1	S1-1	6.85871e-05	µM	S1-23	0.646833	µM	10281	83.4151	omicronPSV
1	1	S1-1	6.85871e-05	µM	S1-23	0.215611	µM	7005	56.8014	omicronPSV
1	1	S1-1	6.85871e-05	µM	S1-23	0.0718704	µM	13226	107.34	omicronPSV
1	1	S1-1	6.85871e-05	µM	S1-23	0.0239568	µM	9433	76.5261	omicronPSV
1	1	S1-1	6.85871e-05	µM	S1-23	0.0079856	µM	5268	42.6902	omicronPSV
1	1	S1-1	6.85871e-05	µM	S1-23	0.00266187	µM	6199	50.2535	omicronPSV
1	1	S1-1	6.85871e-05	µM	S1-23	0.000887289	µM	15163	123.076	omicronPSV
1	1	S1-1	6.85871e-05	µM	S1-23	0.000295763	µM	8163	66.2088	omicronPSV
1	1	S1-1	6.85871e-05	µM	S1-23	9.85876e-05	µM	6016	48.7669	omicronPSV
1	1	S1-1	6.85871e-05	µM	S1-23	3.28625e-05	µM	5464	44.2825	omicronPSV
1	1	S1-1	6.85871e-05	µM	S1-23	1.09542e-05	µM	12152	98.6149	omicronPSV
1	1	S1-1	6.85871e-05	µM	S1-23	3.65139e-06	µM	6892	55.8834	omicronPSV
1	1	S1-1	6.85871e-05	µM	S1-23	0	µM	6348	51.464	omicronPSV
1	1	S1-1	2.28624e-05	µM	S1-23	0.646833	µM	6412	51.9839	omicronPSV
1	1	S1-1	2.28624e-05	µM	S1-23	0.215611	µM	8920	72.3586	omicronPSV
1	1	S1-1	2.28624e-05	µM	S1-23	0.0718704	µM	9634	78.159	omicronPSV
1	1	S1-1	2.28624e-05	µM	S1-23	0.0239568	µM	10689	86.7297	omicronPSV
1	1	S1-1	2.28624e-05	µM	S1-23	0.0079856	µM	7112	57.6706	omicronPSV
1	1	S1-1	2.28624e-05	µM	S1-23	0.00266187	µM	7077	57.3863	omicronPSV
1	1	S1-1	2.28624e-05	µM	S1-23	0.000887289	µM	7959	64.5515	omicronPSV
1	1	S1-1	2.28624e-05	µM	S1-23	0.000295763	µM	6343	51.4234	omicronPSV
1	1	S1-1	2.28624e-05	µM	S1-23	9.85876e-05	µM	7737	62.748	omicronPSV
1	1	S1-1	2.28624e-05	µM	S1-23	3.28625e-05	µM	12124	98.3874	omicronPSV
1	1	S1-1	2.28624e-05	µM	S1-23	1.09542e-05	µM	9102	73.8371	omicronPSV
1	1	S1-1	2.28624e-05	µM	S1-23	3.65139e-06	µM	13969	113.376	omicronPSV
1	1	S1-1	2.28624e-05	µM	S1-23	0	µM	11028	89.4837	omicronPSV
1	1	S1-1	0	µM	S1-23	0.646833	µM	11338	92.0021	omicronPSV
1	1	S1-1	0	µM	S1-23	0.215611	µM	5620	45.5498	omicronPSV
1	1	S1-1	0	µM	S1-23	0.0718704	µM	10979	89.0856	omicronPSV
1	1	S1-1	0	µM	S1-23	0.0239568	µM	12778	103.7	omicronPSV
1	1	S1-1	0	µM	S1-23	0.0079856	µM	6856	55.5909	omicronPSV
1	1	S1-1	0	µM	S1-23	0.00266187	µM	11463	93.0175	omicronPSV
1	1	S1-1	0	µM	S1-23	0.000887289	µM	8985	72.8866	omicronPSV
1	1	S1-1	0	µM	S1-23	0.000295763	µM	17428	141.476	omicronPSV
1	1	S1-1	0	µM	S1-23	9.85876e-05	µM	8401	68.1423	omicronPSV
1	1	S1-1	0	µM	S1-23	3.28625e-05	µM	9137	74.1214	omicronPSV
1	1	S1-1	0	µM	S1-23	1.09542e-05	µM	8797	71.3593	omicronPSV
1	1	S1-1	0	µM	S1-23	3.65139e-06	µM	12502	101.458	omicronPSV
1	2	S1-1	4.05	µM	S1-23	0.646833	µM	11007	89.3131	omicronPSV
1	2	S1-1	4.05	µM	S1-23	0.215611	µM	8496	68.914	omicronPSV
1	2	S1-1	4.05	µM	S1-23	0.0718704	µM	11053	89.6868	omicronPSV
1	2	S1-1	4.05	µM	S1-23	0.0239568	µM	11507	93.375	omicronPSV
1	2	S1-1	4.05	µM	S1-23	0.0079856	µM	5195	42.0972	omicronPSV
1	2	S1-1	4.05	µM	S1-23	0.00266187	µM	11562	93.8218	omicronPSV
1	2	S1-1	4.05	µM	S1-23	0.000887289	µM	6351	51.4884	omicronPSV
1	2	S1-1	4.05	µM	S1-23	0.000295763	µM	7273	58.9786	omicronPSV
1	2	S1-1	4.05	µM	S1-23	9.85876e-05	µM	8269	67.0699	omicronPSV
1	2	S1-1	4.05	µM	S1-23	3.28625e-05	µM	6612	53.6087	omicronPSV
1	2	S1-1	4.05	µM	S1-23	1.09542e-05	µM	12482	101.296	omicronPSV
1	2	S1-1	4.05	µM	S1-23	3.65139e-06	µM	8127	65.9163	omicronPSV
1	2	S1-1	4.05	µM	S1-23	0	µM	8133	65.9651	omicronPSV
1	2	S1-1	1.35	µM	S1-23	0.646833	µM	6927	56.1677	omicronPSV
1	2	S1-1	1.35	µM	S1-23	0.215611	µM	9988	81.0348	omicronPSV
1	2	S1-1	1.35	µM	S1-23	0.0718704	µM	6824	55.3309	omicronPSV
1	2	S1-1	1.35	µM	S1-23	0.0239568	µM	7985	64.7627	omicronPSV
1	2	S1-1	1.35	µM	S1-23	0.0079856	µM	5565	45.103	omicronPSV
1	2	S1-1	1.35	µM	S1-23	0.00266187	µM	7784	63.1299	omicronPSV
1	2	S1-1	1.35	µM	S1-23	0.000887289	µM	13490	109.485	omicronPSV
1	2	S1-1	1.35	µM	S1-23	0.000295763	µM	8065	65.4127	omicronPSV
1	2	S1-1	1.35	µM	S1-23	9.85876e-05	µM	5410	43.8438	omicronPSV
1	2	S1-1	1.35	µM	S1-23	3.28625e-05	µM	9895	80.2793	omicronPSV
1	2	S1-1	1.35	µM	S1-23	1.09542e-05	µM	3326	26.9137	omicronPSV
1	2	S1-1	1.35	µM	S1-23	3.65139e-06	µM	11761	95.4385	omicronPSV
1	2	S1-1	1.35	µM	S1-23	0	µM	8125	65.9001	omicronPSV
1	2	S1-1	0.45	µM	S1-23	0.646833	µM	12255	99.4516	omicronPSV
1	2	S1-1	0.45	µM	S1-23	0.215611	µM	5556	45.0299	omicronPSV
1	2	S1-1	0.45	µM	S1-23	0.0718704	µM	10004	81.1648	omicronPSV
1	2	S1-1	0.45	µM	S1-23	0.0239568	µM	8848	71.7736	omicronPSV
1	2	S1-1	0.45	µM	S1-23	0.0079856	µM	11118	90.2148	omicronPSV
1	2	S1-1	0.45	µM	S1-23	0.00266187	µM	5283	42.8121	omicronPSV
1	2	S1-1	0.45	µM	S1-23	0.000887289	µM	12487	101.336	omicronPSV
1	2	S1-1	0.45	µM	S1-23	0.000295763	µM	5468	44.315	omicronPSV
1	2	S1-1	0.45	µM	S1-23	9.85876e-05	µM	7671	62.2119	omicronPSV
1	2	S1-1	0.45	µM	S1-23	3.28625e-05	µM	7418	60.1565	omicronPSV
1	2	S1-1	0.45	µM	S1-23	1.09542e-05	µM	6594	53.4625	omicronPSV
1	2	S1-1	0.45	µM	S1-23	3.65139e-06	µM	8660	70.2464	omicronPSV
1	2	S1-1	0.45	µM	S1-23	0	µM	10190	82.6759	omicronPSV
1	2	S1-1	0.15	µM	S1-23	0.646833	µM	4966	40.2368	omicronPSV
1	2	S1-1	0.15	µM	S1-23	0.215611	µM	11643	94.4798	omicronPSV
1	2	S1-1	0.15	µM	S1-23	0.0718704	µM	4661	37.759	omicronPSV
1	2	S1-1	0.15	µM	S1-23	0.0239568	µM	14688	119.217	omicronPSV
1	2	S1-1	0.15	µM	S1-23	0.0079856	µM	9776	79.3126	omicronPSV
1	2	S1-1	0.15	µM	S1-23	0.00266187	µM	6274	50.8628	omicronPSV
1	2	S1-1	0.15	µM	S1-23	0.000887289	µM	5188	42.0403	omicronPSV
1	2	S1-1	0.15	µM	S1-23	0.000295763	µM	12154	98.6311	omicronPSV
1	2	S1-1	0.15	µM	S1-23	9.85876e-05	µM	12937	104.992	omicronPSV
1	2	S1-1	0.15	µM	S1-23	3.28625e-05	µM	6060	49.1243	omicronPSV
1	2	S1-1	0.15	µM	S1-23	1.09542e-05	µM	6567	53.2431	omicronPSV
1	2	S1-1	0.15	µM	S1-23	3.65139e-06	µM	7874	63.861	omicronPSV
1	2	S1-1	0.15	µM	S1-23	0	µM	6496	52.6663	omicronPSV
1	2	S1-1	0.05	µM	S1-23	0.646833	µM	7144	57.9306	omicronPSV
1	2	S1-1	0.05	µM	S1-23	0.215611	µM	10578	85.8279	omicronPSV
1	2	S1-1	0.05	µM	S1-23	0.0718704	µM	7314	59.3116	omicronPSV
1	2	S1-1	0.05	µM	S1-23	0.0239568	µM	8375	67.9311	omicronPSV
1	2	S1-1	0.05	µM	S1-23	0.0079856	µM	6212	50.3591	omicronPSV
1	2	S1-1	0.05	µM	S1-23	0.00266187	µM	5925	48.0276	omicronPSV
1	2	S1-1	0.05	µM	S1-23	0.000887289	µM	11963	97.0795	omicronPSV
1	2	S1-1	0.05	µM	S1-23	0.000295763	µM	5651	45.8017	omicronPSV
1	2	S1-1	0.05	µM	S1-23	9.85876e-05	µM	7739	62.7643	omicronPSV
1	2	S1-1	0.05	µM	S1-23	3.28625e-05	µM	5375	43.5595	omicronPSV
1	2	S1-1	0.05	µM	S1-23	1.09542e-05	µM	9171	74.3976	omicronPSV
1	2	S1-1	0.05	µM	S1-23	3.65139e-06	µM	7287	59.0923	omicronPSV
1	2	S1-1	0.05	µM	S1-23	0	µM	7620	61.7975	omicronPSV
1	2	S1-1	0.0166667	µM	S1-23	0.646833	µM	9709	78.7683	omicronPSV
1	2	S1-1	0.0166667	µM	S1-23	0.215611	µM	7474	60.6115	omicronPSV
1	2	S1-1	0.0166667	µM	S1-23	0.0718704	µM	7097	57.5488	omicronPSV
1	2	S1-1	0.0166667	µM	S1-23	0.0239568	µM	5018	40.6593	omicronPSV
1	2	S1-1	0.0166667	µM	S1-23	0.0079856	µM	12629	102.49	omicronPSV
1	2	S1-1	0.0166667	µM	S1-23	0.00266187	µM	8624	69.9539	omicronPSV
1	2	S1-1	0.0166667	µM	S1-23	0.000887289	µM	8381	67.9798	omicronPSV
1	2	S1-1	0.0166667	µM	S1-23	0.000295763	µM	9566	77.6066	omicronPSV
1	2	S1-1	0.0166667	µM	S1-23	9.85876e-05	µM	4576	37.0685	omicronPSV
1	2	S1-1	0.0166667	µM	S1-23	3.28625e-05	µM	7276	59.0029	omicronPSV
1	2	S1-1	0.0166667	µM	S1-23	1.09542e-05	µM	9160	74.3083	omicronPSV
1	2	S1-1	0.0166667	µM	S1-23	3.65139e-06	µM	6985	56.6389	omicronPSV
1	2	S1-1	0.0166667	µM	S1-23	0	µM	6790	55.0547	omicronPSV
1	2	S1-1	0.00555556	µM	S1-23	0.646833	µM	5292	42.8852	omicronPSV
1	2	S1-1	0.00555556	µM	S1-23	0.215611	µM	8000	64.8846	omicronPSV
1	2	S1-1	0.00555556	µM	S1-23	0.0718704	µM	10520	85.3567	omicronPSV
1	2	S1-1	0.00555556	µM	S1-23	0.0239568	µM	6974	56.5495	omicronPSV
1	2	S1-1	0.00555556	µM	S1-23	0.0079856	µM	7832	63.5198	omicronPSV
1	2	S1-1	0.00555556	µM	S1-23	0.00266187	µM	6071	49.2137	omicronPSV
1	2	S1-1	0.00555556	µM	S1-23	0.000887289	µM	6428	52.1139	omicronPSV
1	2	S1-1	0.00555556	µM	S1-23	0.000295763	µM	7941	64.4053	omicronPSV
1	2	S1-1	0.00555556	µM	S1-23	9.85876e-05	µM	8726	70.7825	omicronPSV
1	2	S1-1	0.00555556	µM	S1-23	3.28625e-05	µM	9889	80.2306	omicronPSV
1	2	S1-1	0.00555556	µM	S1-23	1.09542e-05	µM	12370	100.386	omicronPSV
1	2	S1-1	0.00555556	µM	S1-23	3.65139e-06	µM	8281	67.1674	omicronPSV
1	2	S1-1	0.00555556	µM	S1-23	0	µM	6978	56.582	omicronPSV
1	2	S1-1	0.00185185	µM	S1-23	0.646833	µM	6192	50.1967	omicronPSV
1	2	S1-1	0.00185185	µM	S1-23	0.215611	µM	6477	52.512	omicronPSV
1	2	S1-1	0.00185185	µM	S1-23	0.0718704	µM	8129	65.9326	omicronPSV
1	2	S1-1	0.00185185	µM	S1-23	0.0239568	µM	8487	68.8409	omicronPSV
1	2	S1-1	0.00185185	µM	S1-23	0.0079856	µM	11157	90.5316	omicronPSV
1	2	S1-1	0.00185185	µM	S1-23	0.00266187	µM	8484	68.8166	omicronPSV
1	2	S1-1	0.00185185	µM	S1-23	0.000887289	µM	9754	79.1339	omicronPSV
1	2	S1-1	0.00185185	µM	S1-23	0.000295763	µM	9073	73.6015	omicronPSV
1	2	S1-1	0.00185185	µM	S1-23	9.85876e-05	µM	9242	74.9744	omicronPSV
1	2	S1-1	0.00185185	µM	S1-23	3.28625e-05	µM	5423	43.9494	omicronPSV
1	2	S1-1	0.00185185	µM	S1-23	1.09542e-05	µM	7562	61.3264	omicronPSV
1	2	S1-1	0.00185185	µM	S1-23	3.65139e-06	µM	11520	93.4806	omicronPSV
1	2	S1-1	0.00185185	µM	S1-23	0	µM	12870	104.448	omicronPSV
1	2	S1-1	0.000617284	µM	S1-23	0.646833	µM	8692	70.5063	omicronPSV
1	2	S1-1	0.000617284	µM	S1-23	0.215611	µM	6049	49.035	omicronPSV
1	2	S1-1	0.000617284	µM	S1-23	0.0718704	µM	11864	96.2752	omicronPSV
1	2	S1-1	0.000617284	µM	S1-23	0.0239568	µM	6764	54.8435	omicronPSV
1	2	S1-1	0.000617284	µM	S1-23	0.0079856	µM	5336	43.2426	omicronPSV
1	2	S1-1	0.000617284	µM	S1-23	0.00266187	µM	10404	84.4144	omicronPSV
1	2	S1-1	0.000617284	µM	S1-23	0.000887289	µM	6771	54.9004	omicronPSV
1	2	S1-1	0.000617284	µM	S1-23	0.000295763	µM	8161	66.1925	omicronPSV
1	2	S1-1	0.000617284	µM	S1-23	9.85876e-05	µM	6323	51.2609	omicronPSV
1	2	S1-1	0.000617284	µM	S1-23	3.28625e-05	µM	13492	109.501	omicronPSV
1	2	S1-1	0.000617284	µM	S1-23	1.09542e-05	µM	7379	59.8397	omicronPSV
1	2	S1-1	0.000617284	µM	S1-23	3.65139e-06	µM	6841	55.4691	omicronPSV
1	2	S1-1	0.000617284	µM	S1-23	0	µM	6179	50.0911	omicronPSV
1	2	S1-1	0.000205761	µM	S1-23	0.646833	µM	7181	58.2312	omicronPSV
1	2	S1-1	0.000205761	µM	S1-23	0.215611	µM	5145	41.691	omicronPSV
1	2	S1-1	0.000205761	µM	S1-23	0.0718704	µM	8311	67.4111	omicronPSV
1	2	S1-1	0.000205761	µM	S1-23	0.0239568	µM	9457	76.7211	omicronPSV
1	2	S1-1	0.000205761	µM	S1-23	0.0079856	µM	10233	83.0252	omicronPSV
1	2	S1-1	0.000205761	µM	S1-23	0.00266187	µM	15102	122.58	omicronPSV
1	2	S1-1	0.000205761	µM	S1-23	0.000887289	µM	6322	51.2528	omicronPSV
1	2	S1-1	0.000205761	µM	S1-23	0.000295763	µM	9378	76.0793	omicronPSV
1	2	S1-1	0.000205761	µM	S1-23	9.85876e-05	µM	8194	66.4606	omicronPSV
1	2	S1-1	0.000205761	µM	S1-23	3.28625e-05	µM	4346	35.2	omicronPSV
1	2	S1-1	0.000205761	µM	S1-23	1.09542e-05	µM	4923	39.8875	omicronPSV
1	2	S1-1	0.000205761	µM	S1-23	3.65139e-06	µM	7044	57.1182	omicronPSV
1	2	S1-1	0.000205761	µM	S1-23	0	µM	12024	97.575	omicronPSV
1	2	S1-1	6.85871e-05	µM	S1-23	0.646833	µM	4871	39.465	omicronPSV
1	2	S1-1	6.85871e-05	µM	S1-23	0.215611	µM	12369	100.378	omicronPSV
1	2	S1-1	6.85871e-05	µM	S1-23	0.0718704	µM	4067	32.9335	omicronPSV
1	2	S1-1	6.85871e-05	µM	S1-23	0.0239568	µM	5582	45.2411	omicronPSV
1	2	S1-1	6.85871e-05	µM	S1-23	0.0079856	µM	10610	86.0879	omicronPSV
1	2	S1-1	6.85871e-05	µM	S1-23	0.00266187	µM	12350	100.223	omicronPSV
1	2	S1-1	6.85871e-05	µM	S1-23	0.000887289	µM	9256	75.0882	omicronPSV
1	2	S1-1	6.85871e-05	µM	S1-23	0.000295763	µM	8709	70.6444	omicronPSV
1	2	S1-1	6.85871e-05	µM	S1-23	9.85876e-05	µM	5908	47.8895	omicronPSV
1	2	S1-1	6.85871e-05	µM	S1-23	3.28625e-05	µM	8790	71.3025	omicronPSV
1	2	S1-1	6.85871e-05	µM	S1-23	1.09542e-05	µM	12779	103.709	omicronPSV
1	2	S1-1	6.85871e-05	µM	S1-23	3.65139e-06	µM	7904	64.1047	omicronPSV
1	2	S1-1	6.85871e-05	µM	S1-23	0	µM	6379	51.7158	omicronPSV
1	2	S1-1	2.28624e-05	µM	S1-23	0.646833	µM	12433	100.898	omicronPSV
1	2	S1-1	2.28624e-05	µM	S1-23	0.215611	µM	8666	70.2951	omicronPSV
1	2	S1-1	2.28624e-05	µM	S1-23	0.0718704	µM	9223	74.8201	omicronPSV
1	2	S1-1	2.28624e-05	µM	S1-23	0.0239568	µM	7707	62.5043	omicronPSV
1	2	S1-1	2.28624e-05	µM	S1-23	0.0079856	µM	5121	41.496	omicronPSV
1	2	S1-1	2.28624e-05	µM	S1-23	0.00266187	µM	10871	88.2082	omicronPSV
1	2	S1-1	2.28624e-05	µM	S1-23	0.000887289	µM	13831	112.255	omicronPSV
1	2	S1-1	2.28624e-05	µM	S1-23	0.000295763	µM	9874	80.1087	omicronPSV
1	2	S1-1	2.28624e-05	µM	S1-23	9.85876e-05	µM	10533	85.4623	omicronPSV
1	2	S1-1	2.28624e-05	µM	S1-23	3.28625e-05	µM	8912	72.2936	omicronPSV
1	2	S1-1	2.28624e-05	µM	S1-23	1.09542e-05	µM	12898	104.675	omicronPSV
1	2	S1-1	2.28624e-05	µM	S1-23	3.65139e-06	µM	5219	42.2921	omicronPSV
1	2	S1-1	2.28624e-05	µM	S1-23	0	µM	10595	85.966	omicronPSV
1	2	S1-1	0	µM	S1-23	0.646833	µM	12783	103.741	omicronPSV
1	2	S1-1	0	µM	S1-23	0.215611	µM	13321	108.112	omicronPSV
1	2	S1-1	0	µM	S1-23	0.0718704	µM	9330	75.6893	omicronPSV
1	2	S1-1	0	µM	S1-23	0.0239568	µM	7184	58.2555	omicronPSV
1	2	S1-1	0	µM	S1-23	0.0079856	µM	5781	46.8578	omicronPSV
1	2	S1-1	0	µM	S1-23	0.00266187	µM	10891	88.3707	omicronPSV
1	2	S1-1	0	µM	S1-23	0.000887289	µM	5284	42.8202	omicronPSV
1	2	S1-1	0	µM	S1-23	0.000295763	µM	8792	71.3187	omicronPSV
1	2	S1-1	0	µM	S1-23	9.85876e-05	µM	11115	90.1904	omicronPSV
1	2	S1-1	0	µM	S1-23	3.28625e-05	µM	11200	90.881	omicronPSV
1	2	S1-1	0	µM	S1-23	1.09542e-05	µM	12278	99.6385	omicronPSV
1	2	S1-1	0	µM	S1-23	3.65139e-06	µM	15554	126.252	omicronPSV
1	1	S1-1	0	µM	S1-23	0	µM	16863	136.886	omicronPSV
1	2	S1-1	0	µM	S1-23	0	µM	11206	90.9297	omicronPSV
1	3	S1-1	0	µM	S1-23	0	µM	17961	145.806	omicronPSV
1	4	S1-1	0	µM	S1-23	0	µM	9554	77.5091	omicronPSV
1	5	S1-1	0	µM	S1-23	0	µM	11356	92.1483	omicronPSV
1	6	S1-1	0	µM	S1-23	0	µM	10692	86.754	omicronPSV
1	7	S1-1	0	µM	S1-23	0	µM	8954	72.6348	omicronPSV
1	8	S1-1	0	µM	S1-23	0	µM	11428	92.7332	omicronPSV
1	9	S1-1	0	µM	S1-23	0	µM	11270	91.4496	omicronPSV
1	10	S1-1	0	µM	S1-23	0	µM	11583	93.9924	omicronPSV
1	11	S1-1	0	µM	S1-23	0	µM	14108	114.505	omicronPSV
1	12	S1-1	0	µM	S1-23	0	µM	12895	104.651	omicronPSV
1	1	S1-1	100	µM	S1-23	100	µM	13	-0.000676988	omicronPSV
1	2	S1-1	100	µM	S1-23	100	µM	5	-0.0656679	omicronPSV
1	3	S1-1	100	µM	S1-23	100	µM	11	-0.0169247	omicronPSV
1	4	S1-1	100	µM	S1-23	100	µM	15	0.0155707	omicronPSV
1	5	S1-1	100	µM	S1-23	100	µM	11	-0.0169247	omicronPSV
1	6	S1-1	100	µM	S1-23	100	µM	15	0.0155707	omicronPSV
1	7	S1-1	100	µM	S1-23	100	µM	21	0.0643139	omicronPSV
1	8	S1-1	100	µM	S1-23	100	µM	13	-0.000676988	omicronPSV
1	9	S1-1	100	µM	S1-23	100	µM	11	-0.0169247	omicronPSV
1	10	S1-1	100	µM	S1-23	100	µM	13	-0.000676988	omicronPSV
1	11	S1-1	100	µM	S1-23	100	µM	19	0.0480662	omicronPSV
1	12	S1-1	100	µM	S1-23	100	µM	10	-0.0250486	omicronPSV
1	3	S1-1	4.05	µM	S1-23	0.646833	µM	9578	77.7041	omicronPSV
1	3	S1-1	1.35	µM	S1-23	0.215611	µM	11199	90.8728	omicronPSV
1	3	S1-1	0.45	µM	S1-23	0.0718704	µM	10385	84.26	omicronPSV
1	3	S1-1	0.15	µM	S1-23	0.0239568	µM	13046	105.878	omicronPSV
1	3	S1-1	0.05	µM	S1-23	0.0079856	µM	12317	99.9553	omicronPSV
1	3	S1-1	0.0166667	µM	S1-23	0.00266187	µM	11064	89.7761	omicronPSV
1	3	S1-1	0.00555556	µM	S1-23	0.000887289	µM	8552	69.369	omicronPSV
1	3	S1-1	0.00185185	µM	S1-23	0.000295763	µM	10677	86.6322	omicronPSV
1	3	S1-1	0.000617284	µM	S1-23	9.85876e-05	µM	12365	100.345	omicronPSV
1	3	S1-1	0.000205761	µM	S1-23	3.28625e-05	µM	11652	94.553	omicronPSV
1	3	S1-1	6.85871e-05	µM	S1-23	1.09542e-05	µM	12279	99.6466	omicronPSV
1	3	S1-1	2.28624e-05	µM	S1-23	3.65139e-06	µM	9585	77.7609	omicronPSV
1	4	S1-1	4.05	µM	S1-23	0.646833	µM	12009	97.4532	omicronPSV
1	4	S1-1	1.35	µM	S1-23	0.215611	µM	9406	76.3068	omicronPSV
1	4	S1-1	0.45	µM	S1-23	0.0718704	µM	8803	71.4081	omicronPSV
1	4	S1-1	0.15	µM	S1-23	0.0239568	µM	11252	91.3034	omicronPSV
1	4	S1-1	0.05	µM	S1-23	0.0079856	µM	13895	112.775	omicronPSV
1	4	S1-1	0.0166667	µM	S1-23	0.00266187	µM	9172	74.4058	omicronPSV
1	4	S1-1	0.00555556	µM	S1-23	0.000887289	µM	8321	67.4924	omicronPSV
1	4	S1-1	0.00185185	µM	S1-23	0.000295763	µM	12837	104.18	omicronPSV
1	4	S1-1	0.000617284	µM	S1-23	9.85876e-05	µM	11053	89.6868	omicronPSV
1	4	S1-1	0.000205761	µM	S1-23	3.28625e-05	µM	12280	99.6547	omicronPSV
1	4	S1-1	6.85871e-05	µM	S1-23	1.09542e-05	µM	12461	101.125	omicronPSV
1	4	S1-1	2.28624e-05	µM	S1-23	3.65139e-06	µM	10935	88.7281	omicronPSV
1	1	S1-RBD-22	1.66667	µM	S1-36	0.383333	µM	251	0.709715	WuhanPSV
1	1	S1-RBD-22	1.66667	µM	S1-36	0.127778	µM	266	0.796383	WuhanPSV
1	1	S1-RBD-22	1.66667	µM	S1-36	0.0425926	µM	278	0.865717	WuhanPSV
1	1	S1-RBD-22	1.66667	µM	S1-36	0.0141975	µM	381	1.46084	WuhanPSV
1	1	S1-RBD-22	1.66667	µM	S1-36	0.00473251	µM	301	0.998608	WuhanPSV
1	1	S1-RBD-22	1.66667	µM	S1-36	0.0015775	µM	335	1.19506	WuhanPSV
1	1	S1-RBD-22	1.66667	µM	S1-36	0.000525834	µM	288	0.923496	WuhanPSV
1	1	S1-RBD-22	1.66667	µM	S1-36	0.000175278	µM	204	0.438155	WuhanPSV
1	1	S1-RBD-22	1.66667	µM	S1-36	5.84261e-05	µM	481	2.03863	WuhanPSV
1	1	S1-RBD-22	1.66667	µM	S1-36	1.94754e-05	µM	549	2.43152	WuhanPSV
1	1	S1-RBD-22	1.66667	µM	S1-36	6.49178e-06	µM	420	1.68618	WuhanPSV
1	1	S1-RBD-22	1.66667	µM	S1-36	2.16393e-06	µM	301	0.998608	WuhanPSV
1	1	S1-RBD-22	1.66667	µM	S1-36	0	µM	247	0.686604	WuhanPSV
1	1	S1-RBD-22	0.555556	µM	S1-36	0.383333	µM	471	1.98085	WuhanPSV
1	1	S1-RBD-22	0.555556	µM	S1-36	0.127778	µM	645	2.9862	WuhanPSV
1	1	S1-RBD-22	0.555556	µM	S1-36	0.0425926	µM	355	1.31061	WuhanPSV
1	1	S1-RBD-22	0.555556	µM	S1-36	0.0141975	µM	296	0.969719	WuhanPSV
1	1	S1-RBD-22	0.555556	µM	S1-36	0.00473251	µM	806	3.91643	WuhanPSV
1	1	S1-RBD-22	0.555556	µM	S1-36	0.0015775	µM	444	1.82484	WuhanPSV
1	1	S1-RBD-22	0.555556	µM	S1-36	0.000525834	µM	262	0.773272	WuhanPSV
1	1	S1-RBD-22	0.555556	µM	S1-36	0.000175278	µM	210	0.472822	WuhanPSV
1	1	S1-RBD-22	0.555556	µM	S1-36	5.84261e-05	µM	514	2.22929	WuhanPSV
1	1	S1-RBD-22	0.555556	µM	S1-36	1.94754e-05	µM	261	0.767494	WuhanPSV
1	1	S1-RBD-22	0.555556	µM	S1-36	6.49178e-06	µM	286	0.91194	WuhanPSV
1	1	S1-RBD-22	0.555556	µM	S1-36	2.16393e-06	µM	232	0.599935	WuhanPSV
1	1	S1-RBD-22	0.555556	µM	S1-36	0	µM	1116	5.70757	WuhanPSV
1	1	S1-RBD-22	0.185185	µM	S1-36	0.383333	µM	358	1.32795	WuhanPSV
1	1	S1-RBD-22	0.185185	µM	S1-36	0.127778	µM	410	1.6284	WuhanPSV
1	1	S1-RBD-22	0.185185	µM	S1-36	0.0425926	µM	319	1.10261	WuhanPSV
1	1	S1-RBD-22	0.185185	µM	S1-36	0.0141975	µM	303	1.01016	WuhanPSV
1	1	S1-RBD-22	0.185185	µM	S1-36	0.00473251	µM	343	1.24128	WuhanPSV
1	1	S1-RBD-22	0.185185	µM	S1-36	0.0015775	µM	1084	5.52268	WuhanPSV
1	1	S1-RBD-22	0.185185	µM	S1-36	0.000525834	µM	270	0.819495	WuhanPSV
1	1	S1-RBD-22	0.185185	µM	S1-36	0.000175278	µM	373	1.41462	WuhanPSV
1	1	S1-RBD-22	0.185185	µM	S1-36	5.84261e-05	µM	290	0.935052	WuhanPSV
1	1	S1-RBD-22	0.185185	µM	S1-36	1.94754e-05	µM	617	2.82442	WuhanPSV
1	1	S1-RBD-22	0.185185	µM	S1-36	6.49178e-06	µM	277	0.85994	WuhanPSV
1	1	S1-RBD-22	0.185185	µM	S1-36	2.16393e-06	µM	244	0.66927	WuhanPSV
1	1	S1-RBD-22	0.185185	µM	S1-36	0	µM	6627	37.5494	WuhanPSV
1	1	S1-RBD-22	0.0617284	µM	S1-36	0.383333	µM	314	1.07372	WuhanPSV
1	1	S1-RBD-22	0.0617284	µM	S1-36	0.127778	µM	301	0.998608	WuhanPSV
1	1	S1-RBD-22	0.0617284	µM	S1-36	0.0425926	µM	919	4.56933	WuhanPSV
1	1	S1-RBD-22	0.0617284	µM	S1-36	0.0141975	µM	350	1.28172	WuhanPSV
1	1	S1-RBD-22	0.0617284	µM	S1-36	0.00473251	µM	889	4.396	WuhanPSV
1	1	S1-RBD-22	0.0617284	µM	S1-36	0.0015775	µM	462	1.92885	WuhanPSV
1	1	S1-RBD-22	0.0617284	µM	S1-36	0.000525834	µM	402	1.58217	WuhanPSV
1	1	S1-RBD-22	0.0617284	µM	S1-36	0.000175278	µM	2373	12.9704	WuhanPSV
1	1	S1-RBD-22	0.0617284	µM	S1-36	5.84261e-05	µM	2069	11.2139	WuhanPSV
1	1	S1-RBD-22	0.0617284	µM	S1-36	1.94754e-05	µM	2051	11.1099	WuhanPSV
1	1	S1-RBD-22	0.0617284	µM	S1-36	6.49178e-06	µM	3559	19.8229	WuhanPSV
1	1	S1-RBD-22	0.0617284	µM	S1-36	2.16393e-06	µM	2106	11.4277	WuhanPSV
1	1	S1-RBD-22	0.0617284	µM	S1-36	0	µM	6171	34.9147	WuhanPSV
1	1	S1-RBD-22	0.0205761	µM	S1-36	0.383333	µM	162	0.195485	WuhanPSV
1	1	S1-RBD-22	0.0205761	µM	S1-36	0.127778	µM	356	1.31639	WuhanPSV
1	1	S1-RBD-22	0.0205761	µM	S1-36	0.0425926	µM	328	1.15461	WuhanPSV
1	1	S1-RBD-22	0.0205761	µM	S1-36	0.0141975	µM	458	1.90573	WuhanPSV
1	1	S1-RBD-22	0.0205761	µM	S1-36	0.00473251	µM	3383	18.806	WuhanPSV
1	1	S1-RBD-22	0.0205761	µM	S1-36	0.0015775	µM	6647	37.665	WuhanPSV
1	1	S1-RBD-22	0.0205761	µM	S1-36	0.000525834	µM	8043	45.7309	WuhanPSV
1	1	S1-RBD-22	0.0205761	µM	S1-36	0.000175278	µM	6696	37.9481	WuhanPSV
1	1	S1-RBD-22	0.0205761	µM	S1-36	5.84261e-05	µM	9910	56.5182	WuhanPSV
1	1	S1-RBD-22	0.0205761	µM	S1-36	1.94754e-05	µM	8477	48.2385	WuhanPSV
1	1	S1-RBD-22	0.0205761	µM	S1-36	6.49178e-06	µM	8291	47.1638	WuhanPSV
1	1	S1-RBD-22	0.0205761	µM	S1-36	2.16393e-06	µM	5166	29.1079	WuhanPSV
1	1	S1-RBD-22	0.0205761	µM	S1-36	0	µM	19948	114.516	WuhanPSV
1	1	S1-RBD-22	0.00685871	µM	S1-36	0.383333	µM	340	1.22395	WuhanPSV
1	1	S1-RBD-22	0.00685871	µM	S1-36	0.127778	µM	269	0.813717	WuhanPSV
1	1	S1-RBD-22	0.00685871	µM	S1-36	0.0425926	µM	808	3.92799	WuhanPSV
1	1	S1-RBD-22	0.00685871	µM	S1-36	0.0141975	µM	5442	30.7026	WuhanPSV
1	1	S1-RBD-22	0.00685871	µM	S1-36	0.00473251	µM	9264	52.7857	WuhanPSV
1	1	S1-RBD-22	0.00685871	µM	S1-36	0.0015775	µM	6594	37.3587	WuhanPSV
1	1	S1-RBD-22	0.00685871	µM	S1-36	0.000525834	µM	10765	61.4582	WuhanPSV
1	1	S1-RBD-22	0.00685871	µM	S1-36	0.000175278	µM	8682	49.4229	WuhanPSV
1	1	S1-RBD-22	0.00685871	µM	S1-36	5.84261e-05	µM	9012	51.3296	WuhanPSV
1	1	S1-RBD-22	0.00685871	µM	S1-36	1.94754e-05	µM	10085	57.5293	WuhanPSV
1	1	S1-RBD-22	0.00685871	µM	S1-36	6.49178e-06	µM	8952	50.983	WuhanPSV
1	1	S1-RBD-22	0.00685871	µM	S1-36	2.16393e-06	µM	8540	48.6025	WuhanPSV
1	1	S1-RBD-22	0.00685871	µM	S1-36	0	µM	12952	74.0944	WuhanPSV
1	1	S1-RBD-22	0.00228624	µM	S1-36	0.383333	µM	337	1.20661	WuhanPSV
1	1	S1-RBD-22	0.00228624	µM	S1-36	0.127778	µM	600	2.72619	WuhanPSV
1	1	S1-RBD-22	0.00228624	µM	S1-36	0.0425926	µM	3442	19.1469	WuhanPSV
1	1	S1-RBD-22	0.00228624	µM	S1-36	0.0141975	µM	5653	31.9218	WuhanPSV
1	1	S1-RBD-22	0.00228624	µM	S1-36	0.00473251	µM	7098	40.2708	WuhanPSV
1	1	S1-RBD-22	0.00228624	µM	S1-36	0.0015775	µM	9890	56.4026	WuhanPSV
1	1	S1-RBD-22	0.00228624	µM	S1-36	0.000525834	µM	8392	47.7474	WuhanPSV
1	1	S1-RBD-22	0.00228624	µM	S1-36	0.000175278	µM	12466	71.2864	WuhanPSV
1	1	S1-RBD-22	0.00228624	µM	S1-36	5.84261e-05	µM	12594	72.026	WuhanPSV
1	1	S1-RBD-22	0.00228624	µM	S1-36	1.94754e-05	µM	6344	35.9143	WuhanPSV
1	1	S1-RBD-22	0.00228624	µM	S1-36	6.49178e-06	µM	8862	50.463	WuhanPSV
1	1	S1-RBD-22	0.00228624	µM	S1-36	2.16393e-06	µM	7090	40.2246	WuhanPSV
1	1	S1-RBD-22	0.00228624	µM	S1-36	0	µM	13451	76.9776	WuhanPSV
1	1	S1-RBD-22	0.000762079	µM	S1-36	0.383333	µM	137	0.0510378	WuhanPSV
1	1	S1-RBD-22	0.000762079	µM	S1-36	0.127778	µM	777	3.74887	WuhanPSV
1	1	S1-RBD-22	0.000762079	µM	S1-36	0.0425926	µM	4046	22.6367	WuhanPSV
1	1	S1-RBD-22	0.000762079	µM	S1-36	0.0141975	µM	11069	63.2147	WuhanPSV
1	1	S1-RBD-22	0.000762079	µM	S1-36	0.00473251	µM	13360	76.4518	WuhanPSV
1	1	S1-RBD-22	0.000762079	µM	S1-36	0.0015775	µM	9330	53.167	WuhanPSV
1	1	S1-RBD-22	0.000762079	µM	S1-36	0.000525834	µM	19044	109.293	WuhanPSV
1	1	S1-RBD-22	0.000762079	µM	S1-36	0.000175278	µM	18054	103.573	WuhanPSV
1	1	S1-RBD-22	0.000762079	µM	S1-36	5.84261e-05	µM	7534	42.7899	WuhanPSV
1	1	S1-RBD-22	0.000762079	µM	S1-36	1.94754e-05	µM	13369	76.5038	WuhanPSV
1	1	S1-RBD-22	0.000762079	µM	S1-36	6.49178e-06	µM	15843	90.7983	WuhanPSV
1	1	S1-RBD-22	0.000762079	µM	S1-36	2.16393e-06	µM	11943	68.2646	WuhanPSV
1	1	S1-RBD-22	0.000762079	µM	S1-36	0	µM	19102	109.628	WuhanPSV
1	1	S1-RBD-22	0.000254026	µM	S1-36	0.383333	µM	946	4.72533	WuhanPSV
1	1	S1-RBD-22	0.000254026	µM	S1-36	0.127778	µM	860	4.22844	WuhanPSV
1	1	S1-RBD-22	0.000254026	µM	S1-36	0.0425926	µM	1822	9.78675	WuhanPSV
1	1	S1-RBD-22	0.000254026	µM	S1-36	0.0141975	µM	6862	38.9072	WuhanPSV
1	1	S1-RBD-22	0.000254026	µM	S1-36	0.00473251	µM	10041	57.2751	WuhanPSV
1	1	S1-RBD-22	0.000254026	µM	S1-36	0.0015775	µM	10321	58.8929	WuhanPSV
1	1	S1-RBD-22	0.000254026	µM	S1-36	0.000525834	µM	17118	98.165	WuhanPSV
1	1	S1-RBD-22	0.000254026	µM	S1-36	0.000175278	µM	15028	86.0893	WuhanPSV
1	1	S1-RBD-22	0.000254026	µM	S1-36	5.84261e-05	µM	10349	59.0546	WuhanPSV
1	1	S1-RBD-22	0.000254026	µM	S1-36	1.94754e-05	µM	16135	92.4854	WuhanPSV
1	1	S1-RBD-22	0.000254026	µM	S1-36	6.49178e-06	µM	12426	71.0553	WuhanPSV
1	1	S1-RBD-22	0.000254026	µM	S1-36	2.16393e-06	µM	14444	82.715	WuhanPSV
1	1	S1-RBD-22	0.000254026	µM	S1-36	0	µM	9669	55.1257	WuhanPSV
1	1	S1-RBD-22	8.46754e-05	µM	S1-36	0.383333	µM	165	0.212818	WuhanPSV
1	1	S1-RBD-22	8.46754e-05	µM	S1-36	0.127778	µM	835	4.08399	WuhanPSV
1	1	S1-RBD-22	8.46754e-05	µM	S1-36	0.0425926	µM	4135	23.151	WuhanPSV
1	1	S1-RBD-22	8.46754e-05	µM	S1-36	0.0141975	µM	5751	32.488	WuhanPSV
1	1	S1-RBD-22	8.46754e-05	µM	S1-36	0.00473251	µM	5581	31.5058	WuhanPSV
1	1	S1-RBD-22	8.46754e-05	µM	S1-36	0.0015775	µM	16405	94.0454	WuhanPSV
1	1	S1-RBD-22	8.46754e-05	µM	S1-36	0.000525834	µM	18049	103.544	WuhanPSV
1	1	S1-RBD-22	8.46754e-05	µM	S1-36	0.000175278	µM	14640	83.8475	WuhanPSV
1	1	S1-RBD-22	8.46754e-05	µM	S1-36	5.84261e-05	µM	11256	64.2952	WuhanPSV
1	1	S1-RBD-22	8.46754e-05	µM	S1-36	1.94754e-05	µM	13928	79.7336	WuhanPSV
1	1	S1-RBD-22	8.46754e-05	µM	S1-36	6.49178e-06	µM	10735	61.2849	WuhanPSV
1	1	S1-RBD-22	8.46754e-05	µM	S1-36	2.16393e-06	µM	12494	71.4482	WuhanPSV
1	1	S1-RBD-22	8.46754e-05	µM	S1-36	0	µM	15427	88.3947	WuhanPSV
1	1	S1-RBD-22	2.82251e-05	µM	S1-36	0.383333	µM	250	0.703937	WuhanPSV
1	1	S1-RBD-22	2.82251e-05	µM	S1-36	0.127778	µM	234	0.611491	WuhanPSV
1	1	S1-RBD-22	2.82251e-05	µM	S1-36	0.0425926	µM	3458	19.2393	WuhanPSV
1	1	S1-RBD-22	2.82251e-05	µM	S1-36	0.0141975	µM	4768	26.8084	WuhanPSV
1	1	S1-RBD-22	2.82251e-05	µM	S1-36	0.00473251	µM	12313	70.4024	WuhanPSV
1	1	S1-RBD-22	2.82251e-05	µM	S1-36	0.0015775	µM	5903	33.3662	WuhanPSV
1	1	S1-RBD-22	2.82251e-05	µM	S1-36	0.000525834	µM	12257	70.0788	WuhanPSV
1	1	S1-RBD-22	2.82251e-05	µM	S1-36	0.000175278	µM	14822	84.8991	WuhanPSV
1	1	S1-RBD-22	2.82251e-05	µM	S1-36	5.84261e-05	µM	10710	61.1405	WuhanPSV
1	1	S1-RBD-22	2.82251e-05	µM	S1-36	1.94754e-05	µM	21156	121.496	WuhanPSV
1	1	S1-RBD-22	2.82251e-05	µM	S1-36	6.49178e-06	µM	16178	92.7338	WuhanPSV
1	1	S1-RBD-22	2.82251e-05	µM	S1-36	2.16393e-06	µM	9424	53.7101	WuhanPSV
1	1	S1-RBD-22	2.82251e-05	µM	S1-36	0	µM	14473	82.8826	WuhanPSV
1	1	S1-RBD-22	9.40838e-06	µM	S1-36	0.383333	µM	195	0.386154	WuhanPSV
1	1	S1-RBD-22	9.40838e-06	µM	S1-36	0.127778	µM	160	0.183929	WuhanPSV
1	1	S1-RBD-22	9.40838e-06	µM	S1-36	0.0425926	µM	3326	18.4767	WuhanPSV
1	1	S1-RBD-22	9.40838e-06	µM	S1-36	0.0141975	µM	5508	31.084	WuhanPSV
1	1	S1-RBD-22	9.40838e-06	µM	S1-36	0.00473251	µM	13420	76.7985	WuhanPSV
1	1	S1-RBD-22	9.40838e-06	µM	S1-36	0.0015775	µM	11013	62.8911	WuhanPSV
1	1	S1-RBD-22	9.40838e-06	µM	S1-36	0.000525834	µM	23153	133.034	WuhanPSV
1	1	S1-RBD-22	9.40838e-06	µM	S1-36	0.000175278	µM	13836	79.2021	WuhanPSV
1	1	S1-RBD-22	9.40838e-06	µM	S1-36	5.84261e-05	µM	17659	101.291	WuhanPSV
1	1	S1-RBD-22	9.40838e-06	µM	S1-36	1.94754e-05	µM	13470	77.0874	WuhanPSV
1	1	S1-RBD-22	9.40838e-06	µM	S1-36	6.49178e-06	µM	10445	59.6093	WuhanPSV
1	1	S1-RBD-22	9.40838e-06	µM	S1-36	2.16393e-06	µM	11496	65.6819	WuhanPSV
1	1	S1-RBD-22	9.40838e-06	µM	S1-36	0	µM	13966	79.9532	WuhanPSV
1	1	S1-RBD-22	0	µM	S1-36	0.383333	µM	211	0.4786	WuhanPSV
1	1	S1-RBD-22	0	µM	S1-36	0.127778	µM	359	1.33372	WuhanPSV
1	1	S1-RBD-22	0	µM	S1-36	0.0425926	µM	3523	19.6149	WuhanPSV
1	1	S1-RBD-22	0	µM	S1-36	0.0141975	µM	8461	48.146	WuhanPSV
1	1	S1-RBD-22	0	µM	S1-36	0.00473251	µM	14358	82.2181	WuhanPSV
1	1	S1-RBD-22	0	µM	S1-36	0.0015775	µM	10845	61.9205	WuhanPSV
1	1	S1-RBD-22	0	µM	S1-36	0.000525834	µM	19491	111.876	WuhanPSV
1	1	S1-RBD-22	0	µM	S1-36	0.000175278	µM	10678	60.9556	WuhanPSV
1	1	S1-RBD-22	0	µM	S1-36	5.84261e-05	µM	17843	102.354	WuhanPSV
1	1	S1-RBD-22	0	µM	S1-36	1.94754e-05	µM	12176	69.6108	WuhanPSV
1	1	S1-RBD-22	0	µM	S1-36	6.49178e-06	µM	11228	64.1334	WuhanPSV
1	1	S1-RBD-22	0	µM	S1-36	2.16393e-06	µM	15964	91.4974	WuhanPSV
1	2	S1-RBD-22	1.66667	µM	S1-36	0.383333	µM	308	1.03905	WuhanPSV
1	2	S1-RBD-22	1.66667	µM	S1-36	0.127778	µM	235	0.617269	WuhanPSV
1	2	S1-RBD-22	1.66667	µM	S1-36	0.0425926	µM	336	1.20083	WuhanPSV
1	2	S1-RBD-22	1.66667	µM	S1-36	0.0141975	µM	294	0.958163	WuhanPSV
1	2	S1-RBD-22	1.66667	µM	S1-36	0.00473251	µM	292	0.946608	WuhanPSV
1	2	S1-RBD-22	1.66667	µM	S1-36	0.0015775	µM	362	1.35106	WuhanPSV
1	2	S1-RBD-22	1.66667	µM	S1-36	0.000525834	µM	239	0.640381	WuhanPSV
1	2	S1-RBD-22	1.66667	µM	S1-36	0.000175278	µM	224	0.553713	WuhanPSV
1	2	S1-RBD-22	1.66667	µM	S1-36	5.84261e-05	µM	210	0.472822	WuhanPSV
1	2	S1-RBD-22	1.66667	µM	S1-36	1.94754e-05	µM	300	0.992831	WuhanPSV
1	2	S1-RBD-22	1.66667	µM	S1-36	6.49178e-06	µM	239	0.640381	WuhanPSV
1	2	S1-RBD-22	1.66667	µM	S1-36	2.16393e-06	µM	755	3.62176	WuhanPSV
1	2	S1-RBD-22	1.66667	µM	S1-36	0	µM	486	2.06751	WuhanPSV
1	2	S1-RBD-22	0.555556	µM	S1-36	0.383333	µM	322	1.11994	WuhanPSV
1	2	S1-RBD-22	0.555556	µM	S1-36	0.127778	µM	265	0.790605	WuhanPSV
1	2	S1-RBD-22	0.555556	µM	S1-36	0.0425926	µM	320	1.10839	WuhanPSV
1	2	S1-RBD-22	0.555556	µM	S1-36	0.0141975	µM	286	0.91194	WuhanPSV
1	2	S1-RBD-22	0.555556	µM	S1-36	0.00473251	µM	232	0.599935	WuhanPSV
1	2	S1-RBD-22	0.555556	µM	S1-36	0.0015775	µM	327	1.14883	WuhanPSV
1	2	S1-RBD-22	0.555556	µM	S1-36	0.000525834	µM	325	1.13728	WuhanPSV
1	2	S1-RBD-22	0.555556	µM	S1-36	0.000175278	µM	239	0.640381	WuhanPSV
1	2	S1-RBD-22	0.555556	µM	S1-36	5.84261e-05	µM	462	1.92885	WuhanPSV
1	2	S1-RBD-22	0.555556	µM	S1-36	1.94754e-05	µM	244	0.66927	WuhanPSV
1	2	S1-RBD-22	0.555556	µM	S1-36	6.49178e-06	µM	948	4.73689	WuhanPSV
1	2	S1-RBD-22	0.555556	µM	S1-36	2.16393e-06	µM	678	3.17687	WuhanPSV
1	2	S1-RBD-22	0.555556	µM	S1-36	0	µM	218	0.519045	WuhanPSV
1	2	S1-RBD-22	0.185185	µM	S1-36	0.383333	µM	290	0.935052	WuhanPSV
1	2	S1-RBD-22	0.185185	µM	S1-36	0.127778	µM	267	0.802161	WuhanPSV
1	2	S1-RBD-22	0.185185	µM	S1-36	0.0425926	µM	323	1.12572	WuhanPSV
1	2	S1-RBD-22	0.185185	µM	S1-36	0.0141975	µM	258	0.75016	WuhanPSV
1	2	S1-RBD-22	0.185185	µM	S1-36	0.00473251	µM	292	0.946608	WuhanPSV
1	2	S1-RBD-22	0.185185	µM	S1-36	0.0015775	µM	276	0.854162	WuhanPSV
1	2	S1-RBD-22	0.185185	µM	S1-36	0.000525834	µM	236	0.623047	WuhanPSV
1	2	S1-RBD-22	0.185185	µM	S1-36	0.000175278	µM	229	0.582602	WuhanPSV
1	2	S1-RBD-22	0.185185	µM	S1-36	5.84261e-05	µM	265	0.790605	WuhanPSV
1	2	S1-RBD-22	0.185185	µM	S1-36	1.94754e-05	µM	268	0.807939	WuhanPSV
1	2	S1-RBD-22	0.185185	µM	S1-36	6.49178e-06	µM	1157	5.94447	WuhanPSV
1	2	S1-RBD-22	0.185185	µM	S1-36	2.16393e-06	µM	394	1.53595	WuhanPSV
1	2	S1-RBD-22	0.185185	µM	S1-36	0	µM	5085	28.6399	WuhanPSV
1	2	S1-RBD-22	0.0617284	µM	S1-36	0.383333	µM	303	1.01016	WuhanPSV
1	2	S1-RBD-22	0.0617284	µM	S1-36	0.127778	µM	383	1.47239	WuhanPSV
1	2	S1-RBD-22	0.0617284	µM	S1-36	0.0425926	µM	889	4.396	WuhanPSV
1	2	S1-RBD-22	0.0617284	µM	S1-36	0.0141975	µM	318	1.09683	WuhanPSV
1	2	S1-RBD-22	0.0617284	µM	S1-36	0.00473251	µM	893	4.41911	WuhanPSV
1	2	S1-RBD-22	0.0617284	µM	S1-36	0.0015775	µM	266	0.796383	WuhanPSV
1	2	S1-RBD-22	0.0617284	µM	S1-36	0.000525834	µM	1183	6.09469	WuhanPSV
1	2	S1-RBD-22	0.0617284	µM	S1-36	0.000175278	µM	2516	13.7966	WuhanPSV
1	2	S1-RBD-22	0.0617284	µM	S1-36	5.84261e-05	µM	6340	35.8912	WuhanPSV
1	2	S1-RBD-22	0.0617284	µM	S1-36	1.94754e-05	µM	2346	12.8144	WuhanPSV
1	2	S1-RBD-22	0.0617284	µM	S1-36	6.49178e-06	µM	3521	19.6033	WuhanPSV
1	2	S1-RBD-22	0.0617284	µM	S1-36	2.16393e-06	µM	2157	11.7223	WuhanPSV
1	2	S1-RBD-22	0.0617284	µM	S1-36	0	µM	6016	34.0191	WuhanPSV
1	2	S1-RBD-22	0.0205761	µM	S1-36	0.383333	µM	327	1.14883	WuhanPSV
1	2	S1-RBD-22	0.0205761	µM	S1-36	0.127778	µM	166	0.218596	WuhanPSV
1	2	S1-RBD-22	0.0205761	µM	S1-36	0.0425926	µM	365	1.36839	WuhanPSV
1	2	S1-RBD-22	0.0205761	µM	S1-36	0.0141975	µM	330	1.16617	WuhanPSV
1	2	S1-RBD-22	0.0205761	µM	S1-36	0.00473251	µM	3617	20.158	WuhanPSV
1	2	S1-RBD-22	0.0205761	µM	S1-36	0.0015775	µM	6436	36.4458	WuhanPSV
1	2	S1-RBD-22	0.0205761	µM	S1-36	0.000525834	µM	7878	44.7775	WuhanPSV
1	2	S1-RBD-22	0.0205761	µM	S1-36	0.000175278	µM	6680	37.8556	WuhanPSV
1	2	S1-RBD-22	0.0205761	µM	S1-36	5.84261e-05	µM	4175	23.3821	WuhanPSV
1	2	S1-RBD-22	0.0205761	µM	S1-36	1.94754e-05	µM	7413	42.0908	WuhanPSV
1	2	S1-RBD-22	0.0205761	µM	S1-36	6.49178e-06	µM	3058	16.9282	WuhanPSV
1	2	S1-RBD-22	0.0205761	µM	S1-36	2.16393e-06	µM	11141	63.6307	WuhanPSV
1	2	S1-RBD-22	0.0205761	µM	S1-36	0	µM	11664	66.6525	WuhanPSV
1	2	S1-RBD-22	0.00685871	µM	S1-36	0.383333	µM	314	1.07372	WuhanPSV
1	2	S1-RBD-22	0.00685871	µM	S1-36	0.127778	µM	352	1.29328	WuhanPSV
1	2	S1-RBD-22	0.00685871	µM	S1-36	0.0425926	µM	530	2.32174	WuhanPSV
1	2	S1-RBD-22	0.00685871	µM	S1-36	0.0141975	µM	3344	18.5807	WuhanPSV
1	2	S1-RBD-22	0.00685871	µM	S1-36	0.00473251	µM	6146	34.7703	WuhanPSV
1	2	S1-RBD-22	0.00685871	µM	S1-36	0.0015775	µM	7464	42.3855	WuhanPSV
1	2	S1-RBD-22	0.00685871	µM	S1-36	0.000525834	µM	7896	44.8815	WuhanPSV
1	2	S1-RBD-22	0.00685871	µM	S1-36	0.000175278	µM	8732	49.7118	WuhanPSV
1	2	S1-RBD-22	0.00685871	µM	S1-36	5.84261e-05	µM	7695	43.7202	WuhanPSV
1	2	S1-RBD-22	0.00685871	µM	S1-36	1.94754e-05	µM	4327	24.2603	WuhanPSV
1	2	S1-RBD-22	0.00685871	µM	S1-36	6.49178e-06	µM	4402	24.6937	WuhanPSV
1	2	S1-RBD-22	0.00685871	µM	S1-36	2.16393e-06	µM	17878	102.556	WuhanPSV
1	2	S1-RBD-22	0.00685871	µM	S1-36	0	µM	17323	99.3495	WuhanPSV
1	2	S1-RBD-22	0.00228624	µM	S1-36	0.383333	µM	233	0.605713	WuhanPSV
1	2	S1-RBD-22	0.00228624	µM	S1-36	0.127778	µM	401	1.5764	WuhanPSV
1	2	S1-RBD-22	0.00228624	µM	S1-36	0.0425926	µM	2183	11.8726	WuhanPSV
1	2	S1-RBD-22	0.00228624	µM	S1-36	0.0141975	µM	2487	13.629	WuhanPSV
1	2	S1-RBD-22	0.00228624	µM	S1-36	0.00473251	µM	7278	41.3108	WuhanPSV
1	2	S1-RBD-22	0.00228624	µM	S1-36	0.0015775	µM	6924	39.2654	WuhanPSV
1	2	S1-RBD-22	0.00228624	µM	S1-36	0.000525834	µM	11631	66.4619	WuhanPSV
1	2	S1-RBD-22	0.00228624	µM	S1-36	0.000175278	µM	6754	38.2832	WuhanPSV
1	2	S1-RBD-22	0.00228624	µM	S1-36	5.84261e-05	µM	10000	57.0382	WuhanPSV
1	2	S1-RBD-22	0.00228624	µM	S1-36	1.94754e-05	µM	5113	28.8017	WuhanPSV
1	2	S1-RBD-22	0.00228624	µM	S1-36	6.49178e-06	µM	9257	52.7452	WuhanPSV
1	2	S1-RBD-22	0.00228624	µM	S1-36	2.16393e-06	µM	9914	56.5413	WuhanPSV
1	2	S1-RBD-22	0.00228624	µM	S1-36	0	µM	16175	92.7165	WuhanPSV
1	2	S1-RBD-22	0.000762079	µM	S1-36	0.383333	µM	319	1.10261	WuhanPSV
1	2	S1-RBD-22	0.000762079	µM	S1-36	0.127778	µM	342	1.2355	WuhanPSV
1	2	S1-RBD-22	0.000762079	µM	S1-36	0.0425926	µM	3199	17.7429	WuhanPSV
1	2	S1-RBD-22	0.000762079	µM	S1-36	0.0141975	µM	9547	54.4208	WuhanPSV
1	2	S1-RBD-22	0.000762079	µM	S1-36	0.00473251	µM	8709	49.5789	WuhanPSV
1	2	S1-RBD-22	0.000762079	µM	S1-36	0.0015775	µM	12400	70.9051	WuhanPSV
1	2	S1-RBD-22	0.000762079	µM	S1-36	0.000525834	µM	15989	91.6418	WuhanPSV
1	2	S1-RBD-22	0.000762079	µM	S1-36	0.000175278	µM	12564	71.8526	WuhanPSV
1	2	S1-RBD-22	0.000762079	µM	S1-36	5.84261e-05	µM	11005	62.8449	WuhanPSV
1	2	S1-RBD-22	0.000762079	µM	S1-36	1.94754e-05	µM	14118	80.8314	WuhanPSV
1	2	S1-RBD-22	0.000762079	µM	S1-36	6.49178e-06	µM	17448	100.072	WuhanPSV
1	2	S1-RBD-22	0.000762079	µM	S1-36	2.16393e-06	µM	19486	111.847	WuhanPSV
1	2	S1-RBD-22	0.000762079	µM	S1-36	0	µM	8174	46.4878	WuhanPSV
1	2	S1-RBD-22	0.000254026	µM	S1-36	0.383333	µM	145	0.0972608	WuhanPSV
1	2	S1-RBD-22	0.000254026	µM	S1-36	0.127778	µM	121	-0.0414081	WuhanPSV
1	2	S1-RBD-22	0.000254026	µM	S1-36	0.0425926	µM	2864	15.8073	WuhanPSV
1	2	S1-RBD-22	0.000254026	µM	S1-36	0.0141975	µM	6013	34.0018	WuhanPSV
1	2	S1-RBD-22	0.000254026	µM	S1-36	0.00473251	µM	9755	55.6226	WuhanPSV
1	2	S1-RBD-22	0.000254026	µM	S1-36	0.0015775	µM	13045	74.6318	WuhanPSV
1	2	S1-RBD-22	0.000254026	µM	S1-36	0.000525834	µM	16492	94.5481	WuhanPSV
1	2	S1-RBD-22	0.000254026	µM	S1-36	0.000175278	µM	9692	55.2586	WuhanPSV
1	2	S1-RBD-22	0.000254026	µM	S1-36	5.84261e-05	µM	15488	88.7471	WuhanPSV
1	2	S1-RBD-22	0.000254026	µM	S1-36	1.94754e-05	µM	10679	60.9613	WuhanPSV
1	2	S1-RBD-22	0.000254026	µM	S1-36	6.49178e-06	µM	11309	64.6014	WuhanPSV
1	2	S1-RBD-22	0.000254026	µM	S1-36	2.16393e-06	µM	15070	86.332	WuhanPSV
1	2	S1-RBD-22	0.000254026	µM	S1-36	0	µM	10686	61.0018	WuhanPSV
1	2	S1-RBD-22	8.46754e-05	µM	S1-36	0.383333	µM	213	0.490156	WuhanPSV
1	2	S1-RBD-22	8.46754e-05	µM	S1-36	0.127778	µM	194	0.380376	WuhanPSV
1	2	S1-RBD-22	8.46754e-05	µM	S1-36	0.0425926	µM	3525	19.6265	WuhanPSV
1	2	S1-RBD-22	8.46754e-05	µM	S1-36	0.0141975	µM	4055	22.6887	WuhanPSV
1	2	S1-RBD-22	8.46754e-05	µM	S1-36	0.00473251	µM	13021	74.4931	WuhanPSV
1	2	S1-RBD-22	8.46754e-05	µM	S1-36	0.0015775	µM	13062	74.73	WuhanPSV
1	2	S1-RBD-22	8.46754e-05	µM	S1-36	0.000525834	µM	15868	90.9427	WuhanPSV
1	2	S1-RBD-22	8.46754e-05	µM	S1-36	0.000175278	µM	12641	72.2975	WuhanPSV
1	2	S1-RBD-22	8.46754e-05	µM	S1-36	5.84261e-05	µM	11891	67.9641	WuhanPSV
1	2	S1-RBD-22	8.46754e-05	µM	S1-36	1.94754e-05	µM	18041	103.498	WuhanPSV
1	2	S1-RBD-22	8.46754e-05	µM	S1-36	6.49178e-06	µM	8456	48.1171	WuhanPSV
1	2	S1-RBD-22	8.46754e-05	µM	S1-36	2.16393e-06	µM	15701	89.9778	WuhanPSV
1	2	S1-RBD-22	8.46754e-05	µM	S1-36	0	µM	19238	110.414	WuhanPSV
1	2	S1-RBD-22	2.82251e-05	µM	S1-36	0.383333	µM	192	0.368821	WuhanPSV
1	2	S1-RBD-22	2.82251e-05	µM	S1-36	0.127778	µM	568	2.5413	WuhanPSV
1	2	S1-RBD-22	2.82251e-05	µM	S1-36	0.0425926	µM	1499	7.9205	WuhanPSV
1	2	S1-RBD-22	2.82251e-05	µM	S1-36	0.0141975	µM	4431	24.8612	WuhanPSV
1	2	S1-RBD-22	2.82251e-05	µM	S1-36	0.00473251	µM	7579	43.0499	WuhanPSV
1	2	S1-RBD-22	2.82251e-05	µM	S1-36	0.0015775	µM	13840	79.2252	WuhanPSV
1	2	S1-RBD-22	2.82251e-05	µM	S1-36	0.000525834	µM	17095	98.0322	WuhanPSV
1	2	S1-RBD-22	2.82251e-05	µM	S1-36	0.000175278	µM	21337	122.542	WuhanPSV
1	2	S1-RBD-22	2.82251e-05	µM	S1-36	5.84261e-05	µM	8939	50.9078	WuhanPSV
1	2	S1-RBD-22	2.82251e-05	µM	S1-36	1.94754e-05	µM	9247	52.6874	WuhanPSV
1	2	S1-RBD-22	2.82251e-05	µM	S1-36	6.49178e-06	µM	14391	82.4088	WuhanPSV
1	2	S1-RBD-22	2.82251e-05	µM	S1-36	2.16393e-06	µM	9396	53.5483	WuhanPSV
1	2	S1-RBD-22	2.82251e-05	µM	S1-36	0	µM	12193	69.709	WuhanPSV
1	2	S1-RBD-22	9.40838e-06	µM	S1-36	0.383333	µM	188	0.345709	WuhanPSV
1	2	S1-RBD-22	9.40838e-06	µM	S1-36	0.127778	µM	268	0.807939	WuhanPSV
1	2	S1-RBD-22	9.40838e-06	µM	S1-36	0.0425926	µM	3238	17.9682	WuhanPSV
1	2	S1-RBD-22	9.40838e-06	µM	S1-36	0.0141975	µM	2279	12.4272	WuhanPSV
1	2	S1-RBD-22	9.40838e-06	µM	S1-36	0.00473251	µM	7180	40.7446	WuhanPSV
1	2	S1-RBD-22	9.40838e-06	µM	S1-36	0.0015775	µM	11975	68.4495	WuhanPSV
1	2	S1-RBD-22	9.40838e-06	µM	S1-36	0.000525834	µM	13735	78.6185	WuhanPSV
1	2	S1-RBD-22	9.40838e-06	µM	S1-36	0.000175278	µM	12221	69.8708	WuhanPSV
1	2	S1-RBD-22	9.40838e-06	µM	S1-36	5.84261e-05	µM	17455	100.112	WuhanPSV
1	2	S1-RBD-22	9.40838e-06	µM	S1-36	1.94754e-05	µM	13401	76.6887	WuhanPSV
1	2	S1-RBD-22	9.40838e-06	µM	S1-36	6.49178e-06	µM	9363	53.3577	WuhanPSV
1	2	S1-RBD-22	9.40838e-06	µM	S1-36	2.16393e-06	µM	11321	64.6707	WuhanPSV
1	2	S1-RBD-22	9.40838e-06	µM	S1-36	0	µM	16229	93.0285	WuhanPSV
1	2	S1-RBD-22	0	µM	S1-36	0.383333	µM	485	2.06174	WuhanPSV
1	2	S1-RBD-22	0	µM	S1-36	0.127778	µM	1408	7.39471	WuhanPSV
1	2	S1-RBD-22	0	µM	S1-36	0.0425926	µM	2321	12.6699	WuhanPSV
1	2	S1-RBD-22	0	µM	S1-36	0.0141975	µM	10618	60.6089	WuhanPSV
1	2	S1-RBD-22	0	µM	S1-36	0.00473251	µM	11394	65.0925	WuhanPSV
1	2	S1-RBD-22	0	µM	S1-36	0.0015775	µM	9421	53.6928	WuhanPSV
1	2	S1-RBD-22	0	µM	S1-36	0.000525834	µM	16866	96.709	WuhanPSV
1	2	S1-RBD-22	0	µM	S1-36	0.000175278	µM	8050	45.7713	WuhanPSV
1	2	S1-RBD-22	0	µM	S1-36	5.84261e-05	µM	11664	66.6525	WuhanPSV
1	2	S1-RBD-22	0	µM	S1-36	1.94754e-05	µM	17580	100.834	WuhanPSV
1	2	S1-RBD-22	0	µM	S1-36	6.49178e-06	µM	11308	64.5956	WuhanPSV
1	2	S1-RBD-22	0	µM	S1-36	2.16393e-06	µM	10455	59.6671	WuhanPSV
1	1	S1-RBD-22	0	µM	S1-36	0	µM	22105	126.979	WuhanPSV
1	2	S1-RBD-22	0	µM	S1-36	0	µM	16818	96.4317	WuhanPSV
1	3	S1-RBD-22	0	µM	S1-36	0	µM	15251	87.3778	WuhanPSV
1	4	S1-RBD-22	0	µM	S1-36	0	µM	13586	77.7576	WuhanPSV
1	5	S1-RBD-22	0	µM	S1-36	0	µM	17860	102.452	WuhanPSV
1	6	S1-RBD-22	0	µM	S1-36	0	µM	14016	80.2421	WuhanPSV
1	7	S1-RBD-22	0	µM	S1-36	0	µM	19421	111.471	WuhanPSV
1	8	S1-RBD-22	0	µM	S1-36	0	µM	23111	132.792	WuhanPSV
1	9	S1-RBD-22	0	µM	S1-36	0	µM	14908	85.396	WuhanPSV
1	10	S1-RBD-22	0	µM	S1-36	0	µM	17769	101.926	WuhanPSV
1	11	S1-RBD-22	0	µM	S1-36	0	µM	14441	82.6977	WuhanPSV
1	12	S1-RBD-22	0	µM	S1-36	0	µM	19941	114.476	WuhanPSV
1	1	S1-RBD-22	100	µM	S1-36	100	µM	107	-0.122298	WuhanPSV
1	2	S1-RBD-22	100	µM	S1-36	100	µM	156	0.160817	WuhanPSV
1	3	S1-RBD-22	100	µM	S1-36	100	µM	90	-0.220522	WuhanPSV
1	4	S1-RBD-22	100	µM	S1-36	100	µM	126	-0.0125187	WuhanPSV
1	5	S1-RBD-22	100	µM	S1-36	100	µM	172	0.253263	WuhanPSV
1	6	S1-RBD-22	100	µM	S1-36	100	µM	127	-0.00674085	WuhanPSV
1	7	S1-RBD-22	100	µM	S1-36	100	µM	119	-0.0529638	WuhanPSV
1	8	S1-RBD-22	100	µM	S1-36	100	µM	118	-0.0587417	WuhanPSV
1	9	S1-RBD-22	100	µM	S1-36	100	µM	114	-0.0818532	WuhanPSV
1	10	S1-RBD-22	100	µM	S1-36	100	µM	146	0.103039	WuhanPSV
1	11	S1-RBD-22	100	µM	S1-36	100	µM	144	0.0914829	WuhanPSV
1	12	S1-RBD-22	100	µM	S1-36	100	µM	119	-0.0529638	WuhanPSV
1	3	S1-RBD-22	1.66667	µM	S1-36	0.383333	µM	302	1.00439	WuhanPSV
1	3	S1-RBD-22	0.555556	µM	S1-36	0.127778	µM	276	0.854162	WuhanPSV
1	3	S1-RBD-22	0.185185	µM	S1-36	0.0425926	µM	259	0.755938	WuhanPSV
1	3	S1-RBD-22	0.0617284	µM	S1-36	0.0141975	µM	5506	31.0724	WuhanPSV
1	3	S1-RBD-22	0.0205761	µM	S1-36	0.00473251	µM	7223	40.993	WuhanPSV
1	3	S1-RBD-22	0.00685871	µM	S1-36	0.0015775	µM	6016	34.0191	WuhanPSV
1	3	S1-RBD-22	0.00228624	µM	S1-36	0.000525834	µM	19257	110.524	WuhanPSV
1	3	S1-RBD-22	0.000762079	µM	S1-36	0.000175278	µM	9606	54.7617	WuhanPSV
1	3	S1-RBD-22	0.000254026	µM	S1-36	5.84261e-05	µM	18385	105.486	WuhanPSV
1	3	S1-RBD-22	8.46754e-05	µM	S1-36	1.94754e-05	µM	10250	58.4826	WuhanPSV
1	3	S1-RBD-22	2.82251e-05	µM	S1-36	6.49178e-06	µM	17877	102.55	WuhanPSV
1	3	S1-RBD-22	9.40838e-06	µM	S1-36	2.16393e-06	µM	17812	102.175	WuhanPSV
1	4	S1-RBD-22	1.66667	µM	S1-36	0.383333	µM	236	0.623047	WuhanPSV
1	4	S1-RBD-22	0.555556	µM	S1-36	0.127778	µM	499	2.14263	WuhanPSV
1	4	S1-RBD-22	0.185185	µM	S1-36	0.0425926	µM	786	3.80088	WuhanPSV
1	4	S1-RBD-22	0.0617284	µM	S1-36	0.0141975	µM	3171	17.5811	WuhanPSV
1	4	S1-RBD-22	0.0205761	µM	S1-36	0.00473251	µM	7559	42.9344	WuhanPSV
1	4	S1-RBD-22	0.00685871	µM	S1-36	0.0015775	µM	12040	68.825	WuhanPSV
1	4	S1-RBD-22	0.00228624	µM	S1-36	0.000525834	µM	8835	50.3069	WuhanPSV
1	4	S1-RBD-22	0.000762079	µM	S1-36	0.000175278	µM	17376	99.6557	WuhanPSV
1	4	S1-RBD-22	0.000254026	µM	S1-36	5.84261e-05	µM	11312	64.6187	WuhanPSV
1	4	S1-RBD-22	8.46754e-05	µM	S1-36	1.94754e-05	µM	12990	74.314	WuhanPSV
1	4	S1-RBD-22	2.82251e-05	µM	S1-36	6.49178e-06	µM	19634	112.702	WuhanPSV
1	4	S1-RBD-22	9.40838e-06	µM	S1-36	2.16393e-06	µM	16883	96.8072	WuhanPSV
2	1	S1-RBD-22	1.66667	µM	S1-36	0.383333	µM	250	0.844643	WuhanPSV
2	1	S1-RBD-22	1.66667	µM	S1-36	0.127778	µM	260	0.914448	WuhanPSV
2	1	S1-RBD-22	1.66667	µM	S1-36	0.0425926	µM	247	0.823701	WuhanPSV
2	1	S1-RBD-22	1.66667	µM	S1-36	0.0141975	µM	332	1.41705	WuhanPSV
2	1	S1-RBD-22	1.66667	µM	S1-36	0.00473251	µM	263	0.935389	WuhanPSV
2	1	S1-RBD-22	1.66667	µM	S1-36	0.0015775	µM	313	1.28442	WuhanPSV
2	1	S1-RBD-22	1.66667	µM	S1-36	0.000525834	µM	257	0.893506	WuhanPSV
2	1	S1-RBD-22	1.66667	µM	S1-36	0.000175278	µM	226	0.67711	WuhanPSV
2	1	S1-RBD-22	1.66667	µM	S1-36	5.84261e-05	µM	908	5.43782	WuhanPSV
2	1	S1-RBD-22	1.66667	µM	S1-36	1.94754e-05	µM	264	0.94237	WuhanPSV
2	1	S1-RBD-22	1.66667	µM	S1-36	6.49178e-06	µM	398	1.87776	WuhanPSV
2	1	S1-RBD-22	1.66667	µM	S1-36	2.16393e-06	µM	347	1.52175	WuhanPSV
2	1	S1-RBD-22	1.66667	µM	S1-36	0	µM	183	0.376948	WuhanPSV
2	1	S1-RBD-22	0.555556	µM	S1-36	0.383333	µM	279	1.04708	WuhanPSV
2	1	S1-RBD-22	0.555556	µM	S1-36	0.127778	µM	411	1.96851	WuhanPSV
2	1	S1-RBD-22	0.555556	µM	S1-36	0.0425926	µM	718	4.11153	WuhanPSV
2	1	S1-RBD-22	0.555556	µM	S1-36	0.0141975	µM	386	1.79399	WuhanPSV
2	1	S1-RBD-22	0.555556	µM	S1-36	0.00473251	µM	317	1.31234	WuhanPSV
2	1	S1-RBD-22	0.555556	µM	S1-36	0.0015775	µM	384	1.78003	WuhanPSV
2	1	S1-RBD-22	0.555556	µM	S1-36	0.000525834	µM	397	1.87078	WuhanPSV
2	1	S1-RBD-22	0.555556	µM	S1-36	0.000175278	µM	211	0.572403	WuhanPSV
2	1	S1-RBD-22	0.555556	µM	S1-36	5.84261e-05	µM	264	0.94237	WuhanPSV
2	1	S1-RBD-22	0.555556	µM	S1-36	1.94754e-05	µM	333	1.42403	WuhanPSV
2	1	S1-RBD-22	0.555556	µM	S1-36	6.49178e-06	µM	283	1.075	WuhanPSV
2	1	S1-RBD-22	0.555556	µM	S1-36	2.16393e-06	µM	549	2.93182	WuhanPSV
2	1	S1-RBD-22	0.555556	µM	S1-36	0	µM	394	1.84984	WuhanPSV
2	1	S1-RBD-22	0.185185	µM	S1-36	0.383333	µM	243	0.795779	WuhanPSV
2	1	S1-RBD-22	0.185185	µM	S1-36	0.127778	µM	380	1.75211	WuhanPSV
2	1	S1-RBD-22	0.185185	µM	S1-36	0.0425926	µM	325	1.36818	WuhanPSV
2	1	S1-RBD-22	0.185185	µM	S1-36	0.0141975	µM	468	2.3664	WuhanPSV
2	1	S1-RBD-22	0.185185	µM	S1-36	0.00473251	µM	542	2.88295	WuhanPSV
2	1	S1-RBD-22	0.185185	µM	S1-36	0.0015775	µM	369	1.67532	WuhanPSV
2	1	S1-RBD-22	0.185185	µM	S1-36	0.000525834	µM	304	1.22159	WuhanPSV
2	1	S1-RBD-22	0.185185	µM	S1-36	0.000175278	µM	227	0.684091	WuhanPSV
2	1	S1-RBD-22	0.185185	µM	S1-36	5.84261e-05	µM	292	1.13782	WuhanPSV
2	1	S1-RBD-22	0.185185	µM	S1-36	1.94754e-05	µM	630	3.49724	WuhanPSV
2	1	S1-RBD-22	0.185185	µM	S1-36	6.49178e-06	µM	317	1.31234	WuhanPSV
2	1	S1-RBD-22	0.185185	µM	S1-36	2.16393e-06	µM	370	1.6823	WuhanPSV
2	1	S1-RBD-22	0.185185	µM	S1-36	0	µM	5922	40.4381	WuhanPSV
2	1	S1-RBD-22	0.0617284	µM	S1-36	0.383333	µM	291	1.13084	WuhanPSV
2	1	S1-RBD-22	0.0617284	µM	S1-36	0.127778	µM	311	1.27045	WuhanPSV
2	1	S1-RBD-22	0.0617284	µM	S1-36	0.0425926	µM	419	2.02435	WuhanPSV
2	1	S1-RBD-22	0.0617284	µM	S1-36	0.0141975	µM	318	1.31932	WuhanPSV
2	1	S1-RBD-22	0.0617284	µM	S1-36	0.00473251	µM	408	1.94756	WuhanPSV
2	1	S1-RBD-22	0.0617284	µM	S1-36	0.0015775	µM	1082	6.65243	WuhanPSV
2	1	S1-RBD-22	0.0617284	µM	S1-36	0.000525834	µM	3090	20.6693	WuhanPSV
2	1	S1-RBD-22	0.0617284	µM	S1-36	0.000175278	µM	639	3.56006	WuhanPSV
2	1	S1-RBD-22	0.0617284	µM	S1-36	5.84261e-05	µM	3545	23.8455	WuhanPSV
2	1	S1-RBD-22	0.0617284	µM	S1-36	1.94754e-05	µM	1183	7.35747	WuhanPSV
2	1	S1-RBD-22	0.0617284	µM	S1-36	6.49178e-06	µM	4260	28.8365	WuhanPSV
2	1	S1-RBD-22	0.0617284	µM	S1-36	2.16393e-06	µM	2815	18.7497	WuhanPSV
2	1	S1-RBD-22	0.0617284	µM	S1-36	0	µM	7741	53.1357	WuhanPSV
2	1	S1-RBD-22	0.0205761	µM	S1-36	0.383333	µM	368	1.66834	WuhanPSV
2	1	S1-RBD-22	0.0205761	µM	S1-36	0.127778	µM	416	2.00341	WuhanPSV
2	1	S1-RBD-22	0.0205761	µM	S1-36	0.0425926	µM	271	0.991234	WuhanPSV
2	1	S1-RBD-22	0.0205761	µM	S1-36	0.0141975	µM	488	2.50601	WuhanPSV
2	1	S1-RBD-22	0.0205761	µM	S1-36	0.00473251	µM	5014	34.0998	WuhanPSV
2	1	S1-RBD-22	0.0205761	µM	S1-36	0.0015775	µM	4619	31.3425	WuhanPSV
2	1	S1-RBD-22	0.0205761	µM	S1-36	0.000525834	µM	8227	56.5282	WuhanPSV
2	1	S1-RBD-22	0.0205761	µM	S1-36	0.000175278	µM	5840	39.8657	WuhanPSV
2	1	S1-RBD-22	0.0205761	µM	S1-36	5.84261e-05	µM	6481	44.3403	WuhanPSV
2	1	S1-RBD-22	0.0205761	µM	S1-36	1.94754e-05	µM	9984	68.793	WuhanPSV
2	1	S1-RBD-22	0.0205761	µM	S1-36	6.49178e-06	µM	4118	27.8453	WuhanPSV
2	1	S1-RBD-22	0.0205761	µM	S1-36	2.16393e-06	µM	5339	36.3685	WuhanPSV
2	1	S1-RBD-22	0.0205761	µM	S1-36	0	µM	8548	58.769	WuhanPSV
2	1	S1-RBD-22	0.00685871	µM	S1-36	0.383333	µM	284	1.08198	WuhanPSV
2	1	S1-RBD-22	0.00685871	µM	S1-36	0.127778	µM	330	1.40308	WuhanPSV
2	1	S1-RBD-22	0.00685871	µM	S1-36	0.0425926	µM	326	1.37516	WuhanPSV
2	1	S1-RBD-22	0.00685871	µM	S1-36	0.0141975	µM	3104	20.767	WuhanPSV
2	1	S1-RBD-22	0.00685871	µM	S1-36	0.00473251	µM	6540	44.7521	WuhanPSV
2	1	S1-RBD-22	0.00685871	µM	S1-36	0.0015775	µM	4825	32.7805	WuhanPSV
2	1	S1-RBD-22	0.00685871	µM	S1-36	0.000525834	µM	5440	37.0735	WuhanPSV
2	1	S1-RBD-22	0.00685871	µM	S1-36	0.000175278	µM	7585	52.0467	WuhanPSV
2	1	S1-RBD-22	0.00685871	µM	S1-36	5.84261e-05	µM	6961	47.6909	WuhanPSV
2	1	S1-RBD-22	0.00685871	µM	S1-36	1.94754e-05	µM	9971	68.7023	WuhanPSV
2	1	S1-RBD-22	0.00685871	µM	S1-36	6.49178e-06	µM	11565	79.8292	WuhanPSV
2	1	S1-RBD-22	0.00685871	µM	S1-36	2.16393e-06	µM	10981	75.7526	WuhanPSV
2	1	S1-RBD-22	0.00685871	µM	S1-36	0	µM	11330	78.1888	WuhanPSV
2	1	S1-RBD-22	0.00228624	µM	S1-36	0.383333	µM	294	1.15179	WuhanPSV
2	1	S1-RBD-22	0.00228624	µM	S1-36	0.127778	µM	396	1.8638	WuhanPSV
2	1	S1-RBD-22	0.00228624	µM	S1-36	0.0425926	µM	1917	12.4812	WuhanPSV
2	1	S1-RBD-22	0.00228624	µM	S1-36	0.0141975	µM	5809	39.6493	WuhanPSV
2	1	S1-RBD-22	0.00228624	µM	S1-36	0.00473251	µM	6901	47.2721	WuhanPSV
2	1	S1-RBD-22	0.00228624	µM	S1-36	0.0015775	µM	10438	71.9622	WuhanPSV
2	1	S1-RBD-22	0.00228624	µM	S1-36	0.000525834	µM	9807	67.5575	WuhanPSV
2	1	S1-RBD-22	0.00228624	µM	S1-36	0.000175278	µM	12243	84.562	WuhanPSV
2	1	S1-RBD-22	0.00228624	µM	S1-36	5.84261e-05	µM	10341	71.2851	WuhanPSV
2	1	S1-RBD-22	0.00228624	µM	S1-36	1.94754e-05	µM	7639	52.4237	WuhanPSV
2	1	S1-RBD-22	0.00228624	µM	S1-36	6.49178e-06	µM	11182	77.1557	WuhanPSV
2	1	S1-RBD-22	0.00228624	µM	S1-36	2.16393e-06	µM	10100	69.6028	WuhanPSV
2	1	S1-RBD-22	0.00228624	µM	S1-36	0	µM	10523	72.5555	WuhanPSV
2	1	S1-RBD-22	0.000762079	µM	S1-36	0.383333	µM	415	1.99643	WuhanPSV
2	1	S1-RBD-22	0.000762079	µM	S1-36	0.127778	µM	114	-0.104708	WuhanPSV
2	1	S1-RBD-22	0.000762079	µM	S1-36	0.0425926	µM	2500	16.5508	WuhanPSV
2	1	S1-RBD-22	0.000762079	µM	S1-36	0.0141975	µM	11586	79.9758	WuhanPSV
2	1	S1-RBD-22	0.000762079	µM	S1-36	0.00473251	µM	10833	74.7195	WuhanPSV
2	1	S1-RBD-22	0.000762079	µM	S1-36	0.0015775	µM	12018	82.9914	WuhanPSV
2	1	S1-RBD-22	0.000762079	µM	S1-36	0.000525834	µM	11089	76.5065	WuhanPSV
2	1	S1-RBD-22	0.000762079	µM	S1-36	0.000175278	µM	11303	78.0003	WuhanPSV
2	1	S1-RBD-22	0.000762079	µM	S1-36	5.84261e-05	µM	15472	107.102	WuhanPSV
2	1	S1-RBD-22	0.000762079	µM	S1-36	1.94754e-05	µM	11442	78.9706	WuhanPSV
2	1	S1-RBD-22	0.000762079	µM	S1-36	6.49178e-06	µM	17051	118.124	WuhanPSV
2	1	S1-RBD-22	0.000762079	µM	S1-36	2.16393e-06	µM	12518	86.4816	WuhanPSV
2	1	S1-RBD-22	0.000762079	µM	S1-36	0	µM	9445	65.0305	WuhanPSV
2	1	S1-RBD-22	0.000254026	µM	S1-36	0.383333	µM	648	3.62289	WuhanPSV
2	1	S1-RBD-22	0.000254026	µM	S1-36	0.127778	µM	230	0.705032	WuhanPSV
2	1	S1-RBD-22	0.000254026	µM	S1-36	0.0425926	µM	4539	30.7841	WuhanPSV
2	1	S1-RBD-22	0.000254026	µM	S1-36	0.0141975	µM	9510	65.4842	WuhanPSV
2	1	S1-RBD-22	0.000254026	µM	S1-36	0.00473251	µM	13150	90.8933	WuhanPSV
2	1	S1-RBD-22	0.000254026	µM	S1-36	0.0015775	µM	14311	98.9977	WuhanPSV
2	1	S1-RBD-22	0.000254026	µM	S1-36	0.000525834	µM	14308	98.9768	WuhanPSV
2	1	S1-RBD-22	0.000254026	µM	S1-36	0.000175278	µM	12775	88.2756	WuhanPSV
2	1	S1-RBD-22	0.000254026	µM	S1-36	5.84261e-05	µM	19231	133.342	WuhanPSV
2	1	S1-RBD-22	0.000254026	µM	S1-36	1.94754e-05	µM	6996	47.9352	WuhanPSV
2	1	S1-RBD-22	0.000254026	µM	S1-36	6.49178e-06	µM	10109	69.6656	WuhanPSV
2	1	S1-RBD-22	0.000254026	µM	S1-36	2.16393e-06	µM	11782	81.344	WuhanPSV
2	1	S1-RBD-22	0.000254026	µM	S1-36	0	µM	10409	71.7597	WuhanPSV
2	1	S1-RBD-22	8.46754e-05	µM	S1-36	0.383333	µM	171	0.293182	WuhanPSV
2	1	S1-RBD-22	8.46754e-05	µM	S1-36	0.127778	µM	932	5.60536	WuhanPSV
2	1	S1-RBD-22	8.46754e-05	µM	S1-36	0.0425926	µM	4245	28.7318	WuhanPSV
2	1	S1-RBD-22	8.46754e-05	µM	S1-36	0.0141975	µM	9989	68.8279	WuhanPSV
2	1	S1-RBD-22	8.46754e-05	µM	S1-36	0.00473251	µM	10906	75.229	WuhanPSV
2	1	S1-RBD-22	8.46754e-05	µM	S1-36	0.0015775	µM	11419	78.8101	WuhanPSV
2	1	S1-RBD-22	8.46754e-05	µM	S1-36	0.000525834	µM	14907	103.158	WuhanPSV
2	1	S1-RBD-22	8.46754e-05	µM	S1-36	0.000175278	µM	9041	62.2104	WuhanPSV
2	1	S1-RBD-22	8.46754e-05	µM	S1-36	5.84261e-05	µM	11007	75.9341	WuhanPSV
2	1	S1-RBD-22	8.46754e-05	µM	S1-36	1.94754e-05	µM	11168	77.0579	WuhanPSV
2	1	S1-RBD-22	8.46754e-05	µM	S1-36	6.49178e-06	µM	7222	49.5128	WuhanPSV
2	1	S1-RBD-22	8.46754e-05	µM	S1-36	2.16393e-06	µM	20176	139.938	WuhanPSV
2	1	S1-RBD-22	8.46754e-05	µM	S1-36	0	µM	10903	75.2081	WuhanPSV
2	1	S1-RBD-22	2.82251e-05	µM	S1-36	0.383333	µM	1080	6.63847	WuhanPSV
2	1	S1-RBD-22	2.82251e-05	µM	S1-36	0.127778	µM	1074	6.59659	WuhanPSV
2	1	S1-RBD-22	2.82251e-05	µM	S1-36	0.0425926	µM	2136	14.0099	WuhanPSV
2	1	S1-RBD-22	2.82251e-05	µM	S1-36	0.0141975	µM	6141	41.9669	WuhanPSV
2	1	S1-RBD-22	2.82251e-05	µM	S1-36	0.00473251	µM	8943	61.5263	WuhanPSV
2	1	S1-RBD-22	2.82251e-05	µM	S1-36	0.0015775	µM	9151	62.9782	WuhanPSV
2	1	S1-RBD-22	2.82251e-05	µM	S1-36	0.000525834	µM	10930	75.3966	WuhanPSV
2	1	S1-RBD-22	2.82251e-05	µM	S1-36	0.000175278	µM	11712	80.8553	WuhanPSV
2	1	S1-RBD-22	2.82251e-05	µM	S1-36	5.84261e-05	µM	11989	82.7889	WuhanPSV
2	1	S1-RBD-22	2.82251e-05	µM	S1-36	1.94754e-05	µM	17435	120.805	WuhanPSV
2	1	S1-RBD-22	2.82251e-05	µM	S1-36	6.49178e-06	µM	12638	87.3193	WuhanPSV
2	1	S1-RBD-22	2.82251e-05	µM	S1-36	2.16393e-06	µM	8223	56.5003	WuhanPSV
2	1	S1-RBD-22	2.82251e-05	µM	S1-36	0	µM	14858	102.816	WuhanPSV
2	1	S1-RBD-22	9.40838e-06	µM	S1-36	0.383333	µM	170	0.286201	WuhanPSV
2	1	S1-RBD-22	9.40838e-06	µM	S1-36	0.127778	µM	207	0.54448	WuhanPSV
2	1	S1-RBD-22	9.40838e-06	µM	S1-36	0.0425926	µM	3345	22.4493	WuhanPSV
2	1	S1-RBD-22	9.40838e-06	µM	S1-36	0.0141975	µM	2794	18.6031	WuhanPSV
2	1	S1-RBD-22	9.40838e-06	µM	S1-36	0.00473251	µM	9929	68.4091	WuhanPSV
2	1	S1-RBD-22	9.40838e-06	µM	S1-36	0.0015775	µM	9994	68.8628	WuhanPSV
2	1	S1-RBD-22	9.40838e-06	µM	S1-36	0.000525834	µM	18880	130.892	WuhanPSV
2	1	S1-RBD-22	9.40838e-06	µM	S1-36	0.000175278	µM	11149	76.9253	WuhanPSV
2	1	S1-RBD-22	9.40838e-06	µM	S1-36	5.84261e-05	µM	11258	77.6862	WuhanPSV
2	1	S1-RBD-22	9.40838e-06	µM	S1-36	1.94754e-05	µM	9055	62.3081	WuhanPSV
2	1	S1-RBD-22	9.40838e-06	µM	S1-36	6.49178e-06	µM	17368	120.337	WuhanPSV
2	1	S1-RBD-22	9.40838e-06	µM	S1-36	2.16393e-06	µM	10999	75.8782	WuhanPSV
2	1	S1-RBD-22	9.40838e-06	µM	S1-36	0	µM	10967	75.6549	WuhanPSV
2	1	S1-RBD-22	0	µM	S1-36	0.383333	µM	387	1.80097	WuhanPSV
2	1	S1-RBD-22	0	µM	S1-36	0.127778	µM	1585	10.1636	WuhanPSV
2	1	S1-RBD-22	0	µM	S1-36	0.0425926	µM	4282	28.9901	WuhanPSV
2	1	S1-RBD-22	0	µM	S1-36	0.0141975	µM	6260	42.7976	WuhanPSV
2	1	S1-RBD-22	0	µM	S1-36	0.00473251	µM	15061	104.233	WuhanPSV
2	1	S1-RBD-22	0	µM	S1-36	0.0015775	µM	6946	47.5862	WuhanPSV
2	1	S1-RBD-22	0	µM	S1-36	0.000525834	µM	17767	123.122	WuhanPSV
2	1	S1-RBD-22	0	µM	S1-36	0.000175278	µM	12094	83.5219	WuhanPSV
2	1	S1-RBD-22	0	µM	S1-36	5.84261e-05	µM	9971	68.7023	WuhanPSV
2	1	S1-RBD-22	0	µM	S1-36	1.94754e-05	µM	15301	105.908	WuhanPSV
2	1	S1-RBD-22	0	µM	S1-36	6.49178e-06	µM	10892	75.1313	WuhanPSV
2	1	S1-RBD-22	0	µM	S1-36	2.16393e-06	µM	18037	125.007	WuhanPSV
2	2	S1-RBD-22	1.66667	µM	S1-36	0.383333	µM	253	0.865584	WuhanPSV
2	2	S1-RBD-22	1.66667	µM	S1-36	0.127778	µM	316	1.30536	WuhanPSV
2	2	S1-RBD-22	1.66667	µM	S1-36	0.0425926	µM	342	1.48685	WuhanPSV
2	2	S1-RBD-22	1.66667	µM	S1-36	0.0141975	µM	358	1.59854	WuhanPSV
2	2	S1-RBD-22	1.66667	µM	S1-36	0.00473251	µM	407	1.94058	WuhanPSV
2	2	S1-RBD-22	1.66667	µM	S1-36	0.0015775	µM	430	2.10114	WuhanPSV
2	2	S1-RBD-22	1.66667	µM	S1-36	0.000525834	µM	274	1.01218	WuhanPSV
2	2	S1-RBD-22	1.66667	µM	S1-36	0.000175278	µM	313	1.28442	WuhanPSV
2	2	S1-RBD-22	1.66667	µM	S1-36	5.84261e-05	µM	287	1.10292	WuhanPSV
2	2	S1-RBD-22	1.66667	µM	S1-36	1.94754e-05	µM	371	1.68929	WuhanPSV
2	2	S1-RBD-22	1.66667	µM	S1-36	6.49178e-06	µM	294	1.15179	WuhanPSV
2	2	S1-RBD-22	1.66667	µM	S1-36	2.16393e-06	µM	345	1.50779	WuhanPSV
2	2	S1-RBD-22	1.66667	µM	S1-36	0	µM	560	3.0086	WuhanPSV
2	2	S1-RBD-22	0.555556	µM	S1-36	0.383333	µM	533	2.82013	WuhanPSV
2	2	S1-RBD-22	0.555556	µM	S1-36	0.127778	µM	313	1.28442	WuhanPSV
2	2	S1-RBD-22	0.555556	µM	S1-36	0.0425926	µM	458	2.29659	WuhanPSV
2	2	S1-RBD-22	0.555556	µM	S1-36	0.0141975	µM	304	1.22159	WuhanPSV
2	2	S1-RBD-22	0.555556	µM	S1-36	0.00473251	µM	197	0.474675	WuhanPSV
2	2	S1-RBD-22	0.555556	µM	S1-36	0.0015775	µM	265	0.949351	WuhanPSV
2	2	S1-RBD-22	0.555556	µM	S1-36	0.000525834	µM	804	4.71185	WuhanPSV
2	2	S1-RBD-22	0.555556	µM	S1-36	0.000175278	µM	265	0.949351	WuhanPSV
2	2	S1-RBD-22	0.555556	µM	S1-36	5.84261e-05	µM	235	0.739935	WuhanPSV
2	2	S1-RBD-22	0.555556	µM	S1-36	1.94754e-05	µM	276	1.02614	WuhanPSV
2	2	S1-RBD-22	0.555556	µM	S1-36	6.49178e-06	µM	349	1.53571	WuhanPSV
2	2	S1-RBD-22	0.555556	µM	S1-36	2.16393e-06	µM	303	1.21461	WuhanPSV
2	2	S1-RBD-22	0.555556	µM	S1-36	0	µM	202	0.509578	WuhanPSV
2	2	S1-RBD-22	0.185185	µM	S1-36	0.383333	µM	353	1.56364	WuhanPSV
2	2	S1-RBD-22	0.185185	µM	S1-36	0.127778	µM	304	1.22159	WuhanPSV
2	2	S1-RBD-22	0.185185	µM	S1-36	0.0425926	µM	338	1.45893	WuhanPSV
2	2	S1-RBD-22	0.185185	µM	S1-36	0.0141975	µM	286	1.09594	WuhanPSV
2	2	S1-RBD-22	0.185185	µM	S1-36	0.00473251	µM	356	1.58458	WuhanPSV
2	2	S1-RBD-22	0.185185	µM	S1-36	0.0015775	µM	370	1.6823	WuhanPSV
2	2	S1-RBD-22	0.185185	µM	S1-36	0.000525834	µM	259	0.907467	WuhanPSV
2	2	S1-RBD-22	0.185185	µM	S1-36	0.000175278	µM	651	3.64383	WuhanPSV
2	2	S1-RBD-22	0.185185	µM	S1-36	5.84261e-05	µM	271	0.991234	WuhanPSV
2	2	S1-RBD-22	0.185185	µM	S1-36	1.94754e-05	µM	885	5.27727	WuhanPSV
2	2	S1-RBD-22	0.185185	µM	S1-36	6.49178e-06	µM	825	4.85844	WuhanPSV
2	2	S1-RBD-22	0.185185	µM	S1-36	2.16393e-06	µM	1091	6.71526	WuhanPSV
2	2	S1-RBD-22	0.185185	µM	S1-36	0	µM	5412	36.8781	WuhanPSV
2	2	S1-RBD-22	0.0617284	µM	S1-36	0.383333	µM	451	2.24773	WuhanPSV
2	2	S1-RBD-22	0.0617284	µM	S1-36	0.127778	µM	310	1.26347	WuhanPSV
2	2	S1-RBD-22	0.0617284	µM	S1-36	0.0425926	µM	599	3.28084	WuhanPSV
2	2	S1-RBD-22	0.0617284	µM	S1-36	0.0141975	µM	381	1.75909	WuhanPSV
2	2	S1-RBD-22	0.0617284	µM	S1-36	0.00473251	µM	726	4.16737	WuhanPSV
2	2	S1-RBD-22	0.0617284	µM	S1-36	0.0015775	µM	726	4.16737	WuhanPSV
2	2	S1-RBD-22	0.0617284	µM	S1-36	0.000525834	µM	1536	9.82159	WuhanPSV
2	2	S1-RBD-22	0.0617284	µM	S1-36	0.000175278	µM	3141	21.0253	WuhanPSV
2	2	S1-RBD-22	0.0617284	µM	S1-36	5.84261e-05	µM	3368	22.6099	WuhanPSV
2	2	S1-RBD-22	0.0617284	µM	S1-36	1.94754e-05	µM	1448	9.2073	WuhanPSV
2	2	S1-RBD-22	0.0617284	µM	S1-36	6.49178e-06	µM	2110	13.8284	WuhanPSV
2	2	S1-RBD-22	0.0617284	µM	S1-36	2.16393e-06	µM	3893	26.2747	WuhanPSV
2	2	S1-RBD-22	0.0617284	µM	S1-36	0	µM	5930	40.494	WuhanPSV
2	2	S1-RBD-22	0.0205761	µM	S1-36	0.383333	µM	280	1.05406	WuhanPSV
2	2	S1-RBD-22	0.0205761	µM	S1-36	0.127778	µM	301	1.20065	WuhanPSV
2	2	S1-RBD-22	0.0205761	µM	S1-36	0.0425926	µM	383	1.77305	WuhanPSV
2	2	S1-RBD-22	0.0205761	µM	S1-36	0.0141975	µM	384	1.78003	WuhanPSV
2	2	S1-RBD-22	0.0205761	µM	S1-36	0.00473251	µM	3831	25.8419	WuhanPSV
2	2	S1-RBD-22	0.0205761	µM	S1-36	0.0015775	µM	5333	36.3266	WuhanPSV
2	2	S1-RBD-22	0.0205761	µM	S1-36	0.000525834	µM	5933	40.5149	WuhanPSV
2	2	S1-RBD-22	0.0205761	µM	S1-36	0.000175278	µM	6035	41.2269	WuhanPSV
2	2	S1-RBD-22	0.0205761	µM	S1-36	5.84261e-05	µM	5210	35.468	WuhanPSV
2	2	S1-RBD-22	0.0205761	µM	S1-36	1.94754e-05	µM	6091	41.6179	WuhanPSV
2	2	S1-RBD-22	0.0205761	µM	S1-36	6.49178e-06	µM	5548	37.8274	WuhanPSV
2	2	S1-RBD-22	0.0205761	µM	S1-36	2.16393e-06	µM	12012	82.9495	WuhanPSV
2	2	S1-RBD-22	0.0205761	µM	S1-36	0	µM	8332	57.2612	WuhanPSV
2	2	S1-RBD-22	0.00685871	µM	S1-36	0.383333	µM	304	1.22159	WuhanPSV
2	2	S1-RBD-22	0.00685871	µM	S1-36	0.127778	µM	315	1.29838	WuhanPSV
2	2	S1-RBD-22	0.00685871	µM	S1-36	0.0425926	µM	1577	10.1078	WuhanPSV
2	2	S1-RBD-22	0.00685871	µM	S1-36	0.0141975	µM	2973	19.8526	WuhanPSV
2	2	S1-RBD-22	0.00685871	µM	S1-36	0.00473251	µM	5355	36.4802	WuhanPSV
2	2	S1-RBD-22	0.00685871	µM	S1-36	0.0015775	µM	7427	50.9438	WuhanPSV
2	2	S1-RBD-22	0.00685871	µM	S1-36	0.000525834	µM	9721	66.9571	WuhanPSV
2	2	S1-RBD-22	0.00685871	µM	S1-36	0.000175278	µM	10000	68.9047	WuhanPSV
2	2	S1-RBD-22	0.00685871	µM	S1-36	5.84261e-05	µM	8299	57.0308	WuhanPSV
2	2	S1-RBD-22	0.00685871	µM	S1-36	1.94754e-05	µM	15817	109.51	WuhanPSV
2	2	S1-RBD-22	0.00685871	µM	S1-36	6.49178e-06	µM	7541	51.7396	WuhanPSV
2	2	S1-RBD-22	0.00685871	µM	S1-36	2.16393e-06	µM	22112	153.453	WuhanPSV
2	2	S1-RBD-22	0.00685871	µM	S1-36	0	µM	17915	124.156	WuhanPSV
2	2	S1-RBD-22	0.00228624	µM	S1-36	0.383333	µM	29	-0.698052	WuhanPSV
2	2	S1-RBD-22	0.00228624	µM	S1-36	0.127778	µM	1917	12.4812	WuhanPSV
2	2	S1-RBD-22	0.00228624	µM	S1-36	0.0425926	µM	4081	27.587	WuhanPSV
2	2	S1-RBD-22	0.00228624	µM	S1-36	0.0141975	µM	7425	50.9299	WuhanPSV
2	2	S1-RBD-22	0.00228624	µM	S1-36	0.00473251	µM	6434	44.0122	WuhanPSV
2	2	S1-RBD-22	0.00228624	µM	S1-36	0.0015775	µM	11893	82.1188	WuhanPSV
2	2	S1-RBD-22	0.00228624	µM	S1-36	0.000525834	µM	6292	43.0209	WuhanPSV
2	2	S1-RBD-22	0.00228624	µM	S1-36	0.000175278	µM	9147	62.9503	WuhanPSV
2	2	S1-RBD-22	0.00228624	µM	S1-36	5.84261e-05	µM	7308	50.1131	WuhanPSV
2	2	S1-RBD-22	0.00228624	µM	S1-36	1.94754e-05	µM	15111	104.582	WuhanPSV
2	2	S1-RBD-22	0.00228624	µM	S1-36	6.49178e-06	µM	10151	69.9588	WuhanPSV
2	2	S1-RBD-22	0.00228624	µM	S1-36	2.16393e-06	µM	17821	123.499	WuhanPSV
2	2	S1-RBD-22	0.00228624	µM	S1-36	0	µM	11039	76.1575	WuhanPSV
2	2	S1-RBD-22	0.000762079	µM	S1-36	0.383333	µM	342	1.48685	WuhanPSV
2	2	S1-RBD-22	0.000762079	µM	S1-36	0.127778	µM	348	1.52873	WuhanPSV
2	2	S1-RBD-22	0.000762079	µM	S1-36	0.0425926	µM	7505	51.4883	WuhanPSV
2	2	S1-RBD-22	0.000762079	µM	S1-36	0.0141975	µM	7044	48.2703	WuhanPSV
2	2	S1-RBD-22	0.000762079	µM	S1-36	0.00473251	µM	13990	96.757	WuhanPSV
2	2	S1-RBD-22	0.000762079	µM	S1-36	0.0015775	µM	13725	94.9071	WuhanPSV
2	2	S1-RBD-22	0.000762079	µM	S1-36	0.000525834	µM	12112	83.6476	WuhanPSV
2	2	S1-RBD-22	0.000762079	µM	S1-36	0.000175278	µM	18634	129.174	WuhanPSV
2	2	S1-RBD-22	0.000762079	µM	S1-36	5.84261e-05	µM	11048	76.2203	WuhanPSV
2	2	S1-RBD-22	0.000762079	µM	S1-36	1.94754e-05	µM	17918	124.176	WuhanPSV
2	2	S1-RBD-22	0.000762079	µM	S1-36	6.49178e-06	µM	8889	61.1493	WuhanPSV
2	2	S1-RBD-22	0.000762079	µM	S1-36	2.16393e-06	µM	16283	112.763	WuhanPSV
2	2	S1-RBD-22	0.000762079	µM	S1-36	0	µM	9123	62.7828	WuhanPSV
2	2	S1-RBD-22	0.000254026	µM	S1-36	0.383333	µM	166	0.258279	WuhanPSV
2	2	S1-RBD-22	0.000254026	µM	S1-36	0.127778	µM	795	4.64903	WuhanPSV
2	2	S1-RBD-22	0.000254026	µM	S1-36	0.0425926	µM	4490	30.442	WuhanPSV
2	2	S1-RBD-22	0.000254026	µM	S1-36	0.0141975	µM	8605	59.1669	WuhanPSV
2	2	S1-RBD-22	0.000254026	µM	S1-36	0.00473251	µM	12410	85.7277	WuhanPSV
2	2	S1-RBD-22	0.000254026	µM	S1-36	0.0015775	µM	26690	185.41	WuhanPSV
2	2	S1-RBD-22	0.000254026	µM	S1-36	0.000525834	µM	10916	75.2989	WuhanPSV
2	2	S1-RBD-22	0.000254026	µM	S1-36	0.000175278	µM	10393	71.648	WuhanPSV
2	2	S1-RBD-22	0.000254026	µM	S1-36	5.84261e-05	µM	12156	83.9547	WuhanPSV
2	2	S1-RBD-22	0.000254026	µM	S1-36	1.94754e-05	µM	15885	109.985	WuhanPSV
2	2	S1-RBD-22	0.000254026	µM	S1-36	6.49178e-06	µM	17432	120.784	WuhanPSV
2	2	S1-RBD-22	0.000254026	µM	S1-36	2.16393e-06	µM	16646	115.297	WuhanPSV
2	2	S1-RBD-22	0.000254026	µM	S1-36	0	µM	15256	105.594	WuhanPSV
2	2	S1-RBD-22	8.46754e-05	µM	S1-36	0.383333	µM	1284	8.0625	WuhanPSV
2	2	S1-RBD-22	8.46754e-05	µM	S1-36	0.127778	µM	313	1.28442	WuhanPSV
2	2	S1-RBD-22	8.46754e-05	µM	S1-36	0.0425926	µM	2631	17.4653	WuhanPSV
2	2	S1-RBD-22	8.46754e-05	µM	S1-36	0.0141975	µM	8600	59.132	WuhanPSV
2	2	S1-RBD-22	8.46754e-05	µM	S1-36	0.00473251	µM	10102	69.6167	WuhanPSV
2	2	S1-RBD-22	8.46754e-05	µM	S1-36	0.0015775	µM	18899	131.024	WuhanPSV
2	2	S1-RBD-22	8.46754e-05	µM	S1-36	0.000525834	µM	13078	90.3907	WuhanPSV
2	2	S1-RBD-22	8.46754e-05	µM	S1-36	0.000175278	µM	7915	54.3503	WuhanPSV
2	2	S1-RBD-22	8.46754e-05	µM	S1-36	5.84261e-05	µM	12827	88.6386	WuhanPSV
2	2	S1-RBD-22	8.46754e-05	µM	S1-36	1.94754e-05	µM	15481	107.165	WuhanPSV
2	2	S1-RBD-22	8.46754e-05	µM	S1-36	6.49178e-06	µM	18364	127.29	WuhanPSV
2	2	S1-RBD-22	8.46754e-05	µM	S1-36	2.16393e-06	µM	16240	112.463	WuhanPSV
2	2	S1-RBD-22	8.46754e-05	µM	S1-36	0	µM	9891	68.1438	WuhanPSV
2	2	S1-RBD-22	2.82251e-05	µM	S1-36	0.383333	µM	206	0.5375	WuhanPSV
2	2	S1-RBD-22	2.82251e-05	µM	S1-36	0.127778	µM	2557	16.9487	WuhanPSV
2	2	S1-RBD-22	2.82251e-05	µM	S1-36	0.0425926	µM	2563	16.9906	WuhanPSV
2	2	S1-RBD-22	2.82251e-05	µM	S1-36	0.0141975	µM	8198	56.3258	WuhanPSV
2	2	S1-RBD-22	2.82251e-05	µM	S1-36	0.00473251	µM	11605	80.1084	WuhanPSV
2	2	S1-RBD-22	2.82251e-05	µM	S1-36	0.0015775	µM	11383	78.5588	WuhanPSV
2	2	S1-RBD-22	2.82251e-05	µM	S1-36	0.000525834	µM	12115	83.6685	WuhanPSV
2	2	S1-RBD-22	2.82251e-05	µM	S1-36	0.000175278	µM	12373	85.4695	WuhanPSV
2	2	S1-RBD-22	2.82251e-05	µM	S1-36	5.84261e-05	µM	11035	76.1295	WuhanPSV
2	2	S1-RBD-22	2.82251e-05	µM	S1-36	1.94754e-05	µM	16039	111.06	WuhanPSV
2	2	S1-RBD-22	2.82251e-05	µM	S1-36	6.49178e-06	µM	11478	79.2219	WuhanPSV
2	2	S1-RBD-22	2.82251e-05	µM	S1-36	2.16393e-06	µM	15411	106.676	WuhanPSV
2	2	S1-RBD-22	2.82251e-05	µM	S1-36	0	µM	10900	75.1872	WuhanPSV
2	2	S1-RBD-22	9.40838e-06	µM	S1-36	0.383333	µM	198	0.481656	WuhanPSV
2	2	S1-RBD-22	9.40838e-06	µM	S1-36	0.127778	µM	370	1.6823	WuhanPSV
2	2	S1-RBD-22	9.40838e-06	µM	S1-36	0.0425926	µM	3505	23.5662	WuhanPSV
2	2	S1-RBD-22	9.40838e-06	µM	S1-36	0.0141975	µM	6965	47.7188	WuhanPSV
2	2	S1-RBD-22	9.40838e-06	µM	S1-36	0.00473251	µM	8099	55.6347	WuhanPSV
2	2	S1-RBD-22	9.40838e-06	µM	S1-36	0.0015775	µM	17967	124.518	WuhanPSV
2	2	S1-RBD-22	9.40838e-06	µM	S1-36	0.000525834	µM	11804	81.4976	WuhanPSV
2	2	S1-RBD-22	9.40838e-06	µM	S1-36	0.000175278	µM	10237	70.5591	WuhanPSV
2	2	S1-RBD-22	9.40838e-06	µM	S1-36	5.84261e-05	µM	10803	74.5101	WuhanPSV
2	2	S1-RBD-22	9.40838e-06	µM	S1-36	1.94754e-05	µM	12249	84.6039	WuhanPSV
2	2	S1-RBD-22	9.40838e-06	µM	S1-36	6.49178e-06	µM	8239	56.612	WuhanPSV
2	2	S1-RBD-22	9.40838e-06	µM	S1-36	2.16393e-06	µM	14255	98.6068	WuhanPSV
2	2	S1-RBD-22	9.40838e-06	µM	S1-36	0	µM	10092	69.5469	WuhanPSV
2	2	S1-RBD-22	0	µM	S1-36	0.383333	µM	523	2.75032	WuhanPSV
2	2	S1-RBD-22	0	µM	S1-36	0.127778	µM	881	5.24935	WuhanPSV
2	2	S1-RBD-22	0	µM	S1-36	0.0425926	µM	4387	29.723	WuhanPSV
2	2	S1-RBD-22	0	µM	S1-36	0.0141975	µM	4567	30.9795	WuhanPSV
2	2	S1-RBD-22	0	µM	S1-36	0.00473251	µM	12490	86.2862	WuhanPSV
2	2	S1-RBD-22	0	µM	S1-36	0.0015775	µM	21715	150.681	WuhanPSV
2	2	S1-RBD-22	0	µM	S1-36	0.000525834	µM	12826	88.6316	WuhanPSV
2	2	S1-RBD-22	0	µM	S1-36	0.000175278	µM	9278	63.8648	WuhanPSV
2	2	S1-RBD-22	0	µM	S1-36	5.84261e-05	µM	14418	99.7446	WuhanPSV
2	2	S1-RBD-22	0	µM	S1-36	1.94754e-05	µM	13966	96.5894	WuhanPSV
2	2	S1-RBD-22	0	µM	S1-36	6.49178e-06	µM	10887	75.0964	WuhanPSV
2	2	S1-RBD-22	0	µM	S1-36	2.16393e-06	µM	10577	72.9325	WuhanPSV
2	1	S1-RBD-22	0	µM	S1-36	0	µM	14431	99.8354	WuhanPSV
2	2	S1-RBD-22	0	µM	S1-36	0	µM	18403	127.562	WuhanPSV
2	3	S1-RBD-22	0	µM	S1-36	0	µM	16256	112.575	WuhanPSV
2	4	S1-RBD-22	0	µM	S1-36	0	µM	12685	87.6474	WuhanPSV
2	5	S1-RBD-22	0	µM	S1-36	0	µM	10544	72.7021	WuhanPSV
2	6	S1-RBD-22	0	µM	S1-36	0	µM	17934	124.288	WuhanPSV
2	7	S1-RBD-22	0	µM	S1-36	0	µM	17842	123.646	WuhanPSV
2	8	S1-RBD-22	0	µM	S1-36	0	µM	13604	94.0625	WuhanPSV
2	9	S1-RBD-22	0	µM	S1-36	0	µM	10195	70.2659	WuhanPSV
2	10	S1-RBD-22	0	µM	S1-36	0	µM	12006	82.9076	WuhanPSV
2	11	S1-RBD-22	0	µM	S1-36	0	µM	12174	84.0803	WuhanPSV
2	12	S1-RBD-22	0	µM	S1-36	0	µM	17381	120.428	WuhanPSV
2	1	S1-RBD-22	100	µM	S1-36	100	µM	102	-0.188474	WuhanPSV
2	2	S1-RBD-22	100	µM	S1-36	100	µM	70	-0.411851	WuhanPSV
2	3	S1-RBD-22	100	µM	S1-36	100	µM	119	-0.0698052	WuhanPSV
2	4	S1-RBD-22	100	µM	S1-36	100	µM	177	0.335065	WuhanPSV
2	5	S1-RBD-22	100	µM	S1-36	100	µM	160	0.216396	WuhanPSV
2	6	S1-RBD-22	100	µM	S1-36	100	µM	165	0.251299	WuhanPSV
2	7	S1-RBD-22	100	µM	S1-36	100	µM	89	-0.279221	WuhanPSV
2	8	S1-RBD-22	100	µM	S1-36	100	µM	91	-0.26526	WuhanPSV
2	9	S1-RBD-22	100	µM	S1-36	100	µM	154	0.174513	WuhanPSV
2	10	S1-RBD-22	100	µM	S1-36	100	µM	112	-0.118669	WuhanPSV
2	11	S1-RBD-22	100	µM	S1-36	100	µM	156	0.188474	WuhanPSV
2	12	S1-RBD-22	100	µM	S1-36	100	µM	153	0.167532	WuhanPSV
2	3	S1-RBD-22	1.66667	µM	S1-36	0.383333	µM	205	0.530519	WuhanPSV
2	3	S1-RBD-22	0.555556	µM	S1-36	0.127778	µM	199	0.488636	WuhanPSV
2	3	S1-RBD-22	0.185185	µM	S1-36	0.0425926	µM	226	0.67711	WuhanPSV
2	3	S1-RBD-22	0.0617284	µM	S1-36	0.0141975	µM	5150	35.0492	WuhanPSV
2	3	S1-RBD-22	0.0205761	µM	S1-36	0.00473251	µM	8880	61.0865	WuhanPSV
2	3	S1-RBD-22	0.00685871	µM	S1-36	0.0015775	µM	11481	79.2428	WuhanPSV
2	3	S1-RBD-22	0.00228624	µM	S1-36	0.000525834	µM	12954	89.5252	WuhanPSV
2	3	S1-RBD-22	0.000762079	µM	S1-36	0.000175278	µM	12878	88.9946	WuhanPSV
2	3	S1-RBD-22	0.000254026	µM	S1-36	5.84261e-05	µM	9698	66.7966	WuhanPSV
2	3	S1-RBD-22	8.46754e-05	µM	S1-36	1.94754e-05	µM	10478	72.2414	WuhanPSV
2	3	S1-RBD-22	2.82251e-05	µM	S1-36	6.49178e-06	µM	10974	75.7037	WuhanPSV
2	3	S1-RBD-22	9.40838e-06	µM	S1-36	2.16393e-06	µM	13624	94.2021	WuhanPSV
2	4	S1-RBD-22	1.66667	µM	S1-36	0.383333	µM	249	0.837662	WuhanPSV
2	4	S1-RBD-22	0.555556	µM	S1-36	0.127778	µM	241	0.781818	WuhanPSV
2	4	S1-RBD-22	0.185185	µM	S1-36	0.0425926	µM	272	0.998214	WuhanPSV
2	4	S1-RBD-22	0.0617284	µM	S1-36	0.0141975	µM	3257	21.8351	WuhanPSV
2	4	S1-RBD-22	0.0205761	µM	S1-36	0.00473251	µM	5689	38.8117	WuhanPSV
2	4	S1-RBD-22	0.00685871	µM	S1-36	0.0015775	µM	10211	70.3776	WuhanPSV
2	4	S1-RBD-22	0.00228624	µM	S1-36	0.000525834	µM	18061	125.175	WuhanPSV
2	4	S1-RBD-22	0.000762079	µM	S1-36	0.000175278	µM	8148	55.9768	WuhanPSV
2	4	S1-RBD-22	0.000254026	µM	S1-36	5.84261e-05	µM	14730	101.923	WuhanPSV
2	4	S1-RBD-22	8.46754e-05	µM	S1-36	1.94754e-05	µM	8892	61.1703	WuhanPSV
2	4	S1-RBD-22	2.82251e-05	µM	S1-36	6.49178e-06	µM	9798	67.4946	WuhanPSV
2	4	S1-RBD-22	9.40838e-06	µM	S1-36	2.16393e-06	µM	17642	122.25	WuhanPSV
1	1	S1-RBD-22	1.66667	µM	S1-36	0.383333	µM	315	0.29438	deltaPSV
1	1	S1-RBD-22	1.66667	µM	S1-36	0.127778	µM	353	0.468489	deltaPSV
1	1	S1-RBD-22	1.66667	µM	S1-36	0.0425926	µM	315	0.29438	deltaPSV
1	1	S1-RBD-22	1.66667	µM	S1-36	0.0141975	µM	345	0.431834	deltaPSV
1	1	S1-RBD-22	1.66667	µM	S1-36	0.00473251	µM	492	1.10536	deltaPSV
1	1	S1-RBD-22	1.66667	µM	S1-36	0.0015775	µM	325	0.340198	deltaPSV
1	1	S1-RBD-22	1.66667	µM	S1-36	0.000525834	µM	347	0.440998	deltaPSV
1	1	S1-RBD-22	1.66667	µM	S1-36	0.000175278	µM	339	0.404344	deltaPSV
1	1	S1-RBD-22	1.66667	µM	S1-36	5.84261e-05	µM	316	0.298962	deltaPSV
1	1	S1-RBD-22	1.66667	µM	S1-36	1.94754e-05	µM	302	0.234817	deltaPSV
1	1	S1-RBD-22	1.66667	µM	S1-36	6.49178e-06	µM	433	0.835032	deltaPSV
1	1	S1-RBD-22	1.66667	µM	S1-36	2.16393e-06	µM	329	0.358526	deltaPSV
1	1	S1-RBD-22	1.66667	µM	S1-36	0	µM	159	-0.42038	deltaPSV
1	1	S1-RBD-22	0.555556	µM	S1-36	0.383333	µM	388	0.628852	deltaPSV
1	1	S1-RBD-22	0.555556	µM	S1-36	0.127778	µM	307	0.257726	deltaPSV
1	1	S1-RBD-22	0.555556	µM	S1-36	0.0425926	µM	320	0.317289	deltaPSV
1	1	S1-RBD-22	0.555556	µM	S1-36	0.0141975	µM	303	0.239399	deltaPSV
1	1	S1-RBD-22	0.555556	µM	S1-36	0.00473251	µM	311	0.276053	deltaPSV
1	1	S1-RBD-22	0.555556	µM	S1-36	0.0015775	µM	341	0.413507	deltaPSV
1	1	S1-RBD-22	0.555556	µM	S1-36	0.000525834	µM	396	0.665506	deltaPSV
1	1	S1-RBD-22	0.555556	µM	S1-36	0.000175278	µM	295	0.202744	deltaPSV
1	1	S1-RBD-22	0.555556	µM	S1-36	5.84261e-05	µM	294	0.198163	deltaPSV
1	1	S1-RBD-22	0.555556	µM	S1-36	1.94754e-05	µM	300	0.225653	deltaPSV
1	1	S1-RBD-22	0.555556	µM	S1-36	6.49178e-06	µM	309	0.26689	deltaPSV
1	1	S1-RBD-22	0.555556	µM	S1-36	2.16393e-06	µM	266	0.0698724	deltaPSV
1	1	S1-RBD-22	0.555556	µM	S1-36	0	µM	344	0.427253	deltaPSV
1	1	S1-RBD-22	0.185185	µM	S1-36	0.383333	µM	350	0.454743	deltaPSV
1	1	S1-RBD-22	0.185185	µM	S1-36	0.127778	µM	300	0.225653	deltaPSV
1	1	S1-RBD-22	0.185185	µM	S1-36	0.0425926	µM	274	0.106527	deltaPSV
1	1	S1-RBD-22	0.185185	µM	S1-36	0.0141975	µM	379	0.587615	deltaPSV
1	1	S1-RBD-22	0.185185	µM	S1-36	0.00473251	µM	310	0.271471	deltaPSV
1	1	S1-RBD-22	0.185185	µM	S1-36	0.0015775	µM	301	0.230235	deltaPSV
1	1	S1-RBD-22	0.185185	µM	S1-36	0.000525834	µM	301	0.230235	deltaPSV
1	1	S1-RBD-22	0.185185	µM	S1-36	0.000175278	µM	233	-0.0813269	deltaPSV
1	1	S1-RBD-22	0.185185	µM	S1-36	5.84261e-05	µM	236	-0.0675815	deltaPSV
1	1	S1-RBD-22	0.185185	µM	S1-36	1.94754e-05	µM	269	0.0836178	deltaPSV
1	1	S1-RBD-22	0.185185	µM	S1-36	6.49178e-06	µM	285	0.156927	deltaPSV
1	1	S1-RBD-22	0.185185	µM	S1-36	2.16393e-06	µM	295	0.202744	deltaPSV
1	1	S1-RBD-22	0.185185	µM	S1-36	0	µM	1734	6.79595	deltaPSV
1	1	S1-RBD-22	0.0617284	µM	S1-36	0.383333	µM	317	0.303544	deltaPSV
1	1	S1-RBD-22	0.0617284	µM	S1-36	0.127778	µM	277	0.120272	deltaPSV
1	1	S1-RBD-22	0.0617284	µM	S1-36	0.0425926	µM	293	0.193581	deltaPSV
1	1	S1-RBD-22	0.0617284	µM	S1-36	0.0141975	µM	1229	4.48214	deltaPSV
1	1	S1-RBD-22	0.0617284	µM	S1-36	0.00473251	µM	293	0.193581	deltaPSV
1	1	S1-RBD-22	0.0617284	µM	S1-36	0.0015775	µM	311	0.276053	deltaPSV
1	1	S1-RBD-22	0.0617284	µM	S1-36	0.000525834	µM	296	0.207326	deltaPSV
1	1	S1-RBD-22	0.0617284	µM	S1-36	0.000175278	µM	255	0.0194726	deltaPSV
1	1	S1-RBD-22	0.0617284	µM	S1-36	5.84261e-05	µM	373	0.560125	deltaPSV
1	1	S1-RBD-22	0.0617284	µM	S1-36	1.94754e-05	µM	243	-0.0355089	deltaPSV
1	1	S1-RBD-22	0.0617284	µM	S1-36	6.49178e-06	µM	246	-0.0217635	deltaPSV
1	1	S1-RBD-22	0.0617284	µM	S1-36	2.16393e-06	µM	346	0.436416	deltaPSV
1	1	S1-RBD-22	0.0617284	µM	S1-36	0	µM	7346	32.509	deltaPSV
1	1	S1-RBD-22	0.0205761	µM	S1-36	0.383333	µM	1206	4.37676	deltaPSV
1	1	S1-RBD-22	0.0205761	µM	S1-36	0.127778	µM	790	2.47073	deltaPSV
1	1	S1-RBD-22	0.0205761	µM	S1-36	0.0425926	µM	1983	7.93682	deltaPSV
1	1	S1-RBD-22	0.0205761	µM	S1-36	0.0141975	µM	3357	14.2322	deltaPSV
1	1	S1-RBD-22	0.0205761	µM	S1-36	0.00473251	µM	4603	19.9411	deltaPSV
1	1	S1-RBD-22	0.0205761	µM	S1-36	0.0015775	µM	836	2.6815	deltaPSV
1	1	S1-RBD-22	0.0205761	µM	S1-36	0.000525834	µM	2527	10.4293	deltaPSV
1	1	S1-RBD-22	0.0205761	µM	S1-36	0.000175278	µM	4089	17.5861	deltaPSV
1	1	S1-RBD-22	0.0205761	µM	S1-36	5.84261e-05	µM	3529	15.0203	deltaPSV
1	1	S1-RBD-22	0.0205761	µM	S1-36	1.94754e-05	µM	1674	6.52104	deltaPSV
1	1	S1-RBD-22	0.0205761	µM	S1-36	6.49178e-06	µM	1505	5.74672	deltaPSV
1	1	S1-RBD-22	0.0205761	µM	S1-36	2.16393e-06	µM	3201	13.5174	deltaPSV
1	1	S1-RBD-22	0.0205761	µM	S1-36	0	µM	12235	54.9094	deltaPSV
1	1	S1-RBD-22	0.00685871	µM	S1-36	0.383333	µM	1759	6.91049	deltaPSV
1	1	S1-RBD-22	0.00685871	µM	S1-36	0.127778	µM	7578	33.572	deltaPSV
1	1	S1-RBD-22	0.00685871	µM	S1-36	0.0425926	µM	9770	43.6153	deltaPSV
1	1	S1-RBD-22	0.00685871	µM	S1-36	0.0141975	µM	6630	29.2284	deltaPSV
1	1	S1-RBD-22	0.00685871	µM	S1-36	0.00473251	µM	9928	44.3392	deltaPSV
1	1	S1-RBD-22	0.00685871	µM	S1-36	0.0015775	µM	13407	60.2793	deltaPSV
1	1	S1-RBD-22	0.00685871	µM	S1-36	0.000525834	µM	6835	30.1677	deltaPSV
1	1	S1-RBD-22	0.00685871	µM	S1-36	0.000175278	µM	10295	46.0207	deltaPSV
1	1	S1-RBD-22	0.00685871	µM	S1-36	5.84261e-05	µM	7015	30.9924	deltaPSV
1	1	S1-RBD-22	0.00685871	µM	S1-36	1.94754e-05	µM	11842	53.1087	deltaPSV
1	1	S1-RBD-22	0.00685871	µM	S1-36	6.49178e-06	µM	11630	52.1374	deltaPSV
1	1	S1-RBD-22	0.00685871	µM	S1-36	2.16393e-06	µM	13778	61.9791	deltaPSV
1	1	S1-RBD-22	0.00685871	µM	S1-36	0	µM	16956	76.5401	deltaPSV
1	1	S1-RBD-22	0.00228624	µM	S1-36	0.383333	µM	5401	23.5974	deltaPSV
[truncated: 3,001 more rows]
